# Supplementary material for: Pharmaceutical payments to certified oncology specialists in Japan in 2016: a retrospective observational cross-sectional analysis
Source: PubMed Central journal article supplement — BMJ Open. 2019 Sep 6;9(9):e028805. doi: 10.1136/bmjopen-2018-028805 (PMC6731803; doi:10.1136/bmjopen-2018-028805), 2019-09-06
Supplement: bmjopen-2018-028805.draft_revisions.pdf [file bmjopen-2018-028805.draft_revisions.pdf]

# BMJ Open

BMJ Open is committed to open peer review. As part of this commitment we make the peer review history of every article we publish publicly available.

When an article is published we post the peer reviewers' comments and the authors' responses online. We also post the versions of the paper that were used during peer review. These are the versions that the peer review comments apply to.

The versions of the paper that follow are the versions that were submitted during the peer review process. They are not the versions of record or the final published versions. They should not be cited or distributed as the published version of this manuscript.

BMJ Open is an open access journal and the full, final, typeset and author-corrected version of record of the manuscript is available on our site with no access controls, subscription charges or pay-per-view fees (<http://bmjopen.bmj.com>).

If you have any questions on BMJ Open's open peer review process please email [info.bmjopen@bmj.com](mailto:info.bmjopen@bmj.com)

# BMJ Open

## Pharmaceutical payments to certified oncology specialists in Japan in 2016: a retrospective observational study

|                               |                                                                                                                                                                                                                                                                                                                                                                                                                                                                                                                                                                                          |
|-------------------------------|------------------------------------------------------------------------------------------------------------------------------------------------------------------------------------------------------------------------------------------------------------------------------------------------------------------------------------------------------------------------------------------------------------------------------------------------------------------------------------------------------------------------------------------------------------------------------------------|
| Journal:                      | <i>BMJ Open</i>                                                                                                                                                                                                                                                                                                                                                                                                                                                                                                                                                                          |
| Manuscript ID                 | bmjopen-2018-028805                                                                                                                                                                                                                                                                                                                                                                                                                                                                                                                                                                      |
| Article Type:                 | Research                                                                                                                                                                                                                                                                                                                                                                                                                                                                                                                                                                                 |
| Date Submitted by the Author: | 24-Dec-2018                                                                                                                                                                                                                                                                                                                                                                                                                                                                                                                                                                              |
| Complete List of Authors:     | Ozaki, Akihiko; Medical Governance Research Institute<br>Saito, Hiroaki; Sendai Kousei Hospital,<br>Onoue, Yosuke; College of Humanities and Sciences, Nihon University<br>Sawano, Toyooki; Minamisoma Municipal General Hospital, Department of Surgery<br>Shimada, Yuki; Minamisoma Municipal General Hospital, Neurosurgery<br>Somekawa, Yurie; Medical Governance Research Institute<br>Tsuji, Aritsune; Medical Governance Research Institute<br>Crump, Andy; Kitasato Institute for Life Sciences, Kitasato University<br>Tanimoto, Tetsuya; Medical Governance Research Institute |
| Keywords:                     | conflicts of interest, oncology specialist, Japan, industry payment, Japanese Society of Medical Oncology                                                                                                                                                                                                                                                                                                                                                                                                                                                                                |
|                               |                                                                                                                                                                                                                                                                                                                                                                                                                                                                                                                                                                                          |

SCHOLARONE™  
Manuscripts

1  
2  
3  
4  
5  
6  
7 **BMJ Open, Research article**  
8

9  
10  
11  
12 **Title:**  
13

14  
15 **Pharmaceutical payments to certified oncology specialists in Japan in**  
16  
17  
18 **2016: a retrospective observational study**  
19  
20  
21  
22

23  
24 **Corresponding author:**  
25

26  
27 Akihiko Ozaki, MD, Medical Governance Research Institute, Minato-ku, Tokyo,  
28

29  
30 1080074 Japan.  
31

32  
33 Telephone: 81-3-6455-7401  
34

35  
36 FAX: 81-3-3441-7505  
37

38  
39 Email address: ozakiakihiko@gmail.com.  
40  
41

42  
43  
44  
45 **Authors:**  
46

47  
48 Akihiko Ozaki, MD<sup>1</sup>, Hiroaki Saito, MD<sup>2</sup>, Yosuke Onoue, PhD<sup>3</sup>, Toyoaki Sawano,  
49

50  
51 MD<sup>4</sup>, Yuki Shimada<sup>5</sup>, MD, Yurie Somekawa<sup>1</sup>, MD, Aritsune Tsuji<sup>1</sup>, Prof Andy  
52

53  
54 Crump<sup>6</sup>, Tetsuya Tanimoto, MD<sup>1</sup>  
55  
56  
57

1  
2  
3  
4  
5  
6 **19 Affiliations:**  
7  
8

9 **20** <sup>1</sup> Medical Governance Research Institute, Minato-ku, Tokyo, Japan  
10  
11

12 **21** <sup>2</sup> Department of Gastroenterology, Sendai Kousei Hospital, Sendai, Sendai,  
13  
14  
15 **22** Miyagi, Japan  
16  
17

18 **23** <sup>3</sup> Department of Information Science, College of Humanities and Sciences,  
19  
20  
21 **24** Nihon University, Setagaya-ku, Tokyo, Japan  
22  
23

24 **25** <sup>4</sup> Department of Information Science, College of Humanities and Sciences,  
25  
26  
27 **26** Nihon University, Setagaya-ku, Tokyo, Japan  
28  
29

30 **27** <sup>4</sup> Department of Surgery, Minamisoma Municipal General Hospital, Minamisoma,  
31  
32  
33 **28** Fukushima, Japan  
34  
35

36 **29** <sup>5</sup> Department of Neurosurgery, Minamisoma Municipal General Hospital,  
37  
38  
39 **30** Minamisoma, Fukushima, Japan  
40  
41

42 **31** <sup>6</sup> Kitasato Institute for Life Sciences, Kitasato University, Minato-Ku, Tokyo,  
43  
44  
45 **32** Japan.  
46  
47

48 **33**  
49  
50

51 **34 Abstract**  
52  
53

54 **35** Objective: This study aimed to elucidate the characteristics of payments from  
55  
56  
57 **36** pharmaceutical companies to oncology specialists in Japan, whether the  
58  
59  
60

1  
2  
3  
4  
5  
6 37 payment was made for promotion, and whether there are specific rules to cover

7  
8  
9 38 Conflict of Interest (COI) matters among the oncology specialists.

10  
11  
12 39

13  
14  
15 40 Design, Setting, and Participants: The participants were oncology specialists

16  
17  
18 41 certified by the Japanese Society of Medical Oncology (JSMO) up to 2016. We

19  
20  
21 42 retrospectively extracted 2016 payment data reported by 71 Japanese

22  
23  
24 43 pharmaceutical companies.

25  
26  
27 44

28  
29  
30 45 Outcome measures: We made descriptive analyses for payments to the

31  
32  
33 46 individual specialists, made generalized linear models to estimate factors

34  
35  
36 47 associated with higher value payments, made a Sankey diagram to illustrate the

37  
38  
39 48 payment flow from the companies to oncology subspecialties, analyzed

40  
41  
42 49 oncology drugs with the annual sales of ¥5 billion [\$44,424,500] or above, and

43  
44  
45 50 examined the JSMO policy for disclosing COIs.

46  
47  
48 51

49  
50  
51 52 Results: The total and mean monetary value of payments from pharmaceutical

52  
53  
54 53 companies was ¥598,286,743 [\$5,315,718], and ¥553,457 [\$4,917] (standard

55  
56  
57 54 deviation ¥1,264,398 [\$11,234]), respectively. Of the 1081 specialists sampled,

58  
59  
60

1  
2  
3  
4  
5  
6 55 779 (72.1%) received a payment. Of this total, 147 (13.6%) receiving a payment  
7  
8  
9 56 of at least ¥100,000 [\$8,918] received 72.5% of the total payment (¥433,622,808  
10  
11  
12 57 [\$3,852,695]). In the generalized linear models, working for a university hospital  
13  
14  
15 58 (IRR=2.43, 95% CI=1.78–3.31) was a key factor associated with larger monetary  
16  
17  
18 59 payments. the payment was likely to made toward the specialties with  
19  
20  
21 60 high-income drugs, though its tendency differed between companies.

22  
23  
24 61 Oncologists were not required to disclose any COIs related to their work.  
25  
26  
27 62

28  
29  
30 63 Conclusion: Substantial financial relationships were observed between  
31  
32  
33 64 pharmaceutical companies and oncology specialists, but their extents varied  
34  
35  
36 65 significantly between individuals. The oncology specialists were not required to  
37  
38  
39 66 disclose any COIs related to their work.  
40  
41  
42 67

43  
44  
45 68 **Keywords:** conflicts of interest; oncology specialist; Japan; industry payment;  
46  
47

48 69 Japanese Society of Medical Oncology  
49  
50  
51 70

52  
53  
54 71 **Article summary (Strengths and limitations of this study):**  
55  
56  
57  
58  
59  
60

- 1  
2  
3  
4  
5  
6 72 ✓ To the best of our knowledge, this study is the first to investigate individual  
7  
8  
9 73 payment value of the certified oncology specialists both in Japan and  
10  
11  
12 74 worldwide.  
13  
14  
15 75 ✓ The authors independently organized the payment data published by the  
16  
17  
18 76 major pharmaceutical companies, and created a single uniform database for  
19  
20  
21 77 the payment.  
22  
23  
24 78 ✓ This study only covered the payment data in 2016, which hampered a  
25  
26  
27 79 longitudinal analysis of the type and value of the payment among the  
28  
29  
30 80 oncology specialists.  
31  
32

33  
34  
35  
36  
37  
38  
39  
40  
41  
42  
43  
44  
45  
46  
47  
48  
49  
50  
51  
52  
53  
54  
55  
56  
57  
58  
59  
60

81

82 **Word count:** 3,069

83

## 84 **Introduction**

85 Pharmaceutical policy-making and medical practice is riddled with opportunities  
86 for exploitation, especially given the huge amounts of money involved.<sup>1-3</sup> From  
87 the 1950s, the main business model of the pharmaceutical industry was the  
88 production of low-price drugs to treat diseases and conditions that were primarily  
89 chronic (e.g. hypertension and diabetes).<sup>4-6</sup> With ageing populations, pollution,

1  
2  
3  
4  
5  
6 90 poor or excessive nutrition and the like cancer became an ever-increasing and  
7  
8  
9 91 major problem.<sup>7</sup> The pharmaceutical industry therefore adopted a new business  
10  
11  
12 92 model, discovery and development of anticancer agents which could be sold at  
13  
14  
15 93 extremely high price, but usually for short treatment durations.<sup>1-3</sup> This  
16  
17  
18 94 guaranteed a hefty profit in a short timeframe, provided that the drugs would be  
19  
20  
21 95 prescribed and used, while imposing an extraordinarily high cost to the  
22  
23  
24 96 patients.<sup>1-3 8</sup> Indeed, a single administration of tisagenlecleucel, a  
25  
26  
27 97 recently-approved chimeric antigen receptor T-cell immunotherapy  
28  
29  
30 98 manufactured by Novartis Pharma, reportedly costs \$475,000.<sup>9</sup>  
31  
32  
33 99  
34  
35  
36 100 Physicians remain paramount decision-makers on the demand-side of the  
37  
38  
39 101 pharmaceutical market. Even subtle financial interactions between physicians  
40  
41  
42 102 and a pharmaceutical company are known to affect their prescribing  
43  
44  
45 103 behavior,<sup>10-15</sup> and could encourage irrational or preferential use of a company's  
46  
47  
48 104 drug. Unsurprisingly, oncologists have recently become primary targets for  
49  
50  
51 105 approaches from companies with high-cost anticancer products to sell. Indeed,  
52  
53  
54 106 significant financial relationships between such companies and the authors of  
55  
56  
57 107 the Clinical Practice Guideline (CPG) issued by the National Comprehensive  
58  
59  
60



1  
2  
3  
4  
5  
6 108 Cancer Networks (NCCN) have been reported.<sup>16</sup> Given these murky  
7  
8  
9 109 circumstances, there has been a growing need for intervention, in the form of  
10  
11  
12 110 policy implementation and education about the implications of these interactions  
13  
14  
15 111 to help protect doctors, patients, institutions and the companies themselves.<sup>12-15</sup>  
16  
17  
18 112 Consequently, medical and governmental facilities worldwide are considering  
19  
20  
21 113 guidelines, self-regulation and legislative checks to help control the relationship  
22  
23  
24 114 between physicians and the pharmaceutical industry, exemplified by the USA's  
25  
26  
27 115 Physician Payments Sunshine Act, enacted in 2010.<sup>17 18</sup>  
28  
29  
30 116  
31  
32  
33 117 Although Japan has the third largest pharmaceutical market, with annual  
34  
35  
36 118 pharmaceutical sales of \$76 billion in 2017,<sup>19</sup> its overall scale has been declining  
37  
38  
39 119 at approximately 2% annually.<sup>20</sup> To maintain sales in these competitive and  
40  
41  
42 120 tightening markets, forceful advertisement of high-price products, namely novel  
43  
44  
45 121 oncology drugs, has become increasingly important for pharmaceutical  
46  
47  
48 122 companies. Indeed, sales of oncology drugs have recently been rising in Japan,  
49  
50  
51 123 exceeding ¥1 trillion [\$8.9 billion] for the first time in 2016.<sup>21</sup> Furthermore, sales  
52  
53  
54 124 are predicted to increase 1.5-fold in the next decade with the increasing  
55  
56  
57 125 application of immunotherapy in clinical practice.<sup>21</sup> It would be reasonable to  
58  
59  
60

1  
2  
3  
4  
5  
6 126 assume that pharmaceutical companies will increasingly deploy marketing  
7  
8  
9 127 measures and incentives targeting oncology specialists for the immediate and  
10  
11  
12 128 foreseeable future.  
13  
14  
15 129  
16  
17  
18 130 In Japan, the Japan Pharmaceutical Manufacturers Association (JPMA) has  
19  
20  
21 131 made details of pharmaceutical company payments publicly available since  
22  
23  
24 132 fiscal year 2013.<sup>22</sup> The aim was to improve the transparency of linkages  
25  
26  
27 133 between pharmaceutical companies and physicians, as in the USA's Physician  
28  
29  
30 134 Payments Sunshine Act,<sup>17 18</sup> the transparency surrounding payment disclosures  
31  
32  
33 135 in Japan being traditionally very poor, with examination of company/physicians  
34  
35  
36 136 links and payments in a meaningful way proving almost impossible. Furthermore,  
37  
38  
39 137 little was known about regulations concerning oncologists having to declare  
40  
41  
42 138 details with respect to Conflicts of Interest (COIs) that could affect their work.  
43  
44  
45 139  
46  
47  
48 140 The aims of the current study were: 1) to understand and evaluate the  
49  
50  
51 141 characteristics and distributions of financial payments made by pharmaceutical  
52  
53  
54 142 companies to oncology specialists: 2) to examine a well-accepted belief that  
55  
56  
57 143 pharmaceutical companies make payments to promote their products; and 3) to  
58  
59  
60

1  
2  
3  
4  
5  
6 144 elucidate whether Japanese oncology specialists are obliged in any way to

7  
8  
9 145 disclose their COIs.

10  
11  
12 146

13  
14  
15 147 **Methods**

16  
17  
18 148 *Study setting and participants*

19  
20  
21 149 We included all oncology specialists certified by the Japanese Society of  
22  
23  
24 150 Medical Oncology (JSMO) as of the beginning of April 1, 2016. The JSMO, with  
25  
26  
27 151 9,154 members in 2017, is the largest professional medical society in the  
28  
29  
30 152 oncology field in Japan. The JSMO began operating a specialty recording  
31  
32  
33 153 system for members in 2004. In general, Japanese certified oncologists have  
34  
35  
36 154 strong discretionary power with respect to their prescribing of oncology drugs, as,  
37  
38  
39 155 in the past, only these physicians were allowed to prescribe specific agents,  
40  
41  
42 156 such as nivolumab and gefitinib.

43  
44  
45 157

46  
47  
48 158 *Sources of Payment Data*

49  
50  
51 159 We collected payment data, as published by all 71 companies that belonged to  
52  
53  
54 160 the JPMA. For most eligible companies, the 2016 data was the most recent, with  
55  
56  
57 161 previous payment data being unavailable. The companies included in this study,

1  
2  
3  
4  
5  
6 162 plus the starting and ending dates of their payment data, are listed in  
7  
8  
9 163 Supplementary Material 1.  
10  
11  
12 164  
13  
14  
15 165 We obtained each company's data and organized them into a unified single  
16  
17  
18 166 database as follows; first, because no data was published as a spreadsheet,  
19  
20  
21 167 data with character codes was converted into a spreadsheet format. Second,  
22  
23  
24 168 data with no character code was converted into text files using an Optical  
25  
26  
27 169 Character Reader. Third, when data was protected against facsimile or  
28  
29  
30 170 reproduction, we used FullShot10 software (Inbit, CA, USA) to scan photos of  
31  
32  
33 171 the data and converted the data into text files. Finally, we confirmed the  
34  
35  
36 172 accuracy of the organized data by comparing it with the original data. The  
37  
38  
39 173 database included physicians' names, their main institutions, payments received,  
40  
41  
42 174 the form of the payments, and the total amount of payments. The form of  
43  
44  
45 175 payment was categorized into three types; payment for speaking, payment for  
46  
47  
48 176 writing, and consulting fees.

50  
51 177

52  
53  
54 178 *Data collection*  
55  
56  
57  
58  
59  
60

1  
2  
3  
4  
5  
6 179 We examined payment data for all oncology specialists included in this study.  
7  
8  
9 180 Further, we determined their main working institution and region, along with the  
10  
11  
12 181 year of their certification from the JSMO website. We further extracted the  
13  
14  
15 182 subspecialties (respiratory, gastroenterology, hematology, breast, etc.) of all  
16  
17  
18 183 individuals who received a payment of ¥1 million [\$8,885] or above from any  
19  
20  
21 184 pharmaceutical company, collating data from institutional websites using an  
22  
23  
24 185 internet search engine (Google). In general, ¥1 million [\$8,885] is approximately  
25  
26  
27 186 25% of the median annual income of a Japanese citizen.<sup>23</sup> In addition, we  
28  
29  
30 187 attempted find any COI policy from the JSMO website.  
31  
32

33 188

34  
35  
36 189 *Data analysis*  
37

38  
39 190 To examine the characteristics and distributions of payments, we performed  
40  
41  
42 191 descriptive analyses of the data on an individual oncology specialist and  
43  
44  
45 192 pharmaceutical company basis. We then specifically summarized the  
46  
47  
48 193 characteristics of oncology specialists receiving a total payment of ¥1 million  
49  
50  
51 194 [\$8,885] or above. Using a multivariate negative binomial regression model, we  
52  
53  
54 195 subsequently examined possible factors associated with the monetary value of  
55  
56  
57 196 the payment to the individual oncologists, using working institutions, working  
58  
59  
60

1  
2  
3  
4  
5  
6 197 regions, and year of experience after the board certification as covariates. The  
7  
8  
9 198 payment data was rounded off as a unit of ¥1 million [\$8,885]. Further, to assess  
10  
11  
12 199 the effects of the subspecialty on the value of the payment, using a  
13  
14  
15 200 zero-truncated negative binomial model, we repeated the analysis among those  
16  
17  
18 201 receiving payments of ¥1 million [\$8,885] or above. Second, to confirm whether  
19  
20  
21 202 the payment was made for promotional purposes, we created a Sankey diagram  
22  
23  
24 203 among the specialists in this cohort to illustrate the distribution of the payment to  
25  
26  
27 204 each subspecialty on an individual company basis. The Sankey diagram is a  
28  
29  
30 205 flow diagram, where band width proportionally represents the flow quantity.<sup>24</sup>  
31  
32  
33 206 Payment values from individual companies, according to subspecialty, are  
34  
35  
36 207 depicted in the bands in the diagram, width being proportional to the total  
37  
38  
39 208 amount of the payment. In addition, to see whether the payment was linked to  
40  
41  
42 209 any specific oncology drugs, we examined such drugs with annual Japanese  
43  
44  
45 210 domestic sales of ¥5 billion [\$44,424,500] or above, and if each drug was  
46  
47  
48 211 covered in the Japanese National Health Insurance scheme in 2016. We  
49  
50  
51 212 converted Japanese yen (¥) to US dollars (\$) using the October 21, 2018  
52  
53  
54 213 exchange rate of ¥113 yen per US\$1.  
55  
56

57 214  
58  
59  
60

1  
2  
3  
4  
5  
6 215 *Ethics approval*  
7

8  
9 216 This study was approved by the Institutional Review Board of Medical  
10

11  
12 217 Governance Research Institute (MEGRI) on 16 May 2018.  
13

14  
15 218  
16

17  
18 219 *Patient and Public Involvement*  
19

20  
21 220 The present study is a retrospective analysis of the existing database, and we  
22

23  
24 221 did not include the patients and other population in particular in the development  
25

26  
27 222 of the study design.  
28

29  
30 223  
31

32  
33 224 *Role of the funding source*  
34

35  
36 225 The funders – Ain Pharmaciez Inc. and Waseda Chronicle made no contribution  
37

38  
39 226 whatsoever to either the design of the study, the work carried out or the  
40

41  
42 227 interpretation of the study findings.  
43

44  
45 228  
46

47  
48 229 **Results**  
49

50  
51 230 Table 1 summarizes the details of certified oncology specialists and payments  
52

53  
54 231 from Japanese pharmaceutical firms. Of 1081 eligible certified oncology  
55  
56  
57  
58  
59  
60

1  
2  
3  
4  
5  
6 232 specialists, 315 (29.1%), 142 (13.1%), and 407 (37.7%) worked for university  
7  
8  
9 233 hospitals, cancer hospitals, and other general hospitals, respectively.  
10  
11  
12 234  
13  
14  
15 235 The total monetary value of the payments made was ¥598,286,743 [\$5,315,718],  
16  
17  
18 236 entailing 7,445 payments. The mean and median monetary value of an  
19  
20  
21 237 individual payment was ¥553,457 [\$4,917] (standard deviation (SD) ¥1,264,398  
22  
23  
24 238 [\$11,234]) and ¥122,507 [\$1,088] (interquartile range (IQR) ¥ 0–445,480 [\$0–  
25  
26  
27 239 3,958]), respectively. Similarly, the mean and median figure for the number of  
28  
29  
30 240 individual payments was 7 (SD 13) and 2 (IQR 0–7), respectively. The number of  
31  
32  
33 241 oncology specialists receiving any payment was 779 (72.1%). Of the 1081  
34  
35  
36 242 participants, 147 (13.6%) received payments totaling ¥1 million [\$8,885] or more.  
37  
38  
39 243 while 20 (1.9%) received ¥5 million [\$44,425] or above. Only 3 (0.2%) received  
40  
41  
42 244 ¥10 million [\$88,849] or above.  
43  
44  
45 245  
46  
47  
48 246 A summary of payments of 56 companies which made any payment to the  
49  
50  
51 247 oncologists is shown in Table 2. The Chugai Pharmaceutical Co. Ltd., a  
52  
53  
54 248 subsidiary of F. Hoffmann-La Roche Ltd, made the largest total payment of  
55  
56  
57 249 ¥103,727,395 [\$921,608], while Toyama Chemical Co., Ltd. paid the lowest  
58  
59  
60



1  
2  
3  
4  
5  
6 250 (¥33,410 [\$297]). The mean and median monetary value among the companies  
7  
8  
9 251 was ¥10,877,941 [\$96,649] (SD ¥19,041,596 [\$169,183]) and ¥2,099,790  
10  
11  
12 252 [\$18,656] (IQR ¥423,206–15,207,296 [\$3,760–135,115]), respectively.  
13  
14

15 253

16  
17  
18 254 Table 3 summarizes the characteristics of specialists receiving a total payment  
19  
20  
21 255 of ¥1 million [\$8,885] and above. Overall, 50.3% worked for university hospitals,  
22  
23  
24 256 and 19.0% were certified within the last five years (2012–2016). The top three  
25  
26  
27 257 subspecialties attracting payments were respiratory (56 (38.1%)),  
28  
29  
30 258 gastroenterology (36 (24.5%)), and hematology (27 (18.4%)). The total  
31  
32  
33 259 monetary value and count was ¥433,622,808 [\$3,852,695] and 4,606,  
34  
35  
36 260 respectively accounting for 72.5% and 61.9% of the totals, with respiratory  
37  
38  
39 261 attracting (¥177,274,111 [\$1,575,062] (40.9%)), gastroenterology (¥100,424,612  
40  
41  
42 262 [\$892,262] (23.2%)) and hematology (¥81,649,310 [\$725,446] (18.8%)).  
43  
44

45 263

46  
47  
48 264 Table 4 displays findings of the multivariate regression analyses for the  
49  
50  
51 265 monetary value of payments. Oncologists with longer experience after board  
52  
53  
54 266 certification (incidence rate ratio (IRR)=1.30, 95% CI=1.23–1.37, p<0.001) and  
55  
56  
57 267 those working for university hospitals (IRR=2.43, 95% CI=1.78–3.31, p<0.001)  
58  
59  
60

1  
2  
3  
4  
5  
6 268 were significantly more likely to receive larger payments compared with their  
7  
8  
9 269 counterparts. Similar trends were observed for those with payment values of ¥1  
10  
11  
12 270 million [\$8,885] or above. Those working in the respiratory subspecialty were  
13  
14  
15 271 likely to receive higher payments compared with all others, although this trend  
16  
17  
18 272 was not statistically significant.

19  
20  
21 273

22  
23  
24 274 Figure 1 displays payment distributions to each subspecialty on an individual  
25  
26  
27 275 company basis. Details of the payments are provided in Supplementary Material  
28  
29  
30 276 2. Further, in Table 5, we summarize the list of oncology drugs with Japanese  
31  
32  
33 277 domestic sales of ¥5 billion [\$44,424,500] or more. Chugai Pharmaceutical Co.,  
34  
35  
36 278 Ltd. made the largest subspecialty payment of ¥74,542,676 [\$662,304], and the  
37  
38  
39 279 top four subspecialties were respiratory (¥25,061,169 [\$222,666], 33.6%),  
40  
41  
42 280 gastroenterology (¥24,264,112 [\$215,584], 32.6%), hematology (¥14,242,968  
43  
44  
45 281 [\$126,547], 19.1%), and breast (¥8,958,305 [79,594]. 12.0%). The Chugai  
46  
47  
48 282 company manufactured eight oncology drugs with annual sales of ¥5 billion  
49  
50  
51 283 [\$44,424,500] or more (Table 5), and three, four, one, and five drugs were  
52  
53  
54 284 respectively covered in under the National Health Insurance scheme in  
55  
56  
57 285 respiratory, gastroenterology, hematology, and breast subspecialties. Nivolumab,  
58  
59  
60

1  
2  
3  
4  
5  
6 286 manufactured by the Ono Pharmaceutical Co., Ltd., and used in respiratory and  
7  
8  
9 287 dermatology subspecialties, had the largest domestic sales in 2016 (¥103.9  
10  
11  
12 288 billion [\$923,141,110]). The total monetary value of the company's payments  
13  
14  
15 289 was ¥36,906,340 [\$327,909] (representing third place in the payment table), of  
16  
17  
18 290 which ¥24,623,912 [\$218,781] (66.7%) was specifically distributed to the  
19  
20  
21 291 respiratory subspecialty.  
22

292

27 293 The COI policy of the JSMO does not mention how oncology specialists should  
28  
29  
30 294 disclose their financial relationships with pharmaceutical industry enterprises  
31  
32  
33 295 and they do not have to report any financial relationships to the JSMO or  
34  
35  
36 296 publicly.  
37

297

## 298 **Discussion**

45 299 In this study, approximately ¥600 million [\$5,330,940] was paid by Japanese  
46  
47  
48 300 pharmaceutical companies to around 70% of the 1081 certified oncology  
49  
50  
51 301 specialists, all of whom were under no obligation to disclose the payments.  
52  
53  
54 302 Payments were concentrated on specific targets, notably oncologists working for  
55  
56  
57 303 university hospitals.  
58  
59  
60

1  
2  
3  
4  
5  
6  
7 304

8  
9 305 Compared to past studies, the proportion of certified oncologists receiving  
10  
11  
12 306 payments was larger than for general physicians in the US (48.0%)<sup>25</sup> and Japan  
13  
14  
15 307 (33.3%).<sup>26</sup> The proportion was only slightly smaller than that of NCCN oncology  
16  
17  
18 308 CPG authors in the US (86.4%).<sup>16</sup> Although the mean value of payments in our  
19  
20  
21 309 study was approximately half of that of the CPG authors (\$4,917 vs.\$10,011), a  
22  
23  
24 310 simple comparison is not valid as our analysis did not include stock ownership,  
25  
26  
27 311 investment interest, or payments from medical device companies.<sup>25</sup> The CPG  
28  
29  
30 312 authors strongly influence oncology practice both in the US and internationally,<sup>27</sup>  
31  
32  
33 313 by recommending treatment algorithms. They thus become prime targets for  
34  
35  
36 314 influence from pharmaceutical companies selling anticancer products. It is clear  
37  
38  
39 315 that Japanese pharmaceutical companies with similar anticancer interests would  
40  
41  
42 316 target oncology specialists and attempt to boost the sales and use of their  
43  
44  
45 317 specific products.

46  
47  
48 318

49  
50  
51 319 We observed a large disparity in payments to specialists. Those receiving ¥1  
52  
53  
54 320 million or more accounted for 13.6% of the total participating but received 72.5%  
55  
56  
57 321 of the total paid. Companies appear to have consciously targeted their funds to

1  
2  
3  
4  
5  
6 322 maximize promotion of their products, but not as expected. Oncologists working  
7  
8  
9 323 for university hospitals were more likely to receive a larger value payment. But in  
10  
11  
12 324 Japanese medical circles, cancer centers are generally more likely to treat more  
13  
14  
15 325 cancer patients compared to university hospitals. Indeed, cancer centers top the  
16  
17  
18 326 nationwide ratings for treatments in most of the common cancers, including lung,  
19  
20  
21 327 colon, gastric, and breast cancer.<sup>28</sup> In contrast, university hospitals are regarded  
22  
23  
24 328 as symbols of academic excellence and authority, and medical school  
25  
26  
27 329 professors traditionally have a strong influence on both physicians and medical  
28  
29  
30 330 practice in their field of expertise. Thus, our findings suggest that Japanese  
31  
32  
33 331 pharmaceutical companies have placed greater emphasis on expertise and  
34  
35  
36 332 authority, compared with clinical experience, in the selection of targets for their  
37  
38  
39 333 promotional activities.

40  
41  
42 334

43  
44  
45 335 We found that the respiratory subspecialty attracted the greatest financial outlay.  
46  
47  
48 336 In Japan, this field covers a large patient volume and involves multiple novel  
49  
50  
51 337 oncology drugs, such as nivolumab (Ono Pharmaceutical Co., Ltd, (approved  
52  
53  
54 338 2015)), pembrolizumab (MSD K.K., (2016)), alectinib (Chugai Pharmaceutical  
55  
56  
57 339 Co., Ltd., (2014)), osimertinib (AstraZeneca plc, (2016)), ramcirumab (Eli Lilly  
58  
59  
60

1  
2  
3  
4  
5  
6 340 Japan K.K., (2016)), and afanitinib (Nippon Boehringer Ingelheim Co., Ltd.,  
7  
8  
9 341 (2016)), all for non-small cell lung cancer. As such, for the pharmaceutical  
10  
11  
12 342 companies, this field is a critical yet highly competitive target in any strategy to  
13  
14  
15 343 maximize the cost-effectiveness of their promotional endeavors.  
16  
17  
18 344  
19  
20  
21 345 The examples of Chugai Pharmaceutical and Ono Pharmaceutical confirm the  
22  
23  
24 346 belief that there is an association between the value and destination of  
25  
26  
27 347 payments dependent on the products the companies in question manufacture.  
28  
29  
30 348 AstraZeneca may, from our findings, be an exception to this rule. While it made  
31  
32  
33 349 the second largest total payments to physicians with a known subspecialty  
34  
35  
36 350 (¥43,836,859 [\$389,486]), it did not have any oncology drugs providing a high  
37  
38  
39 351 income. However, it does sell an immunotherapy agent dulvalumab, which was  
40  
41  
42 352 covered by the National Health Insurance scheme for treating non-small cell  
43  
44  
45 353 lung cancer in 2018. Thus, it is reasonable to assume that funds were allocated  
46  
47  
48 354 to promote their forthcoming product and engage and incentivize key individuals  
49  
50  
51 355 for future relationships. Indeed, 86% of the company's payment was allocated to  
52  
53  
54 356 the respiratory subspecialty.  
55  
56  
57 357  
58  
59  
60

1  
2  
3  
4  
5  
6 358 Surprisingly, there is no clear rule for COI disclosure among Japanese oncology  
7  
8  
9 359 specialists. As we have demonstrated, there is an emphatic financial relationship  
10  
11  
12 360 between pharmaceutical companies and oncologists, which to many would  
13  
14  
15 361 appear unhealthy or of a somewhat dubious nature. It is true that the receipt of  
16  
17  
18 362 the abovementioned payments in Japan is not illegal, as they are supposedly  
19  
20  
21 363 given as remuneration for lectures, writing and consultations. However, we  
22  
23  
24 364 believe that there is an ethical problem inherent in such relationships, given that  
25  
26  
27 365 this practice could have developed to possibly end up expanding the profit of  
28  
29  
30 366 pharmaceutical companies, rather than promoting the health and well-being of  
31  
32  
33 367 patients. Indeed, even a subtle but reputable financial relationship with the  
34  
35  
36 368 industry, such as collaborating in a field trial, could bias the physicians'  
37  
38  
39 369 prescription patterns in a manner that benefits the companies.<sup>10-15</sup> Oncologists in  
40  
41  
42 370 Japan handle extraordinary and very potent life-saving drugs, and have a  
43  
44  
45 371 degree of autonomy in their prescribing actions. Their decisions substantially  
46  
47  
48 372 influence the treatment and outcome for their patients, as well as having  
49  
50  
51 373 significant economic impact due to the high cost of anticancer medications.<sup>1-3</sup> It  
52  
53  
54 374 would therefore appear sensible to have rigorous regulations to cover the open  
55  
56  
57 375 and accessible reporting of any financial dealings between physicians and  
58  
59  
60

1  
2  
3  
4  
5  
6 376 pharmaceutical companies so as to avoid any potential nefarious or underhand  
7  
8  
9 377 behavior or undue pressure on physicians to alter their usual treatment practices.  
10  
11  
12 378 Indeed, it is possible that these highly-questionable arrangements may have  
13  
14  
15 379 contributed to the multiple cases of scientific misconduct that have recently been  
16  
17  
18 380 reported in Japan. The most infamous case was when employee misconduct  
19  
20  
21 381 was discovered in a series of clinical trials for Valsartan, an antihypertensive  
22  
23  
24 382 medication manufactured by Novartis Pharma, leading to a retraction of the  
25  
26  
27 383 associated academic papers.<sup>29 30</sup> A breast cancer clinical trial (CREATE-X trial)  
28  
29  
30 384 with a questionable pharmaceutical payment has also been identified.<sup>31 32</sup>  
31  
32  
33 385  
34  
35  
36 386 To prevent similar cases in future, we call for the implementation of a  
37  
38  
39 387 transparent, independent mechanism that would enable a comprehensive  
40  
41  
42 388 assessment of any and all payments being made by any pharmaceutical  
43  
44  
45 389 company to any individual physician or, for that matter, medical institution where  
46  
47  
48 390 the company's products may be used, and not just with respect to oncology.  
49  
50  
51 391 New schemes, such as the US's Open Payments, may prove successful but it is  
52  
53  
54 392 too soon to know.<sup>33</sup> The Disclosure UK mechanism may not prove so useful as it  
55  
56  
57 393 is voluntary. Additionally, given that such mechanisms allow for direct  
58  
59  
60



1  
2  
3  
4  
5  
6 394 comparison between what is allegedly paid and what is allegedly received, it will  
7  
8  
9 395 necessitate a fair, equitable and timely mechanism for dispute settlement,  
10  
11  
12 396 probably involving the use of third parties. <sup>32</sup>  
13  
14

15 397

17  
18 398 **Conclusion**

19  
20  
21 399 Japanese certified oncologists receive financial payments direct from  
22  
23  
24 400 pharmaceutical companies, usually from those active in the specialist field of the  
25  
26  
27 401 physician in question. This raises several queries with regard to ethical, medical  
28  
29  
30 402 and possibly legal issues. The value and speciality targets of the payments  
31  
32  
33 403 varied substantially which also raises yet more questions as to why. We believe  
34  
35  
36 404 that the lessons learned from our analyses should be shared among the global  
37  
38  
39 405 medical community to put in place safeguards to prevent undue and unethical  
40  
41  
42 406 inducements from the pharmaceutical industry and to help protect physicians  
43  
44  
45 407 from outside influences. It is essential to establish a robust, comprehensive and  
46  
47  
48 408 binding system for identifying and avoiding any and all potential conflicts of  
49  
50  
51 409 interest, of any nature, involving physicians or other medical professionals, both  
52  
53  
54 410 in Japan and internationally.  
55

56  
57 411  
58  
59  
60

1  
2  
3  
4  
5  
6  
7  
8  
9  
10  
11  
12  
13  
14  
15  
16  
17  
18  
19  
20  
21  
22  
23  
24  
25  
26  
27  
28  
29  
30  
31  
32  
33  
34  
35  
36  
37  
38  
39  
40  
41  
42  
43  
44  
45  
46  
47  
48  
49  
50  
51  
52  
53  
54  
55  
56  
57  
58  
59  
60

412 **Author contributors:**

413 A.O acquired, had full access to and control of all data, and oversaw all data  
414 analyses.

415 All authors were involved in the study concept and design:

416 All authors were involved in the analysis, interpretation of results and formation  
417 of conclusions

418 A.O. and A.C drafted the manuscript.

419

420 **Funding statement:**

421 The Medical Governance Research Institute (MEGRI) is a nonprofit enterprise,  
422 which receives donations from various organizations and individuals. Among the  
423 donors, Ain Pharmaciez Inc. belongs to the pharmaceutical industry. Waseda  
424 Chronicle, an independent non-profit news organization dedicated to  
425 investigative journalism, also contributed funding to this study. The funders  
426 made no contribution whatsoever to either the design of the study, the work  
427 carried out or the interpretation of the study findings.

428

429 **Conflict of interest statement**

1  
2  
3  
4  
5  
6 430 A.O and T.T receive personal fees from Medical Network Systems (MNES Inc.);  
7  
8  
9 431 H.S has received an honorarium from TAIHO Pharmaceutical Co., Ltd. for  
10  
11  
12 432 research outside the purview of work carried out during this study. All other  
13  
14  
15 433 authors declare no conflict of interests.  
16

17  
18 434

19  
20  
21 435 **Acknowledgements:**

22  
23  
24 436 The authors thank Dr. Masahiro Kami for his constructive opinions and insights  
25  
26  
27 437 and the Waseda Chronicle for extensive support.  
28

29  
30 438

31  
32  
33 439 **Data sharing statement:**

34  
35  
36 440 The datasets analysed during the current study are available from the  
37  
38  
39 441 corresponding author on reasonable request.  
40

41  
42 442

43  
44  
45 443 **Figure legends:**

46  
47  
48 444 **Figure 1. Distribution of payments to each subspecialty on an individual**

49  
50  
51 445 **company basis.** The companies and specialties are sorted in descending order  
52  
53  
54 446 with regard to payment value (proportionally expressed in the box height and  
55  
56  
57 447 band width in Figure 1). Band colour represents the payment destination  
58  
59  
60

1  
2  
3  
4  
5  
6 448 specialties. Due to space limitations, names of companies with payment values  
7  
8  
9 449 of less than ¥10 million [\$8,885] have been omitted.  
10  
11

12 450  
13  
14

15 451  
16  
17  
18  
19  
20  
21  
22  
23  
24  
25  
26  
27  
28  
29  
30  
31  
32  
33  
34  
35  
36  
37  
38  
39  
40  
41  
42  
43  
44  
45  
46  
47  
48  
49  
50  
51  
52  
53  
54  
55  
56  
57  
58  
59  
60

For peer review only

452

453

454

455

## References

- 456 1. Experts in Chronic Myeloid L. The price of drugs for chronic myeloid leukemia  
457 (CML) is a reflection of the unsustainable prices of cancer drugs: from the  
458 perspective of a large group of CML experts. *Blood* 2013;121:4439-42.  
459 doi: 10.1182/blood-2013-03-490003
- 460 2. Light DW, Kantarjian H. Market spiral pricing of cancer drugs. *Cancer*  
461 2013;119:3900-2. doi: 10.1002/cncr.28321
- 462 3. Kantarjian H, Rajkumar SV. Why are cancer drugs so expensive in the United  
463 States, and what are the solutions? *Mayo Clin Proc* 2015;90:500-4. doi:  
464 10.1016/j.mayocp.2015.01.014
- 465 4. Odell TW, Gregory MC. Cost of hypertension treatment. *J Gen Intern Med*  
466 1995;10:686-8.
- 467 5. Tibi-Levy Y, de Pouvourville G, Westerloppe J, et al. The cost of treating high  
468 blood pressure in general practice in France. *Eur J Health Econ*  
469 2008;9:229-36. doi: 10.1007/s10198-007-0065-2

- 1  
2  
3  
4  
5  
6  
7 470 6. Zhuo X, Zhang P, Kahn HS, et al. Change in medical spending attributable to  
8  
9 471 diabetes: national data from 1987 to 2011. *Diabetes Care* 2015;38:581-7.  
10  
11  
12 472 doi: 10.2337/dc14-1687  
13  
14  
15 473 7. Jemal A, Vinela P, Bray F, et al. The Cancer Atlas, 2nd Edition. GA: American  
16  
17  
18 474 Cancer Society 2014.  
19  
20  
21 475 8. Zafar SY, Peppercorn JM, Schrag D, et al. The financial toxicity of cancer  
22  
23  
24 476 treatment: a pilot study assessing out-of-pocket expenses and the  
25  
26  
27 477 insured cancer patient's experience. *Oncologist* 2013;18:381-90. doi:  
28  
29  
30 478 10.1634/theoncologist.2012-0279  
31  
32  
33 479 9. Bach PB, Giralt SA, Saltz LB. FDA Approval of Tisagenlecleucel: Promise and  
34  
35  
36 480 Complexities of a \$475000 Cancer Drug. *JAMA* 2017;318:1861-62. doi:  
37  
38  
39 481 10.1001/jama.2017.15218  
40  
41  
42 482 10. DeJong C, Aguilar T, Tseng CW, et al. Pharmaceutical Industry-Sponsored  
43  
44  
45 483 Meals and Physician Prescribing Patterns for Medicare Beneficiaries.  
46  
47  
48 484 *JAMA Intern Med* 2016;176:1114-22. doi:  
49  
50  
51 485 10.1001/jamainternmed.2016.2765  
52  
53  
54 486 11. De Ferrari A, Gentile C, Davalos L, et al. Attitudes and relationship between  
55  
56  
57 487 physicians and the pharmaceutical industry in a public general hospital in  
58  
59  
60

- 1  
2  
3  
4  
5  
6 488 Lima, Peru. *PLoS One* 2014;9:e100114. doi:  
7  
8  
9 489 10.1371/journal.pone.0100114  
10  
11  
12 490 12. Fickweiler F, Fickweiler W, Urbach E. Interactions between physicians and  
13  
14  
15 491 the pharmaceutical industry generally and sales representatives  
16  
17  
18 492 specifically and their association with physicians' attitudes and  
19  
20  
21 493 prescribing habits: a systematic review. *BMJ Open* 2017;7:e016408. doi:  
22  
23  
24 494 10.1136/bmjopen-2017-016408  
25  
26  
27 495 13. Riese F, Guloksuz S, Roventa C, et al. Pharmaceutical industry interactions  
28  
29  
30 496 of psychiatric trainees from 20 European countries. *Eur Psychiatry*  
31  
32  
33 497 2015;30:284-90. doi: 10.1016/j.eurpsy.2014.09.417  
34  
35  
36 498 14. Lee D, Begley CE. Physician report of industry gifts and quality of care.  
37  
38  
39 499 *Health Care Manage Rev* 2016;41:275-83. doi:  
40  
41  
42 500 10.1097/HMR.0000000000000042  
43  
44  
45 501 15. Montastruc F, Moulis G, Palmaro A, et al. Interactions between medical  
46  
47  
48 502 residents and drug companies: a national survey after the Mediator(R)  
49  
50  
51 503 affair. *PLoS One* 2014;9:e104828. doi: 10.1371/journal.pone.0104828  
52  
53  
54  
55  
56  
57  
58  
59  
60

- 1  
2  
3  
4  
5  
6 504 16. Mitchell AP, Basch EM, Dusetzina SB. Financial Relationships With Industry  
7  
8  
9 505 Among National Comprehensive Cancer Network Guideline Authors.  
10  
11  
12 506 *JAMA Oncol* 2016;2:1628-31. doi: 10.1001/jamaoncol.2016.2710  
13  
14  
15 507 17. Agrawal S, Brown D. The Physician Payments Sunshine Act--Two Years of  
16  
17  
18 508 the Open Payments Program. *N Engl J Med* 2016;374:906-9. doi:  
19  
20  
21 509 10.1056/NEJMp1509103  
22  
23  
24 510 18. Agrawal S, Brennan N, Budetti P. The Sunshine Act--effects on physicians.  
25  
26  
27 511 *N Engl J Med* 2013;368:2054-7. doi: 10.1056/NEJMp1303523  
28  
29  
30 512 19. IQVIA. Top 10 Pharmaceutical Markets Worldwide, 2017. Available from:  
31  
32  
33 513 <https://www.iqvia.com/-/media/iqvia/pdfs/canada-location-site/top10world>  
34  
35  
36 514 [widesales\\_en\\_17.pdf?la=en&hash=C1D59CB0CB2B060CF458F14CF53](https://www.iqvia.com/-/media/iqvia/pdfs/canada-location-site/top10world)  
37  
38  
39 515 [90D96F3B28238](https://www.iqvia.com/-/media/iqvia/pdfs/canada-location-site/top10world) accessed 16 October 2018.  
40  
41  
42 516 20. QuintilesIMS. Top 10 Pharmaceutical Markets Worldwide, 2016. Available  
43  
44  
45 517 from:  
46  
47  
48 518 <https://www.iqvia.com/-/media/iqvia/pdfs/canada-location-site/top-10-worl>  
49  
50  
51 519 [dwide-sales-en-2016.pdf](https://www.iqvia.com/-/media/iqvia/pdfs/canada-location-site/top-10-worl) accessed 2018 16 October.  
52  
53  
54  
55  
56  
57  
58  
59  
60



- 1  
2  
3  
4  
5  
6 520 21. Mix Online. Analysis of markets for oncology drugs in Japan. Available from:  
7  
8  
9 521 <https://www.mixonline.jp/Article/tabid/55/artid/59063/Default.aspx>  
10  
11  
12 522 accessed 16 October 2018.  
13  
14  
15 523 22. Japan Pharmaceutical Manufactures Association. The Transparency  
16  
17  
18 524 Guidelines for the Relations between Corporate Activities and Medical  
19  
20  
21 525 Institutions [Internet]. Available from:  
22  
23  
24 526 [http://www.jpma.or.jp/english/policies\\_guidelines/pdf/transparency\\_gl\\_int](http://www.jpma.or.jp/english/policies_guidelines/pdf/transparency_gl_int)  
25  
26  
27 527 [ro.pdf](#) accessed September 17 2018.  
28  
29  
30 528 23. National Tax Agency of Japan. Survey results of wages in 2013 (Japanese  
31  
32  
33 529 only). Available from:  
34  
35  
36 530 <https://www.nta.go.jp/information/release/kokuzeicho/2013/minkan/index>.  
37  
38  
39 531 [htm](#) accessed 8 July 2018.  
40  
41  
42 532 24. Riehmann P, Hanfler M, Froehlich B. Interactive sankey diagrams.  
43  
44  
45 533 Information Visualization, 2005 INFOVIS 2005 IEEE Symposium  
46  
47  
48 534 2005:233-40.  
49  
50  
51 535 25. Marshall DC, Jackson ME, Hattangadi-Gluth JA. Disclosure of Industry  
52  
53  
54 536 Payments to Physicians: An Epidemiologic Analysis of Early Data From  
55  
56  
57  
58  
59  
60

- 1  
2  
3  
4  
5  
6 537 the Open Payments Program. *Mayo Clin Proc* 2016;91:84-96. doi:  
7  
8  
9 538 10.1016/j.mayocp.2015.10.016  
10  
11  
12 539 26. Waseda Chronicle. Pharmaceutical payment and physicians. Available from:  
13  
14  
15 540 <http://www.wasedachronicle.org/articles/docyens/e2/> accessed 16  
16  
17  
18 541 October 2018.  
19  
20  
21 542 27. Ismaila N, Salako O, Mutiu J, et al. Oncology Guidelines Usage in a Low-  
22  
23  
24 543 and Middle-Income Country. *J Glob Oncol* 2018:1-6. doi:  
25  
26  
27 544 10.1200/JGO.17.00136  
28  
29  
30 545 28. Sony Life Insurance Co. L. Operation counts of cancer in Japanese hospitals.  
31  
32  
33 546 Available from:  
34  
35  
36 547 <https://cs.sonylife.co.jp/lpv/pcms/sca/ct/medical/ranking-cancer/02.html?pk=>  
37  
38  
39 548 [pk=](#) accessed 16 October 2018.  
40  
41  
42 549 29. Lancet, Editors. Retraction--Valsartan in a Japanese population with  
43  
44  
45 550 hypertension and other cardiovascular disease (Jikei Heart Study): a  
46  
47  
48 551 randomised, open-label, blinded endpoint morbidity-mortality study.  
49  
50  
51 552 *Lancet* 2013;382:843. doi: 10.1016/S0140-6736(13)61847-4  
52  
53  
54 553 30. Narumi H, Takano H, Shindo S, et al. Retraction: Effects of valsartan and  
55  
56  
57 554 amlodipine on cardiorenal protection in Japanese hypertensive patients:  
58  
59  
60

- 1  
2  
3  
4  
5  
6 555 the Valsartan Amlodipine Randomized Trial. *Hypertens Res* 2017;40:103.  
7  
8  
9 556 doi: 10.1038/hr.2016.144  
10  
11  
12 557 31. Ozaki A. Conflict of Interest and the CREATE-X Trial in the New England  
13  
14  
15 558 Journal of Medicine. *Sci Eng Ethics* 2017 doi:  
16  
17  
18 559 10.1007/s11948-017-9966-3  
19  
20  
21 560 32. Ozaki A, Takita M, Tanimoto T. A call for improved transparency in financial  
22  
23  
24 561 aspects of clinical trials: a case study of the CREATE-X trial in the New  
25  
26  
27 562 England Journal of Medicine. *Invest New Drugs* 2018;36:517-22. doi:  
28  
29  
30 563 10.1007/s10637-018-0577-x  
31  
32  
33 564 33. Centers for Medicare & Medicaid. OpenPaymentData.CMS.gov. Available  
34  
35  
36 565 from: <https://openpaymentsdata.cms.gov/> accessed 17 September 2018.  
37  
38  
39  
40  
41  
42 567

568 **Table 1. Characteristics of oncology specialists and pharmaceutical**  
 569 **payment received by individual doctors.**

| Variable                                                     |             |
|--------------------------------------------------------------|-------------|
| <u>1. Characteristics of oncology specialists (N=1081)</u>   |             |
| Working institutions                                         | (N (%))     |
| University hospitals                                         | 315 (29.1)  |
| Cancer hospitals                                             | 142 (13.1)  |
| Other general hospitals                                      | 407 (37.7)  |
| Undisclosed                                                  | 217 (20.1)  |
| Working regions                                              | (N, %)      |
| Hokkaido                                                     | 52 (4.8)    |
| Tohoku                                                       | 54 (5.0)    |
| Kanto                                                        | 311 (28.8)  |
| Chubu                                                        | 191 (19.4)  |
| Kinki                                                        | 210 (19.4)  |
| Chugoku                                                      | 84 (7.8)    |
| Shikoku                                                      | 44 (4.1)    |
| Kyushu                                                       | 135 (12.5)  |
| Year of certification                                        | (N, %)      |
| 2006                                                         | 45 (4.2)    |
| 2007                                                         | 77 (7.1)    |
| 2008                                                         | 72 (6.7)    |
| 2009                                                         | 98 (9.1)    |
| 2010                                                         | 133 (12.3)  |
| 2011                                                         | 130 (12.0)  |
| 2012                                                         | 124 (11.5)  |
| 2013                                                         | 143 (13.2)  |
| 2014                                                         | 98 (9.1)    |
| 2015                                                         | 85 (7.9)    |
| 2016                                                         | 76 (7.0)    |
| <u>2. Characteristics of pharmaceutical company payments</u> |             |
| Monetary value of payment                                    |             |
| Total payment (¥)                                            | 598,286,743 |

|                                                |        |                     |
|------------------------------------------------|--------|---------------------|
| Mean monetary value (¥, standard deviation)    |        | 553,457 (1,264,398) |
| Median monetary value (¥, Interquartile range) |        | 122,507 (0–445,480) |
| <b>Number of payments</b>                      |        |                     |
| Total count                                    |        | 7,445               |
| Mean count (standard deviation)                |        | 7 (13)              |
| Median count (Interquartile range)             |        | 2 (0–7)             |
| Number of oncology specialists with payment    | (N, %) | (N=1081)            |
| Any                                            |        | 779 (72.1)          |
| ¥1 million or above                            |        | 147 (13.6)          |
| ¥5 million or above                            |        | 20 (1.9)            |
| ¥10 million or above                           |        | 3 (0.2)             |

570

571

572 **Table 2. Companies making a payment to oncology specialists**

| Company name                          | Monetary Value (¥) |
|---------------------------------------|--------------------|
| Chugai Pharmaceutical Co., Ltd.       | 103,727,395        |
| AstraZeneca plc                       | 53,142,723         |
| Taiho Pharmaceutical Co., Ltd.        | 51,135,629         |
| Ono Pharmaceutical Co., Ltd.          | 48,655,875         |
| Eli Lilly Japan K.K.                  | 44,825,340         |
| Bristol-Myers Squibb                  | 33,443,966         |
| Takeda Pharmaceutical Co., Ltd.       | 28,280,960         |
| Novartis International AG             | 26,813,551         |
| Nippon Boehringer Ingelheim Co., Ltd. | 26,071,503         |
| Kyowa Hakko Kirin Co., Ltd.           | 21,861,357         |
| Pfizer Inc.                           | 20,606,008         |
| Merck Serono                          | 16,411,157         |
| Eisai Co., Ltd.                       | 16,342,547         |
| Celgene Corporation                   | 15,207,296         |
| Mitsubishi Tanabe Pharma Corporation  | 11,970,589         |
| Daiichi Sankyo Co., Ltd.              | 8,827,786          |
| Yakult Honsha Co., Ltd.               | 8,318,026          |
| Janssen Pharmaceutical K.K.           | 7,667,831          |
| MSD K.K.,                             | 6,317,468          |
| Sumitomo Dainippon Pharma Co., Ltd.   | 5,196,201          |
| Bayer AG                              | 4,562,759          |
| Nippon Kayaku Co., Ltd.               | 3,579,218          |
| Sanofi K.K.                           | 3,535,000          |
| Astellas Pharma Inc.                  | 3,510,000          |
| Nippon Shinyaku Co., Ltd.             | 3,129,497          |
| Asahi Kasei Pharma Corporation        | 3,102,452          |
| Otsuka Pharmaceutical Co., Ltd.       | 2,204,198          |
| Teijin Pharma Limited                 | 2,099,790          |
| Shionogi & Co., Ltd.                  | 2,052,088          |
| Kyorin Pharmaceutical Co.,LTD.        | 1,948,969          |

|                                     |           |
|-------------------------------------|-----------|
| Zeria Pharmaceutical Co., Ltd.      | 1,893,290 |
| Tsumura & Co.                       | 1,626,003 |
| Kissei Pharmaceutical Co., Ltd.     | 1,236,210 |
| Terumo Corporation                  | 1,214,840 |
| Meiji Seika                         | 1,000,264 |
| AbbVie GK                           | 924,371   |
| Sanwa Kagaku Kenkyusho Co., Ltd.    | 890,960   |
| EA Pharma Co.,Ltd.                  | 783,712   |
| Kowa Company, Limited               | 590,262   |
| Hisamitsu Pharmaceutical Co., Inc.  | 539,030   |
| Novo Nordisk Pharma Ltd.            | 536,233   |
| Aska Pharmaceutical Co., Ltd.       | 423,206   |
| Nihon Pharmaceutical Co., Ltd.      | 311,836   |
| Nippon Chemiphar Co., Ltd.          | 278,425   |
| Kracie Pharmaceutical, Ltd.         | 268,112   |
| Ayumi Pharmaceutical Corporation    | 226,864   |
| Mylan N. V.                         | 206,240   |
| Torii Pharmaceutical Co., Ltd.      | 205,380   |
| Kaken Pharmaceutical Co., Ltd.      | 111,370   |
| GlaxoSmithKline plc                 | 111,370   |
| Minophagen Pharmaceutical Co., Ltd. | 110,440   |
| Mochida Pharmaceutical Co., Ltd.    | 89,096    |
| Toray Industries, Inc.              | 77,080    |
| Santen Pharmaceutical Co., Ltd.     | 51,560    |
| Toyama Chemical Co., Ltd.           | 33,410    |

573

574 **Table 3. Characteristics of oncology specialists (receiving ¥1 million or**  
 575 **more) and pharmaceutical company payments received by this group in**  
 576 **2016**

| Variable                                                  |               |
|-----------------------------------------------------------|---------------|
| <b>1. Characteristics of oncology specialists (N=147)</b> |               |
| <b>Working institutions</b>                               | <b>(N, %)</b> |
| University hospitals                                      | 74 (50.3)     |
| Cancer hospitals                                          | 40 (27.2)     |
| Other general hospitals                                   | 24 (16.3)     |
| Nondisclosed                                              | 9 (6.1)       |
| <b>Working regions</b>                                    | <b>(N, %)</b> |
| Hokkaido                                                  | 4 (2.7)       |
| Tohoku                                                    | 11 (7.5)      |
| Kanto                                                     | 51 (34.7)     |
| Chubu                                                     | 25 (17.0)     |
| Kinki                                                     | 29 (19.7)     |
| Chugoku                                                   | 8 (5.4)       |
| Shikoku                                                   | 5 (3.4)       |
| Kyushu                                                    | 14 (9.5)      |
| <b>Year of certification</b>                              | <b>(N, %)</b> |
| 2006                                                      | 22 (15.0)     |
| 2007                                                      | 17 (11.6)     |
| 2008                                                      | 20 (13.6)     |
| 2009                                                      | 21 (14.3)     |
| 2010                                                      | 23 (15.7)     |
| 2011                                                      | 16 (10.9)     |
| 2012                                                      | 9 (6.1)       |
| 2013                                                      | 9 (6.1)       |
| 2014                                                      | 5 (3.4)       |
| 2015                                                      | 2 (1.4)       |
| 2016                                                      | 3 (2.0)       |
| <b>Subspecialty of oncologists</b>                        | <b>(N, %)</b> |
| Respiratory                                               | 56 (38.1)     |



|                  |           |
|------------------|-----------|
| Gastroenterology | 36 (24.5) |
| Hematology       | 27 (18.4) |
| Breast           | 16 (10.9) |
| Head and neck    | 2 (1.4)   |
| Urology          | 1 (0.7)   |
| Other            | 9 (6.1)   |

## 2. Characteristics of pharmaceutical payments of ¥1 million or more(N=147)

### Monetary value of payment

|                                                |                                 |
|------------------------------------------------|---------------------------------|
| Total value (¥)                                | 433,622,808                     |
| Mean monetary value (¥, standard deviation)    | 2,949,815 (2,191,330)           |
| Median monetary value (¥, Interquartile range) | 2,179,352 (1,420,764–3,721,350) |

### Number of payments

|                                    |            |
|------------------------------------|------------|
| Total count                        | 4,606      |
| Mean count (standard deviation)    | 31 (21)    |
| Median count (Interquartile range) | 24 (17–39) |

### Monetary value of payment according to subspecialties (¥, %)

|                  |                    |
|------------------|--------------------|
| Respiratory      | 177,274,111 (40.9) |
| Gastroenterology | 100,424,612 (23.2) |
| Hematology       | 81,649,310 (18.8)  |
| Breast           | 39,866,093 (9.2)   |
| Urology          | 6,901,237 (1.6)    |
| Head and neck    | 5,998,785 (1.4)    |
| Other            | 21,508,660 (5.0)   |

577

578

579 **Table 4. Multivariate regression models for the monetary value of payment**580 **on an individual basis**

| Variable                                     | All (N=1081)<br>IRR (95% CI) | ≥ ¥1 million (N=147)<br>IRR (95% CI) |
|----------------------------------------------|------------------------------|--------------------------------------|
| Year of experience after board certification | 1.30 (1.23–1.37)***          | 1.09 (1.01–1.17)*                    |
| <b>Institution</b>                           |                              |                                      |
| Other type of medical institutions           | Ref.                         | Ref.                                 |
| University hospitals                         | 2.43 (1.78–3.31)***          | 1.62 (1.16–2.27)**                   |
| <b>Working region</b>                        |                              |                                      |
| Kanto                                        | Ref.                         | Ref.                                 |
| Hokkaido                                     | 0.44 (0.18–1.08)             | 0.62 (0.25–1.52)                     |
| Tohoku                                       | 1.01 (0.56–1.81)             | 1.13 (0.67–1.90)                     |
| Chubu                                        | 0.65 (0.42–1.01)             | 0.67 (0.40–1.11)                     |
| Kinki                                        | 0.71 (0.47–1.06)             | 0.96 (0.62–1.50)                     |
| Chugoku                                      | 0.58 (0.26–1.30)             | 0.91 (0.37–2.22)                     |
| Shikoku                                      | 0.89 (0.43–1.87)             | 1.60 (0.86–2.99)                     |
| Kyushu                                       | 0.88 (0.54–1.44)             | 1.28 (0.71–2.32)                     |
| <b>Subspecialty</b>                          |                              |                                      |
| Respiratory                                  |                              | Ref.                                 |
| Gastroenterology                             |                              | 0.72 (0.47–1.10)                     |
| Hematology                                   |                              | 0.96 (0.67–1.38)                     |
| Breast                                       |                              | 0.68 (0.39–1.20)                     |
| Other <sup>†</sup>                           |                              | 0.90 (0.42–1.92)                     |

581 † Other subspecialties included Urology and Head and neck cancer. Due to the

582 small number of physicians in these two subspecialties, they were included in

583 the “other” category.

584 IRR=Incidence rate ratio, CI=Confidence interval

585 \* <0.05, \*\* <0.01, \*\*\* <0.001

1  
2  
3  
4  
5  
6  
7  
8  
9  
10  
11  
12  
13  
14  
15  
16  
17  
18  
19  
20  
21  
22  
23  
24  
25  
26  
27  
28  
29  
30  
31  
32  
33  
34  
35  
36  
37  
38  
39  
40  
41  
42  
43  
44  
45  
46  
47  
48  
49  
50  
51  
52  
53  
54  
55  
56  
57  
58  
59  
60

For peer review only

**Table 5. List of oncology drugs with Japanese domestic sales of at least ¥5 billion in 2016**

| Company name                    | Drug name                  | 2016 Sales (Billion, ¥) | Respiratory | Gastroenterology | Hematology | Breast | Urology | Head and neck | Other |
|---------------------------------|----------------------------|-------------------------|-------------|------------------|------------|--------|---------|---------------|-------|
| Chugai Pharmaceutical Co., Ltd. | Bevacizumab                | 92.1                    | Yes         | Yes              | No         | Yes    | No      | No            | Yes   |
| Chugai Pharmaceutical Co., Ltd. | Trastuzumab                | 34.1                    | No          | Yes              | No         | Yes    | No      | No            | No    |
| Chugai Pharmaceutical Co., Ltd. | Rituximab                  | 32.1                    | No          | No               | Yes        | No     | No      | No            | No    |
| Chugai Pharmaceutical Co., Ltd. | Capecitabine               | 12.3                    | No          | Yes              | No         | Yes    | No      | No            | No    |
| Chugai Pharmaceutical Co., Ltd. | Pertuzumab                 | 11.9                    | No          | No               | No         | Yes    | No      | No            | No    |
| Chugai Pharmaceutical Co., Ltd. | Alectinib                  | 11.9                    | Yes         | No               | No         | No     | No      | No            | No    |
| Chugai Pharmaceutical Co., Ltd. | Erlotinib                  | 11.5                    | Yes         | Yes              | No         | No     | No      | No            | No    |
| Chugai Pharmaceutical Co., Ltd. | Trastuzumab Emtansine      | 8.3                     | No          | No               | No         | Yes    | No      | No            | No    |
| Ono Pharmaceutical Co., Ltd.    | Nivolumab                  | 103.9                   | Yes         | No               | No         | No     | No      | No            | Yes   |
| Eli Lilly Japan K.K.            | Pemetrexed                 | 37.3                    | Yes         | No               | No         | No     | No      | No            | No    |
| Eli Lilly Japan K.K.            | Ramucirumab                | 28.9                    | Yes         | Yes              | No         | No     | No      | No            | No    |
| Taiho Pharmaceutical Co., Ltd.  | Tegafur/Gimeracil/Oteracil | 26.9                    | Yes         | Yes              | No         | Yes    | No      | Yes           | No    |
| Taiho Pharmaceutical Co., Ltd.  | nab-Paclitaxel             | 20.7                    | Yes         | Yes              | No         | Yes    | No      | No            | No    |
| Taiho Pharmaceutical Co., Ltd.  | Calcium Folate             | 9.7                     | No          | Yes              | No         | No     | No      | No            | No    |
| Taiho Pharmaceutical Co., Ltd.  | Tegafur, Uracil            | 6.5                     | Yes         | Yes              | No         | Yes    | Yes     | Yes           | Yes   |
| Takeda Pharmaceutical Co., Ltd. | Panitumumab                | 18.8                    | No          | Yes              | No         | No     | No      | No            | No    |
| Takeda Pharmaceutical Co., Ltd. | Leuprorelin                | 48.6                    | No          | No               | No         | Yes    | Yes     | No            | No    |
| Novartis International AG       | Imatinib                   | 27.5                    | No          | Yes              | Yes        | No     | No      | No            | No    |
| Novartis International AG       | Nilotinib                  | 20.7                    | No          | No               | Yes        | No     | No      | No            | No    |
| Novartis International AG       | Everolimus                 | 15.1                    | Yes         | Yes              | No         | Yes    | Yes     | No            | No    |

1  
2  
3  
4  
5  
6  
7  
8  
9  
10  
11  
12  
13  
14  
15  
16  
17  
18  
19  
20  
21  
22  
23  
24  
25  
26  
27  
28  
29  
30  
31  
32  
33  
34  
35  
36  
37  
38  
39  
40  
41  
42  
43  
44  
45  
46

|                                       |             |      |     |     |     |     |     |     |     |     |
|---------------------------------------|-------------|------|-----|-----|-----|-----|-----|-----|-----|-----|
| Nippon Boehringer Ingelheim Co., Ltd. | Afatinib    | 8.7  | Yes | No  |
| Eisai Co., Ltd.                       | Eribulin    | 7.8  | No  | No  | No  | Yes | No  | No  | No  | Yes |
| Yakult Honsha Co., Ltd.               | Oxaliplatin | 18.4 | No  | Yes | No  | No  | No  | No  | No  | No  |
| Daiichi Sankyo Co., Ltd.              | Denosumab   | 13.9 | Yes |

For peer review only

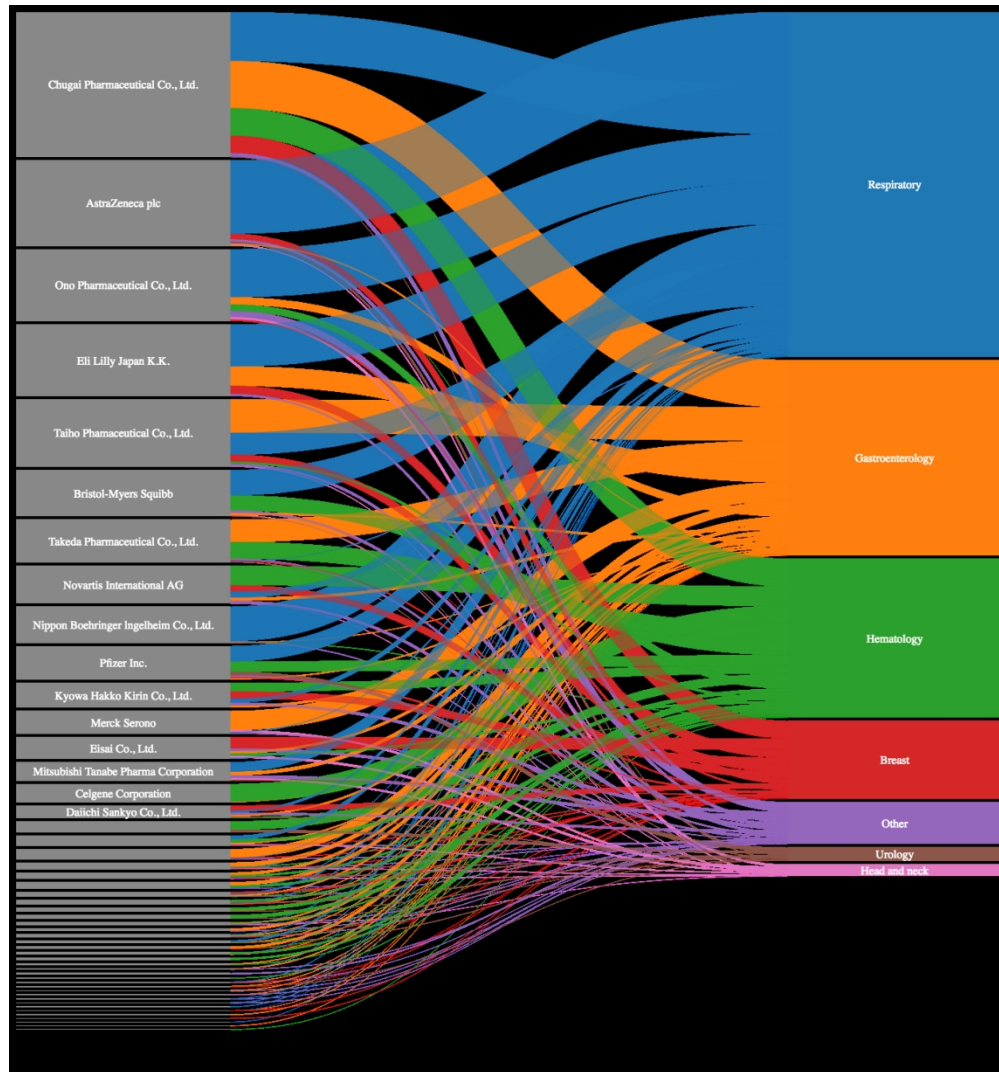

**Figure 1. Distribution of payments to each subspecialty on an individual company basis.** The companies and specialties are sorted in descending order with regard to payment value (proportionally expressed in the box height and band width in Figure 1). Band colour represents the payment destination specialties. Due to space limitations, names of companies with payment values of less than ¥10 million [\$8,885] have been omitted.

493x529mm (72 x 72 DPI)

**Supplementary Material 1. 71 pharmaceutical companies sampled and the starting and ending date of the period when the payment data was disclosed**

| Pharmaceutical company                | Period of the payment data in 2016 |                    |
|---------------------------------------|------------------------------------|--------------------|
|                                       | Starting date                      | Ending date        |
| Maruho Co., Ltd.,                     | October 1, 2016                    | September 30, 2017 |
| Shire Japan KK,                       | January 1, 2016                    | December 31, 2016  |
| Fuso Pharmaceutical Industries, Ltd., | April 1, 2016                      | March 31, 2017     |
| POLA-Pharma.,                         | January 1, 2016                    | December 31, 2016  |
| Nippon Zoki Pharmaceutical Co., Ltd., | April 1, 2016                      | March 31, 2017     |
| Nippon Kayaku Co., Ltd.               | April 1, 2016                      | March 31, 2017     |
| Kowa Company. Ltd.,                   | April 1, 2016                      | March 31, 2017     |
| Kracle Holdings, Ltd.,                | January 1, 2016                    | December 31, 2016  |
| Fujimoto Pharmaceutical Corporation,  | July 1, 2016                       | June 30, 2017      |
| Kyoto Pharmaceutical Industries, Ltd. | June 1, 2016                       | May 31, 2017       |
| Merck Serono Co., Ltd.,               | January 1, 2016                    | December 31, 2016  |
| Nippon Chemiphar Co., Ltd.,           | January 1, 2016                    | December 31, 2016  |
| TOYAMA CHEMICAL CO., LTD.,            | April 1, 2016                      | March 31, 2017     |
| Bayer Yakuhin, Ltd.,                  | January 1, 2016                    | December 31, 2016  |
| UCB Japan Co., Ltd.,                  | January 1, 2016                    | December 31, 2016  |
| AYUMI Pharmaceutical Corporation,     | April 1, 2016                      | March 31, 2017     |
| CELGENE CORPORATION,                  | January 1, 2016                    | December 31, 2016  |
| Senju Pharmaceutical Co., Ltd.        | April 1, 2016                      | March 31, 2017     |
| Bristol-Myers Squibb K.K,             | April 1, 2016                      | March 31, 2017     |
| TOA EIYO LTD,                         | April 1, 2016                      | March 31, 2017     |
| TSUMURA & CO.,                        | April 1, 2016                      | March 31, 2017     |
| Toray Industries, Inc.,               | April 1, 2016                      | March 31, 2017     |
| TERUMO CORPORATION,                   | April 1, 2016                      | March 31, 2017     |
| SEIKAGAKU CORPORATION,                | April 1, 2016                      | March 31, 2017     |
| Teikoku Seiyaku Co., Ltd.,            | January 1, 2016                    | December 31, 2016  |

|    |                                        |                 |                   |
|----|----------------------------------------|-----------------|-------------------|
| 1  |                                        |                 |                   |
| 2  |                                        |                 |                   |
| 3  |                                        |                 |                   |
| 4  |                                        |                 |                   |
| 5  |                                        |                 |                   |
| 6  | ASAHI KASEI PHARMA CORPORATION,        | April 1, 2016   | March 31, 2017    |
| 7  | Wakamoto Pharmaceutical Co., Ltd.,     | April 1, 2016   | March 31, 2017    |
| 8  |                                        |                 |                   |
| 9  | MOCHIDA PHARMACEUTICAL CO., LTD.,      | April 1, 2016   | March 31, 2017    |
| 10 |                                        |                 |                   |
| 11 | Santen Pharmaceutical Co., Ltd.,       | April 1, 2016   | March 31, 2017    |
| 12 |                                        |                 |                   |
| 13 | Mylan Seiyaku Ltd.,                    | January 1, 2016 | December 31, 2016 |
| 14 |                                        |                 |                   |
| 15 | Yakult Honsha Company, Limited.,       | April 1, 2016   | March 31, 2017    |
| 16 |                                        |                 |                   |
| 17 | Minophagen Pharmaceutical Co.,         | April 1, 2016   | March 31, 2017    |
| 18 |                                        |                 |                   |
| 19 | Taisho Pharmaceutical Co., Ltd.,       | April 1, 2016   | March 31, 2017    |
| 20 |                                        |                 |                   |
| 21 | ASKA Pharmaceutical Co., Ltd.          | April 1, 2016   | March 31, 2017    |
| 22 |                                        |                 |                   |
| 23 | Meiji Seika Pharma Co., Ltd.,          | April 1, 2016   | March 31, 2017    |
| 24 |                                        |                 |                   |
| 25 | NIHON PHARMACEUTICAL CO., LTD.,        | April 1, 2016   | March 31, 2017    |
| 26 |                                        |                 |                   |
| 27 | Maruishi Pharmaceutical Co., Ltd.,     | April 1, 2016   | March 31, 2017    |
| 28 |                                        |                 |                   |
| 29 | KYORIN Pharmaceutical Co., Ltd.,       | April 1, 2016   | March 31, 2017    |
| 30 |                                        |                 |                   |
| 31 | TEIJIN PHARMA LIMITED.,                | April 1, 2016   | March 31, 2017    |
| 32 |                                        |                 |                   |
| 33 | ZERIA Pharmaceutical Co., Ltd.,        | April 1, 2016   | March 31, 2017    |
| 34 |                                        |                 |                   |
| 35 | SANWA KAGAKU KENKYUSHO CO., LTD.,      | April 1, 2016   | March 31, 2017    |
| 36 |                                        |                 |                   |
| 37 | Kaken Pharmaceutical Co., Ltd.,        | April 1, 2016   | March 31, 2017    |
| 38 |                                        |                 |                   |
| 39 | Hisamitsu Pharmaceutical Co., Inc.,    | March 1, 2016   | February 28, 2017 |
| 40 |                                        |                 |                   |
| 41 | Sanofi K.K.,                           | January 1, 2016 | December 31, 2016 |
| 42 |                                        |                 |                   |
| 43 | EA Pharma Co., Ltd.,                   | April 1, 2016   | March 31, 2017    |
| 44 |                                        |                 |                   |
| 45 | Nippon Boehringer Ingelheim Co., Ltd., | January 1, 2016 | December 31, 2016 |
| 46 |                                        |                 |                   |
| 47 | Torii Pharmaceutical Co., Ltd.,        | January 1, 2016 | December 31, 2016 |
| 48 |                                        |                 |                   |
| 49 | AstraZeneca plc                        | January 1, 2016 | December 31, 2016 |
| 50 |                                        |                 |                   |
| 51 | Sumitomo Dainippon Pharma Co., Ltd.,   | April 1, 2016   | March 31, 2017    |
| 52 |                                        |                 |                   |
| 53 | Novartis Pharma K.K.,                  | January 1, 2016 | December 31, 2016 |
| 54 |                                        |                 |                   |
| 55 | Eli Lilly Japan K.K.,                  | January 1, 2016 | December 31, 2016 |
| 56 |                                        |                 |                   |
| 57 | ONO PHARMACEUTICAL CO., LTD.,          | April 1, 2016   | March 31, 2017    |
| 58 |                                        |                 |                   |
| 59 | Kissei Pharmaceutical Co., Ltd.,       | April 1, 2016   | March 31, 2017    |
| 60 |                                        |                 |                   |
|    | Eisai Co., Ltd.,                       | January 1, 2016 | December 31, 2016 |



|    |                                            |                  |                   |
|----|--------------------------------------------|------------------|-------------------|
| 1  |                                            |                  |                   |
| 2  |                                            |                  |                   |
| 3  |                                            |                  |                   |
| 4  |                                            |                  |                   |
| 5  |                                            |                  |                   |
| 6  | NIPPON SHINYAKU CO., LTD.,                 | April 1, 2016    | March 31, 2017    |
| 7  | AbbVie GK,                                 | January 1, 2016  | December 31, 2016 |
| 8  | Mitsubishi Tanabe Pharma Corporation,      | April 1, 2016    | March 31, 2017    |
| 9  | Research Institute for Microbial Diseases, | April 1, 2016    | March 31, 2017    |
| 10 | MSD K.K.,                                  | January 1, 2016  | December 31, 2016 |
| 11 | Janssen Pharmaceutical K.K.,               | January 1, 2016  | December 31, 2016 |
| 12 | Kyowa Hakko Kirin Company, Limited,        | January 1, 2016  | December 31, 2016 |
| 13 | Takeda Pharmaceutical Company Limited.,    | April 1, 2016    | March 31, 2017    |
| 14 | TAIHO PHARMACEUTICAL CO., LTD.,            | January 1, 2016  | December 31, 2016 |
| 15 | Otsuka Pharmaceutical Co., Ltd.,           | January 1, 2016  | December 31, 2016 |
| 16 | DAIICHI SANKYO COMPANY, LIMITED.,          | April 1, 2016    | March 31, 2017    |
| 17 | GlaxoSmithKline K.K.,                      | January 1, 2016  | December 31, 2016 |
| 18 | Shionogi & Co., Ltd.,                      | April 1, 2016    | March 31, 2017    |
| 19 | Chugai Pharmaceutical Co., Ltd.,           | January 1, 2016  | December 31, 2016 |
| 20 | Novo Nordisk Pharma Ltd.,                  | January 1, 2016  | December 31, 2016 |
| 21 | Astellas Pharma Inc.,                      | April 1, 2016    | March 31, 2017    |
| 22 | Pfizer Japan Inc.,                         | December 1, 2015 | November 30, 2016 |
| 23 |                                            |                  |                   |
| 24 |                                            |                  |                   |
| 25 |                                            |                  |                   |
| 26 |                                            |                  |                   |
| 27 |                                            |                  |                   |
| 28 |                                            |                  |                   |
| 29 |                                            |                  |                   |
| 30 |                                            |                  |                   |
| 31 |                                            |                  |                   |
| 32 |                                            |                  |                   |
| 33 |                                            |                  |                   |
| 34 |                                            |                  |                   |
| 35 |                                            |                  |                   |
| 36 |                                            |                  |                   |
| 37 |                                            |                  |                   |
| 38 |                                            |                  |                   |
| 39 |                                            |                  |                   |
| 40 |                                            |                  |                   |
| 41 |                                            |                  |                   |
| 42 |                                            |                  |                   |
| 43 |                                            |                  |                   |
| 44 |                                            |                  |                   |
| 45 |                                            |                  |                   |
| 46 |                                            |                  |                   |
| 47 |                                            |                  |                   |
| 48 |                                            |                  |                   |
| 49 |                                            |                  |                   |
| 50 |                                            |                  |                   |
| 51 |                                            |                  |                   |
| 52 |                                            |                  |                   |
| 53 |                                            |                  |                   |
| 54 |                                            |                  |                   |
| 55 |                                            |                  |                   |
| 56 |                                            |                  |                   |
| 57 |                                            |                  |                   |
| 58 |                                            |                  |                   |
| 59 |                                            |                  |                   |
| 60 |                                            |                  |                   |

1  
2  
3  
4  
5 **Supplementary Material 2. Monetary value of payment (¥) in each company according to oncology subspecialty**

| 6 Company name                                 | Respiratory | Gastroenterology | Hematology | Breast    | Urology   | Head and neck | Other     | All        |
|------------------------------------------------|-------------|------------------|------------|-----------|-----------|---------------|-----------|------------|
| 8 Chugai Pharmaceutical Co., Ltd.              | 25,061,169  | 24,264,112       | 14,242,968 | 8,958,305 | 229,104   | 0             | 1,787,018 | 74,542,676 |
| 9<br>10 AstraZeneca plc                        | 37,680,325  | 662,651          | 55,685     | 2,770,885 | 890,960   | 456,618       | 1,319,735 | 43,836,859 |
| 11 Ono Pharmaceutical Co., Ltd.                | 24,623,912  | 3,718,073        | 3,396,785  | 890,961   | 0         | 1147112       | 3,129,497 | 36,906,340 |
| 12<br>13 Eli Lilly Japan K.K.                  | 21,566,802  | 9,944,828        | 0          | 4,145,014 | 0         | 0             | 1,046,878 | 36,703,522 |
| 14<br>15 Taiho Pharmaceutical Co., Ltd.        | 11,248,370  | 17,134,599       | 1,202,796  | 3,530,431 | 0         | 222740        | 1,147,111 | 34,486,047 |
| 16<br>17 Bristol-Myers Squibb                  | 13,019,156  | 1,058,015        | 7,735,684  | 33,411    | 278,426   | 300,699       | 1,314,166 | 23,739,557 |
| 18 Takeda Pharmaceutical Co., Ltd.             | 411,752     | 11,462,655       | 8,531,978  | 523,439   | 171,829   | 0             | 798,682   | 21,900,335 |
| 19<br>20 Novartis International AG             | 3,140,636   | 1,525,769        | 9,913,984  | 3,306,435 | 0         | 77,959        | 1,299,619 | 19,264,402 |
| 21<br>22 Nippon Boehringer Ingelheim Co., Ltd. | 17,652,164  | 111,370          | 211,370    | 0         | 0         | 0             | 445,480   | 18,420,384 |
| 23<br>24 Pfizer Inc.                           | 7,840,157   | 607,127          | 5,257,311  | 764,319   | 1,832,840 | 0             | 767,502   | 17,069,256 |
| 25<br>26 Kyowa Hakko Kirin Co., Ltd.           | 2,082,619   | 1,046,878        | 4,359,554  | 3,669,644 | 0         | 0             | 1,503,500 | 12,662,195 |
| 27<br>28 Merck Serono                          | 467,754     | 9,722,368        | 0          | 33,411    | 0         | 946,645       | 412,069   | 11,582,247 |
| 29<br>30 Eisai Co., Ltd.                       | 445,480     | 1,191,660        | 1,180,522  | 5,791,243 | 0         | 1135975       | 1,380,988 | 11,125,868 |
| 31<br>32 Mitsubishi Tanabe Pharma Corporation  | 4,844,593   | 1,780,235        | 44,548     | 389,795   | 0         | 813,002       | 1,458,947 | 9,331,120  |
| 33<br>34 Celgene Corporation                   | 0           | 103,120          | 9,085,712  | 0         | 0         | 0             | 0         | 9,188,832  |
| 35<br>36 Daiichi Sankyo Co., Ltd.              | 1,124,842   | 915,086          | 222,740    | 2,615,204 | 389,796   | 0             | 1,084,466 | 6,352,134  |
| 37<br>38 Janssen Pharmaceutical K.K.           | 0           | 0                | 4,276,610  | 0         | 1,252,917 | 0             | 0         | 5,529,527  |
| 39<br>40 MSD K.K.                              | 1,901,643   | 545,715          | 1,748,510  | 278,425   | 0         | 529,009       | 111,370   | 5,114,672  |
| 41<br>42 Yakult Honsha Co., Ltd.               | 288,740     | 4,248,928        | 0          | 381,548   | 0         | 0             | 175,306   | 5,094,522  |

|    |                                     |         |           |           |         |         |         |         |           |
|----|-------------------------------------|---------|-----------|-----------|---------|---------|---------|---------|-----------|
| 1  |                                     |         |           |           |         |         |         |         |           |
| 2  |                                     |         |           |           |         |         |         |         |           |
| 3  |                                     |         |           |           |         |         |         |         |           |
| 4  |                                     |         |           |           |         |         |         |         |           |
| 5  | Bayer AG                            | 155,918 | 1,971,249 | 356,384   | 55,685  | 222,740 | 222,740 | 278,425 | 3,263,141 |
| 6  | Sanofi K.K.                         | 0       | 1,250,000 | 890,000   | 325,000 | 550,000 | 100000  | 50,000  | 3,165,000 |
| 7  |                                     |         |           |           |         |         |         |         |           |
| 8  | Sumitomo Dainippon Pharma Co., Ltd. | 278,425 | 1,626,004 | 1,124,837 | 0       | 0       | 0       | 77,959  | 3,107,225 |
| 9  |                                     |         |           |           |         |         |         |         |           |
| 10 | Nippon Kayaku Co., Ltd.             | 774,021 | 679,357   | 55,685    | 800,124 | 22,274  | 0       | 122,507 | 2,453,968 |
| 11 | Astellas Pharma Inc.                | 390,000 | 100,000   | 900,000   | 100,000 | 520,000 | 0       | 0       | 2,010,000 |
| 12 |                                     |         |           |           |         |         |         |         |           |
| 13 | Asahi Kasei Pharma Corporation      | 0       | 114,552   | 1,659,413 | 0       | 111,370 | 0       | 0       | 1,885,335 |
| 14 |                                     |         |           |           |         |         |         |         |           |
| 15 | Nippon Shinyaku Co., Ltd.           | 0       | 0         | 1,748,509 | 0       | 111,370 | 0       | 0       | 1,859,879 |
| 16 | Otsuka Pharmaceutical Co., Ltd.     | 100,000 | 440,000   | 607,912   | 0       | 0       | 46286   | 200,000 | 1,394,198 |
| 17 |                                     |         |           |           |         |         |         |         |           |
| 18 | Zeria Pharmaceutical Co., Ltd.      | 0       | 1,113,700 | 0         | 0       | 0       | 0       | 222,740 | 1,336,440 |
| 19 |                                     |         |           |           |         |         |         |         |           |
| 20 | Shionogi & Co., Ltd.                | 360,920 | 329,984   | 309,360   | 103,120 | 0       | 0       | 134,056 | 1,237,440 |
| 21 | Kyorin Pharmaceutical Co.,LTD.      | 845,584 | 72,184    | 72,184    | 0       | 206,241 | 0       | 0       | 1,196,193 |
| 22 |                                     |         |           |           |         |         |         |         |           |
| 23 | Tsumura & Co.                       | 0       | 1,080,290 | 55,685    | 55,685  | 0       | 0       | 0       | 1,191,660 |
| 24 |                                     |         |           |           |         |         |         |         |           |
| 25 | Teijin Pharma Limited               | 170,000 | 70,000    | 850,000   | 0       | 0       | 0       | 0       | 1,090,000 |
| 26 | Sanwa Kagaku Kenkyusho Co., Ltd.    | 0       | 0         | 890,960   | 0       | 0       | 0       | 0       | 890,960   |
| 27 |                                     |         |           |           |         |         |         |         |           |
| 28 | AbbVie GK                           | 0       | 467,754   | 245,014   | 0       | 0       | 0       | 0       | 712,768   |
| 29 |                                     |         |           |           |         |         |         |         |           |
| 30 | Terumo Corporation                  | 110,440 | 430,716   | 0         | 0       | 0       | 0       | 110,440 | 651,596   |
| 31 | Kowa Company, Limited               | 0       | 0         | 0         | 0       | 0       | 0       | 556,851 | 556,851   |
| 32 |                                     |         |           |           |         |         |         |         |           |
| 33 | Novo Nordisk Pharma Ltd.            | 0       | 0         | 360,925   | 0       | 0       | 0       | 0       | 360,925   |
| 34 |                                     |         |           |           |         |         |         |         |           |
| 35 | Meiji Seika                         | 154,680 | 51,560    | 0         | 51,560  | 0       | 0       | 72,184  | 329,984   |
| 36 | Aska Pharmaceutical Co., Ltd.       | 0       | 111,370   | 0         | 77,959  | 111,370 | 0       | 0       | 300,699   |
| 37 |                                     |         |           |           |         |         |         |         |           |
| 38 | Nippon Chemiphar Co., Ltd.          | 0       | 167,055   | 0         | 0       | 0       | 0       | 111,370 | 278,425   |
| 39 |                                     |         |           |           |         |         |         |         |           |
| 40 |                                     |         |           |           |         |         |         |         |           |
| 41 |                                     |         |           |           |         |         |         |         |           |
| 42 |                                     |         |           |           |         |         |         |         |           |
| 43 |                                     |         |           |           |         |         |         |         |           |
| 44 |                                     |         |           |           |         |         |         |         |           |
| 45 |                                     |         |           |           |         |         |         |         |           |
| 46 |                                     |         |           |           |         |         |         |         |           |

|    |                                    |         |         |        |         |   |   |         |         |
|----|------------------------------------|---------|---------|--------|---------|---|---|---------|---------|
| 1  |                                    |         |         |        |         |   |   |         |         |
| 2  |                                    |         |         |        |         |   |   |         |         |
| 3  |                                    |         |         |        |         |   |   |         |         |
| 4  |                                    |         |         |        |         |   |   |         |         |
| 5  | Kracie Pharmaceutical, Ltd.        | 0       | 61,872  | 0      | 0       | 0 | 0 | 206,240 | 268,112 |
| 6  | Ayumi Pharmaceutical Corporation   | 154,680 | 0       | 0      | 0       | 0 | 0 | 72,184  | 226,864 |
| 7  |                                    |         |         |        |         |   |   |         |         |
| 8  | Kissei Pharmaceutical Co., Ltd.    | 111,370 | 0       | 0      | 0       | 0 | 0 | 111,370 | 222,740 |
| 9  |                                    |         |         |        |         |   |   |         |         |
| 10 | Teijin Home Healthcare Limited     | 190,000 | 0       | 0      | 0       | 0 | 0 | 0       | 190,000 |
| 11 |                                    |         |         |        |         |   |   |         |         |
| 12 | Hisamitsu Pharmaceutical Co., Inc. | 22,274  | 33,411  | 0      | 111,370 | 0 | 0 | 0       | 167,055 |
| 13 | EA Pharma Co.,Ltd.                 | 0       | 154,680 | 0      | 0       | 0 | 0 | 0       | 154,680 |
| 14 |                                    |         |         |        |         |   |   |         |         |
| 15 | Torii Pharmaceutical Co., Ltd.     | 0       | 0       | 0      | 103,120 | 0 | 0 | 0       | 103,120 |
| 16 |                                    |         |         |        |         |   |   |         |         |
| 17 | Mochida Pharmaceutical Co., Ltd.   | 0       | 55,685  | 0      | 0       | 0 | 0 | 0       | 55,685  |
| 18 |                                    |         |         |        |         |   |   |         |         |
| 19 | Nihon Pharmaceutical Co., Ltd.     | 0       | 0       | 55,685 | 0       | 0 | 0 | 0       | 55,685  |
| 20 | GlaxoSmithKline plc                | 55,685  | 0       | 0      | 0       | 0 | 0 | 0       | 55,685  |

21  
22  
23  
24  
25  
26  
27  
28  
29  
30  
31  
32  
33  
34  
35  
36  
37  
38  
39  
40  
41  
42  
43  
44  
45  
46

**STROBE 2007 (v4) Statement—Checklist of items that should be included in reports of *cross-sectional studies***

| Section/Topic                | Item # | Recommendation                                                                                                                                                                       | Reported on page # |
|------------------------------|--------|--------------------------------------------------------------------------------------------------------------------------------------------------------------------------------------|--------------------|
| <b>Title and abstract</b>    | 1      | (a) Indicate the study's design with a commonly used term in the title or the abstract                                                                                               | 1                  |
|                              |        | (b) Provide in the abstract an informative and balanced summary of what was done and what was found                                                                                  | 2-4                |
| <b>Introduction</b>          |        |                                                                                                                                                                                      |                    |
| Background/rationale         | 2      | Explain the scientific background and rationale for the investigation being reported                                                                                                 | 5-9                |
| Objectives                   | 3      | State specific objectives, including any prespecified hypotheses                                                                                                                     | 8-9                |
| <b>Methods</b>               |        |                                                                                                                                                                                      |                    |
| Study design                 | 4      | Present key elements of study design early in the paper                                                                                                                              | 9-13               |
| Setting                      | 5      | Describe the setting, locations, and relevant dates, including periods of recruitment, exposure, follow-up, and data collection                                                      | 9-11               |
| Participants                 | 6      | (a) Give the eligibility criteria, and the sources and methods of selection of participants                                                                                          | 9                  |
| Variables                    | 7      | Clearly define all outcomes, exposures, predictors, potential confounders, and effect modifiers. Give diagnostic criteria, if applicable                                             | 11-12              |
| Data sources/<br>measurement | 8*     | For each variable of interest, give sources of data and details of methods of assessment (measurement). Describe comparability of assessment methods if there is more than one group | 9-12               |
| Bias                         | 9      | Describe any efforts to address potential sources of bias                                                                                                                            | Not applicable     |
| Study size                   | 10     | Explain how the study size was arrived at                                                                                                                                            | Not applicable     |
| Quantitative variables       | 11     | Explain how quantitative variables were handled in the analyses. If applicable, describe which groupings were chosen and why                                                         | 11-12              |
| Statistical methods          | 12     | (a) Describe all statistical methods, including those used to control for confounding                                                                                                | 11-12              |
|                              |        | (b) Describe any methods used to examine subgroups and interactions                                                                                                                  | 11-12              |
|                              |        | (c) Explain how missing data were addressed                                                                                                                                          | Not applicable     |
|                              |        | (d) If applicable, describe analytical methods taking account of sampling strategy                                                                                                   | Not applicable     |
|                              |        | (e) Describe any sensitivity analyses                                                                                                                                                | 12                 |

|                          |     |                                                                                                                                                                                                              |                |
|--------------------------|-----|--------------------------------------------------------------------------------------------------------------------------------------------------------------------------------------------------------------|----------------|
| <b>Results</b>           |     |                                                                                                                                                                                                              |                |
| Participants             | 13* | (a) Report numbers of individuals at each stage of study—eg numbers potentially eligible, examined for eligibility, confirmed eligible, included in the study, completing follow-up, and analysed            | 13-14          |
|                          |     | (b) Give reasons for non-participation at each stage                                                                                                                                                         | Not applicable |
|                          |     | (c) Consider use of a flow diagram                                                                                                                                                                           | Not applicable |
| Descriptive data         | 14* | (a) Give characteristics of study participants (eg demographic, clinical, social) and information on exposures and potential confounders                                                                     | 13-14          |
|                          |     | (b) Indicate number of participants with missing data for each variable of interest                                                                                                                          | Not applicable |
| Outcome data             | 15* | Report numbers of outcome events or summary measures                                                                                                                                                         | 14-17          |
| Main results             | 16  | (a) Give unadjusted estimates and, if applicable, confounder-adjusted estimates and their precision (eg, 95% confidence interval). Make clear which confounders were adjusted for and why they were included | 15-16          |
|                          |     | (b) Report category boundaries when continuous variables were categorized                                                                                                                                    | Not applicable |
|                          |     | (c) If relevant, consider translating estimates of relative risk into absolute risk for a meaningful time period                                                                                             | Not applicable |
| Other analyses           | 17  | Report other analyses done—eg analyses of subgroups and interactions, and sensitivity analyses                                                                                                               | 16             |
| <b>Discussion</b>        |     |                                                                                                                                                                                                              |                |
| Key results              | 18  | Summarise key results with reference to study objectives                                                                                                                                                     | 17-22          |
| Limitations              | 19  | Discuss limitations of the study, taking into account sources of potential bias or imprecision. Discuss both direction and magnitude of any potential bias                                                   | 18             |
| Interpretation           | 20  | Give a cautious overall interpretation of results considering objectives, limitations, multiplicity of analyses, results from similar studies, and other relevant evidence                                   | 17-22          |
| Generalisability         | 21  | Discuss the generalisability (external validity) of the study results                                                                                                                                        | 22-23          |
| <b>Other information</b> |     |                                                                                                                                                                                                              |                |
| Funding                  | 22  | Give the source of funding and the role of the funders for the present study and, if applicable, for the original study on which the present article is based                                                | 13             |

\*Give information separately for cases and controls in case-control studies and, if applicable, for exposed and unexposed groups in cohort and cross-sectional studies.

**Note:** An Explanation and Elaboration article discusses each checklist item and gives methodological background and published examples of transparent reporting. The STROBE checklist is best used in conjunction with this article (freely available on the Web sites of PLoS Medicine at <http://www.plosmedicine.org/>, Annals of Internal Medicine at <http://www.annals.org/>, and Epidemiology at <http://www.epidem.com/>). Information on the STROBE Initiative is available at [www.strobe-statement.org](http://www.strobe-statement.org).

# BMJ Open

## Pharmaceutical payments to certified oncology specialists in Japan in 2016: a retrospective observational cross-sectional analysis

|                                 |                                                                                                                                                                                                                                                                                                                                                                                                                                                                                                                                                                                                                                 |
|---------------------------------|---------------------------------------------------------------------------------------------------------------------------------------------------------------------------------------------------------------------------------------------------------------------------------------------------------------------------------------------------------------------------------------------------------------------------------------------------------------------------------------------------------------------------------------------------------------------------------------------------------------------------------|
| Journal:                        | <i>BMJ Open</i>                                                                                                                                                                                                                                                                                                                                                                                                                                                                                                                                                                                                                 |
| Manuscript ID                   | bmjopen-2018-028805.R1                                                                                                                                                                                                                                                                                                                                                                                                                                                                                                                                                                                                          |
| Article Type:                   | Research                                                                                                                                                                                                                                                                                                                                                                                                                                                                                                                                                                                                                        |
| Date Submitted by the Author:   | 10-Apr-2019                                                                                                                                                                                                                                                                                                                                                                                                                                                                                                                                                                                                                     |
| Complete List of Authors:       | Ozaki, Akihiko; Medical Governance Research Institute; Jyoban Hospital of Tokiwa Foundation, Department of Breast Surgery<br>Saito, Hiroaki; Sendai Kousei Hospital, Department of Gastroenterology<br>Onoue, Yosuke; College of Humanities and Sciences, Nihon University<br>Sawano, Toyoaki; Minamisoma Municipal General Hospital, Department of Surgery<br>Shimada, Yuki; Minamisoma Municipal General Hospital, Department of Neurosurgery<br>Somekawa, Yurie; Medical Governance Research Institute<br>Tsuji, Aritsune; Medical Governance Research Institute<br>Tanimoto, Tetsuya; Medical Governance Research Institute |
| <b>Primary Subject Heading</b>: | Ethics                                                                                                                                                                                                                                                                                                                                                                                                                                                                                                                                                                                                                          |
| Secondary Subject Heading:      | Oncology, Ethics, Health policy                                                                                                                                                                                                                                                                                                                                                                                                                                                                                                                                                                                                 |
| Keywords:                       | conflicts of interest, oncology specialist, Japan, industry payment, Japanese Society of Medical Oncology                                                                                                                                                                                                                                                                                                                                                                                                                                                                                                                       |
|                                 |                                                                                                                                                                                                                                                                                                                                                                                                                                                                                                                                                                                                                                 |

SCHOLARONE™  
Manuscripts

1  
2  
3  
4  
5  
6  
7 **BMJ Open, Research article**  
8

9 **Title:**  
10

11  
12 **Pharmaceutical payments to certified oncology specialists in Japan in 2016: a**  
13  
14  
15 **retrospective observational cross-sectional analysis**  
16  
17

18  
19  
20  
21 **Authors:**  
22

23  
24 Akihiko Ozaki, MD<sup>1,2</sup>, Hiroaki Saito, MD<sup>3</sup>, Yosuke Onoue, PhD<sup>4</sup>, Toyoaki Sawano,  
25  
26  
27 MD<sup>5</sup>, Yuki Shimada<sup>6</sup>, MD, Yurie Somekawa<sup>1</sup>, MD, Aritsune Tsuji<sup>1</sup>, Tetsuya Tanimoto,  
28  
29  
30 MD<sup>1</sup>  
31  
32

33  
34  
35  
36 **Affiliations:**  
37

38  
39 <sup>1</sup> Medical Governance Research Institute, Minato-ku, Tokyo, Japan  
40  
41

42 <sup>2</sup> Department of Breast Surgery, Jyoban Hospital of Tokiwa Foundation, Jyoban-  
43

44  
45 Kamiyunaga-Yamachi, Iwaki, Japan  
46  
47

48 <sup>3</sup> Department of Gastroenterology, Sendai Kousei Hospital, Sendai, Miyagi, Japan  
49

50  
51 <sup>4</sup> Department of Information Science, College of Humanities and Sciences, Nihon  
52

53  
54 University, Setagaya-ku, Tokyo, Japan  
55  
56  
57  
58  
59  
60



1  
2  
3  
4  
5  
6 18 <sup>5</sup> Department of Surgery, Minamisoma Municipal General Hospital, Minamisoma,

7  
8  
9 19 Fukushima, Japan

10  
11  
12 20 <sup>6</sup> Department of Neurosurgery, Minamisoma Municipal General Hospital, Minamisoma,

13  
14  
15 21 Fukushima, Japan

16  
17  
18 22

19  
20  
21 23 **Corresponding author:**

22  
23  
24 24 Akihiko Ozaki, MD, Medical Governance Research Institute, Minato-ku, Tokyo,

25  
26  
27 25 1080074 Japan.

28  
29  
30 26 Telephone: 81-3-6455-7401

31  
32  
33 27 FAX: 81-3-3441-7505

34  
35  
36 28 Email address: ozakiakihiko@gmail.com.

37  
38  
39 29

40  
41  
42 30 **Abstract (299 words)**

43  
44  
45 31 Objective: This study aimed to elucidate the characteristics of payments from

46  
47  
48 32 pharmaceutical companies to oncology specialists in Japan, whether the payment was

49  
50  
51 33 made for promotional purposes, and whether there are specific rules to cover Conflict of

52  
53  
54 34 Interest (COI) matters among the oncology specialists.

55  
56  
57 35

1  
2  
3  
4  
5  
6 36 Design, Setting, and Participants: The participants were oncology specialists certified  
7  
8  
9 37 by the Japanese Society of Medical Oncology (JSMO) up to 2016. We retrospectively  
10  
11  
12 38 extracted 2016 payment data reported by 78 Japanese pharmaceutical companies.  
13  
14  
15 39  
16  
17  
18 40 Outcome measures: We identified payments to the individual specialists, employed  
19  
20  
21 41 several regression approaches to estimate factors associated with higher value  
22  
23  
24 42 payments, made a Sankey diagram to illustrate the payment flow from the companies to  
25  
26  
27 43 oncology specialties, analyzed oncology drugs with annual sales of ¥5 billion [£33.9  
28  
29  
30 44 million, €40.2 million, \$46.0 million] or above (hereafter high-income drugs) and  
31  
32  
33 45 examined the JSMO policy for oncology specialists disclosing COIs.  
34  
35  
36 46  
37  
38  
39 47 Results: In total, 59 companies made at least one payment to the oncologists, and the  
40  
41  
42 48 total monetary value was ¥585,453,314 [£3,963,800, €4,702,436, \$5,381,005]. Of the  
43  
44  
45 49 1080 specialists sampled, 763 (70.6%) received at least one payment while 317 received  
46  
47  
48 50 no payment at all. Of the 763, a small group of 142 (13.1%) receiving at least ¥1 million  
49  
50  
51 51 [£6.8 thousand, €8.0 thousand, \$9.2 thousand] accounted for 71.5% of the total  
52  
53  
54 52 (¥418,345,258 [£2,832,398, €3,360,203, \$3,845,085]). After adjustment of covariates,  
55  
56  
57 53 working for university hospitals and for cancer hospitals were key factors associated  
58  
59  
60

1  
2  
3  
4  
5  
6 54 with larger monetary payments. Payments were likely to be made toward the specialties  
7  
8  
9 55 using high-income drugs, though the tendency differed between companies. The JSMO  
10  
11  
12 56 has its own COI policy for its members but it did not specifically mention its certified  
13  
14  
15 57 oncology specialists.  
16  
17

18 58

19  
20  
21 59 Conclusion: Substantial financial relationships were observed between pharmaceutical  
22  
23  
24 60 companies and oncology specialists, but their extents varied significantly between  
25  
26  
27 61 individuals. There should be specific COI rules covering oncologists.  
28  
29

30 62

31  
32  
33 63 **Keywords:** conflict of interest; oncology specialist; Japan; industry payment; Japanese  
34  
35  
36 64 Society of Medical Oncology  
37  
38

39 65

40  
41  
42 66 **Article summary (Strengths and limitations of this study):**  
43  
44

45 67 ✓ We considered oncology specialists certified by the Japan Society of Medical  
46  
47  
48 68 Oncology, which is one of the largest professional medical associations in the  
49  
50  
51 69 clinical oncology field of Japan.  
52  
53  
54  
55  
56  
57  
58  
59  
60

- 1  
2  
3  
4  
5  
6 70 ✓ The authors independently organized payment data for oratory, writing, and  
7  
8  
9 71 consulting work, as published by the major pharmaceutical companies, and created  
10  
11  
12 72 a single uniform payment database.  
13  
14  
15 73 ✓ Accuracy of the affiliations and subspecialties of some oncology specialist in the  
16  
17  
18 74 study year (2016) were estimated using the data on the affiliation websites and  
19  
20  
21 75 other data sources on the Internet, possibly causing some measurement errors in  
22  
23  
24 76 these variables.  
25  
26  
27 77 ✓ This study only covered limited types of payment data in the single year (2016),  
28  
29  
30 78 which hampered a comprehensive and/or longitudinal analysis of the type and value  
31  
32  
33 79 of the payment among the oncology specialists.  
34  
35

36 80

37 81

38 82 **Word count: 4,255**

39 83

40 84 **Introduction**

41  
42  
43  
44  
45  
46  
47  
48  
49 85 Cancer has been the leading cause of mortality in Japan since 1981. The government  
50  
51  
52 86 introduced its first Comprehensive 10-year Strategy for Cancer Control (1984-1993),  
53  
54  
55 87 followed by a New 10-year Strategy to Overcome Cancer (1994-2003) and a third  
56  
57  
58  
59  
60

1  
2  
3  
4  
5  
6  
7 88 Comprehensive 10-year Strategy for Cancer Control in 2014, aimed at boosting cancer  
8  
9  
10 89 research and provide high-quality cancer interventions and services. In 2015, an  
11  
12 90 “Acceleration Plan for Cancer Control” was proposed with three key foci, “prevention”,  
13  
14  
15 91 “treatment/research” and “coexistence with cancer”, with a Basic Plan to Promote  
16  
17  
18 92 Cancer Control Programs being approved in 2017. In 2016, the year our study covered,  
19  
20  
21 93 there were 372,986 cancer deaths in Japan, with malignant neoplasms costing the nation  
22  
23  
24 94 an estimated ¥3.6 trillion [£24.4 billion, €28.9 billion, \$33.1 billion] in medical  
25  
26  
27 95 expenditure. In males, lung cancer was the leading cause of cancerous deaths (52,430)  
28  
29  
30 96 in 2016, followed by gastric cancer (29,854) and colorectal cancer (27,026), while  
31  
32  
33 97 colorectal cancer was the leading cause of cancerous death in females (23,073),  
34  
35  
36 98 followed by lung cancer (21,408) and colorectal cancer (17,405), in the same year.<sup>1</sup>  
37  
38  
39 99 The risk factors for cancer are diverse, including tobacco use, infection, obesity,  
40  
41  
42 100 radiation exposure, reproductive and hormonal factors, and other environmental and  
43  
44  
45 101 occupational pollutants and carcinogens.<sup>2</sup> In case of Japan, primarily with the  
46  
47  
48 102 population ageing, its cancer death is estimated to continuously increase in future.<sup>1</sup>  
49  
50  
51 103  
52  
53  
54 104 For the pharmaceutical industry, medical and therapeutic practice generates substantial  
55  
56  
57 105 income, allowing it to satisfy market demand and exploit various opportunities to  
58  
59  
60

1  
2  
3  
4  
5  
6 106 expand their own profits.<sup>3-5</sup> From the 1950s, the main business model of the  
7  
8  
9 107 pharmaceutical industry was the production of low-price drugs to treat diseases and  
10  
11  
12 108 conditions that were primarily chronic and prevalent (e.g. hypertension and diabetes).<sup>6-8</sup>  
13  
14  
15 109 Following advances of drug development against infectious and chronic diseases,  
16  
17  
18 110 cancer became an ever-increasing and major problem, with 17.2 million incidents and  
19  
20  
21 111 213.2 million cancer-associated disability-adjusted life-years (DALY) lost during 1990-  
22  
23  
24 112 2016 worldwide.<sup>9</sup> The pharmaceutical industry therefore adopted a new business model,  
25  
26  
27 113 discovery and development of anticancer agents that could be sold at extremely high  
28  
29  
30 114 price, but usually for short treatment durations.<sup>3-5</sup> This guaranteed a hefty profit in a  
31  
32  
33 115 short timeframe - provided that the drugs would be prescribed and used - while  
34  
35  
36 116 imposing an extraordinarily high cost on patients and health systems.<sup>3-5 10</sup> Indeed, a  
37  
38  
39 117 single administration of tisagenlecleucel, a recently-approved chimeric antigen receptor  
40  
41  
42 118 T-cell immunotherapy manufactured by Novartis Pharma, reportedly costs \$475,000.<sup>11</sup>  
43  
44  
45 119  
46  
47  
48 120 Physicians remain paramount decision-makers on the demand-side of the  
49  
50  
51 121 pharmaceutical market. Even subtle financial interactions between physicians and a  
52  
53  
54 122 pharmaceutical company are known to affect their prescribing behavior,<sup>12-17</sup> and could  
55  
56  
57 123 encourage irrational or preferential use of a company's drug. Unsurprisingly, given the  
58  
59  
60

1  
2  
3  
4  
5  
6 124 cost of anticancer drugs, oncologists have latterly become primary targets for  
7  
8  
9 125 approaches from companies with high-cost anticancer products to sell. Indeed,  
10  
11  
12 126 significant financial relationships between such companies and the authors of the  
13  
14  
15 127 Clinical Practice Guidelines (CPGs) issued by the National Comprehensive Cancer  
16  
17  
18 128 Networks (NCCN) in the United States have been reported.<sup>18</sup> Given these far from ideal  
19  
20  
21 129 circumstances, there has been a growing need for intervention, in the form of policy  
22  
23  
24 130 implementation and education about the implications of these interactions to help  
25  
26  
27 131 protect doctors, patients, institutions and the companies themselves.<sup>14-17</sup> Consequently,  
28  
29  
30 132 medical and governmental facilities worldwide are considering guidelines, self-  
31  
32  
33 133 regulation and legislative checks to help control the relationship between physicians and  
34  
35  
36 134 the pharmaceutical industry, exemplified by the USA's Physician Payments Sunshine  
37  
38  
39 135 Act, enacted in 2010.<sup>19 20</sup>  
40  
41  
42 136  
43  
44  
45 137 Although Japan has the world's third largest pharmaceutical market, with annual sales  
46  
47  
48 138 of \$76 billion in 2017,<sup>21</sup> its overall scale has been declining at approximately 2%  
49  
50  
51 139 annually.<sup>22</sup> To maintain sales in these competitive and tightening markets, forceful  
52  
53  
54 140 advertisement of high-price products, namely novel oncology drugs, has become  
55  
56  
57 141 increasingly important for pharmaceutical companies. Indeed, sales of oncology drugs  
58  
59  
60

1  
2  
3  
4  
5  
6 142 have recently been rising in Japan, exceeding ¥1 trillion [£6.8 billion, €8.0 billion, \$9.2  
7  
8  
9 143 billion] for the first time in 2016.<sup>23</sup> Furthermore, sales are predicted to increase 1.5–fold  
10  
11  
12 144 in the next decade with the increasing application of immunotherapy in clinical  
13  
14  
15 145 practice.<sup>23</sup> It would be reasonable to assume that pharmaceutical companies will  
16  
17  
18 146 increasingly deploy marketing measures and incentives targeting oncology specialists  
19  
20  
21 147 for the immediate and foreseeable future.  
22

23  
24  
25 148

26  
27 149 In Japan, the Japan Pharmaceutical Manufacturers Association (JPMA) covers a  
28  
29  
30 150 majority of companies that manufacture brand name drugs in Japan. Its members  
31  
32  
33 151 accounted for 80.8% of total pharmaceutical sales in Japan in 2015.<sup>24</sup> In 2011, the  
34  
35  
36 152 JPMA published transparency guidelines requiring all member companies to disclose all  
37  
38  
39 153 payments for speaking, writing and consulting made to all individuals, specifying their  
40  
41  
42 154 names and affiliations.<sup>25</sup> The aim was to improve the transparency of linkages between  
43  
44  
45 155 pharmaceutical companies and physicians, as in the Open Payments Database in the  
46  
47  
48 156 United States.<sup>19 20</sup> However, the disclosure format, whereby companies involved  
49  
50  
51 157 published the required data on their own individual websites, has differed among and  
52  
53  
54 158 between companies and the aggregated, standardized payment data have not been  
55  
56  
57  
58  
59  
60



1  
2  
3  
4  
5  
6 159 readily available.<sup>26</sup> As a result, an examination of company/physicians links and  
7  
8  
9 160 payments in a meaningful way has proved almost impossible.  
10  
11  
12  
13 161  
14

15 162 The aims of the current study were: 1) to understand and evaluate the characteristics and  
16  
17  
18 163 distributions of financial payments made by pharmaceutical companies to oncology  
19  
20  
21 164 specialists: 2) to examine a well-accepted belief that pharmaceutical companies make  
22  
23  
24 165 payments to promote their products; and 3) to elucidate what Japanese oncology  
25  
26  
27 166 specialists are obliged to disclose with respect to any conflicts of interest.  
28  
29

30 167

## 31 32 33 168 **Methods**

### 34 35 36 169 *Study setting and participants*

37  
38  
39 170 The Japan Society of Medical Oncology (JSMO), with over 9154 general members, is  
40  
41  
42 171 the one of the largest professional medical societies in the clinical oncology field in  
43  
44  
45 172 Japan. The JSMO began operating a specialty registration system for members in 2004.  
46  
47  
48 173 This required JSMO members wishing to be certified to meet specific requirements for  
49  
50  
51 174 both oncology care and academic achievement. Only after passing the requisite  
52  
53  
54 175 examination, could they become board-certified oncology specialists with renewed  
55  
56  
57  
58  
59  
60

1  
2  
3  
4  
5  
6 176 certification of every 5 years. We included all oncology specialists certified by the

7  
8  
9 177 JSMO as of April 1st, 2016.

10  
11  
12 178

13  
14  
15 179 *Sources of Payment Data*

16  
17  
18 180 The sources of the payment data were the websites of the 78 pharmaceutical companies

19  
20  
21 181 involved in this study. These companies publish data of payments made to physicians

22  
23  
24 182 and other researchers annually under the transparency guidelines of the JPMA. They

25  
26  
27 183 were categorized into 71 active JPMA members, six affiliated entities of these

28  
29  
30 184 companies, and one past member. The companies included in this study, plus the

31  
32  
33 185 starting and ending dates of their payment data, are listed in Supplementary Material 1.

34  
35  
36 186

37  
38  
39 187 We obtained each company's data and organized them into a unified single database.

40  
41  
42 188 This was done because no data was published as a spreadsheet, so data with character

43  
44  
45 189 codes were converted into a spreadsheet format and data with no character codes were

46  
47  
48 190 converted into text files using an Optical Character Reader. Moreover, where data was

49  
50  
51 191 protected against facsimile or reproduction, we used FullShot10 software (Inbit, CA,

52  
53  
54 192 USA) to scan photos of the data and converted the data into text files. The accuracy of

55  
56  
57 193 the re-organized data was confirmed by comparing it with the original data. The

1  
2  
3  
4  
5  
6 194 database included physicians' names, their main institutional affiliation, payments  
7  
8  
9 195 received, the form of the payments, and the total amount paid. The form of payment  
10  
11  
12 196 was categorized into three types; payment for speaking engagements, payment for  
13  
14  
15 197 writing or publication work, and consulting fees. For the purposes of this study, we  
16  
17  
18 198 converted Japanese yen (¥) to Pound Sterling (£), Euro (€), and US dollars (\$), using the  
19  
20  
21 199 average monthly exchange rate for 2016, namely ¥147.7 per £1, ¥124.5 per €1 and  
22  
23  
24 200 ¥108.8 per US\$1.  
25  
26

27 201

30 202 *Data collection*

33 203 We examined payment data for all oncology specialists included in this study. We  
34  
35  
36 204 extracted their working institutions and regional locations, along with the year of their  
37  
38  
39 205 certification by the JSMO. We further confirmed the accuracy of such information in  
40  
41  
42 206 the year 2016, collating data from institutional websites and other sources. We  
43  
44  
45 207 speculated the cancer specialties (respirology, gastroenterology, hematology, breast,  
46  
47  
48 208 etc.) of all oncologists who received total payment of ¥1 million [£6.8 thousand, €8.0  
49  
50  
51 209 thousand, \$9.2 thousand] or above from the included pharmaceutical companies, using  
52  
53  
54 210 data from institutional websites and other sources as well. In general, ¥1 million is  
55  
56  
57 211 approximately 25% of the median annual income of a Japanese citizen.<sup>27</sup> In addition, we  
58  
59  
60

1  
2  
3  
4  
5  
6 212 sought to examine any prevailing COI policy from the JSMO website that could apply

7  
8  
9 213 to oncologists.

10  
11  
12 214

13  
14  
15 215 *Data analysis*

16  
17  
18 216 To examine the characteristics and distributions of payments, we performed descriptive

19  
20  
21 217 analyses of the data on an individual oncology specialist and pharmaceutical company

22  
23  
24 218 basis. We then summarized the characteristics of oncology specialists according to the

25  
26  
27 219 total monetary value of the payment they received, dividing the patients into the three

28  
29  
30 220 groups; ¥1 million or above (High-payment Group); ¥1 – 1 million (Low-payment

31  
32  
33 221 Group), and ¥0 (No-payment Group).

34  
35  
36  
37 222

38  
39  
40 223 Using a multivariate negative binomial regression model, we subsequently examined

41  
42  
43 224 possible factors associated with the monetary value of the payment to the individual

44  
45  
46 225 oncologists, using institutional place of work, regional working locations, and year of

47  
48  
49 226 experience after board certification as covariates. The payment data was rounded off as

50  
51  
52 227 a unit of ¥1 million. Further, to assess the effects of the cancer specialty on the value of

53  
54  
55 228 the payment, using a zero-truncated negative binomial model, we repeated the analysis

56  
57  
58 229 in High-payment Group. In addition, for Low-payment and No-payment Groups we

1  
2  
3  
4  
5  
6 230 examined possible factors associated with the monetary value of the payment to the  
7  
8  
9 231 individual oncologists, using the same model adopted as for the overall population. For  
10  
11  
12 232 this analysis, the payment data was rounded off as a unit of ¥100,000 [£677, €803,  
13  
14  
15 233 \$919]. Second, we created a Sankey diagram among the specialists in this cohort to  
16  
17  
18 234 illustrate the distribution of the payment to each specialty on an individual company  
19  
20  
21 235 basis. The Sankey diagram is a flow diagram, where band width proportionally  
22  
23  
24 236 represents the flow quantity.<sup>28</sup> Payment values from individual companies, according to  
25  
26  
27 237 cancer specialty, are depicted in the bands in the diagram, width being proportional to  
28  
29  
30 238 the total amount of the payment. In addition, to see whether the payment was linked to  
31  
32  
33 239 any specific oncology drugs, we examined such drugs with annual Japanese domestic  
34  
35  
36 240 sales of ¥5 billion [£33.9 million, €40.2 million, \$46.0 million] or above in the fiscal  
37  
38  
39 241 year of 2016, and if each drug was covered under the Japanese National Health  
40  
41  
42 242 Insurance scheme in specific oncology subspecialty by the end of the same year (March  
43  
44  
45 243 31, 2017). We further examined newly-approved drugs and drugs with an added  
46  
47  
48 244 indication during the fiscal years of 2015 and 2016 (April 1, 2015 to March 31, 2017).

51  
52 245

53  
54  
55 246 *Human subject involvement*  
56  
57  
58  
59  
60

1  
2  
3  
4  
5  
6 247 The present study is a retrospective analysis of existing databases and public domain  
7  
8  
9 248 information. No patients or any other individuals were other than unnamed oncology  
10  
11  
12 249 specialists were included in the study.  
13  
14

15 250

## 18 251 **Results**

21 252 The JSMO had over 9000 members at the time the study was undertaken, with 1081  
22  
23  
24 253 physicians having been board certified as oncology specialists. We excluded one  
25  
26  
27 254 oncologist whose professional affiliation we were unable to confirm, and he did not  
28  
29  
30 255 receive any payment from the pharmaceutical companies. Thus, we included a total of  
31  
32  
33 256 1,080 specialist oncologists in our analyses.  
34  
35

36 257

39 258 Table 1 summarizes the details of certified oncologists and payments from Japanese  
40  
41  
42 259 pharmaceutical firms. Of the 1080 selected certified oncology specialists, 442 (40.9%),  
43  
44  
45 260 183 (16.9%), and 455 (42.1%) worked for university hospitals, cancer hospitals, and  
46  
47  
48 261 other institutions, respectively. The number of specialists certified by the JSMO from  
49  
50  
51 262 2004 onwards was largest in 2013 (143 [13.2%]), the number of new certifications  
52  
53  
54 263 displaying a downward trend during the subsequent years (2014 [98, 9.1%], 2015 [85,  
55  
56  
57 264 7.9%], and 2016 [76, 7.0%]).  
58  
59  
60

1  
2  
3  
4  
5  
6  
7  
8  
9  
10  
11  
12  
13  
14  
15  
16  
17  
18  
19  
20  
21  
22  
23  
24  
25  
26  
27  
28  
29  
30  
31  
32  
33  
34  
35  
36  
37  
38  
39  
40  
41  
42  
43  
44  
45  
46  
47  
48  
49  
50  
51  
52  
53  
54  
55  
56  
57  
58  
59  
60

265

266 A total of 7325 payments were recorded, the total monetary value being ¥585,453,314

267 [£3,963,800, €4,702,436, \$5,381,005]. Of this total, ¥467,802,690 [£3,167,249,

268 €3,757,451, \$4,299,657] was for speaking engagements, ¥94,682,807 [£641,048,

269 €760,504, \$870,246] was for consulting services, and ¥22,266,186 [£150,753,

270 €178,845, \$204,652] was paid for writing work. The median monetary value and count

271 of an individual payment was ¥120,016 [£813, €964, \$1,103]. (interquartile range (IQR)

272 ¥0 – ¥449,378 [£3,043, € 3,609, \$4,130] and 2 (IQR 0–7), respectively.

273

274 Of the 1080 individuals, 763 (70.6%) received at least one payment. Furthermore, 142

275 (13.1%) received payments totaling  $\geq$ ¥1 million, while 19 (1.8%) received  $\geq$ ¥5 million

276 [£33.9 thousand, €40.2 thousand, \$46.0 thousand]. Two individuals (0.2%) received

277  $\geq$ ¥10 million [£67.7 thousand, €80.3 thousand, \$91.9 thousand].

278

279 Table 2 summarizes the monetary values and counts of payments made by the 78

280 pharmaceutical companies. In total, 59 (75.6%) companies made at least one payment to

281 oncology specialists. The Chugai Pharmaceutical Co. Ltd., a subsidiary of F. Hoffmann-

282 La Roche Ltd, made the largest accumulated payment of ¥103,830,493 [£702,982, €

1  
2  
3  
4  
5  
6 283 833,980, \$954,324]. The median monetary value and count among the 78 companies  
7  
8  
9 284 was ¥645,947 [£4,373, €5,188, \$5,937] (IQR ¥33,410 [£226, €268, \$307] – ¥5,196,201  
10  
11  
12 285 [£35,181, €41,737, \$47,759] and 10 (IQR 1 – 71), respectively.  
13  
14  
15 286  
16  
17  
18 287 Table 3 ranks the oncology specialists according to the monetary value of the payments  
19  
20  
21 288 they received. In High-payment Group, 52.8% (75) of the oncologists worked for  
22  
23  
24 289 university hospitals, while 28.2% (40) worked for cancer hospitals: these figures were  
25  
26  
27 290 larger than those seen in the other two groups. Further, while only 19.7% (28) of the  
28  
29  
30 291 specialists in High-payment Group were certified during the previous five years (2012  
31  
32  
33 292 to 2016), 49.4% (307) and 60.3% (191) of Low-payment and No-payment Groups  
34  
35  
36 293 respectively were certified during these five years. The top three cancer specialties  
37  
38  
39 294 attracting payments were respirology (53 [37.3%]), gastroenterology (32 [22.5%]), and  
40  
41  
42 295 hematology (29 [20.4%]).  
43  
44  
45 296  
46  
47  
48 297 In Group A, the total monetary value paid and number of payments were ¥418,345,258  
49  
50  
51 298 [£2,832,398, €3,360,203, \$3,845,085] and 4466, respectively, accounting for 71.5% and  
52  
53  
54 299 61.0% of the totals, with the largest three specialties of respirology (¥166,220,775  
55  
56  
57 300 [£1,125,395, €1,335,107, \$1,527,764], 39.7%), gastroenterology (¥91,319,282  
58  
59  
60



1  
2  
3  
4  
5  
6 301 [£618,275.00, €733,488, \$839,332], 21.8%) and hematology (¥84,186,048 [£569,980,  
7  
8  
9 302 €676,193, \$773,769], 20.1%).

10  
11  
12 303

13  
14  
15 304 Table 4 displays findings of the multivariate regression analyses for the monetary value  
16  
17  
18 305 of payments. Oncologists with longer experience after board certification were  
19  
20  
21 306 significantly more likely to receive larger payments compared with those with shorter  
22  
23  
24 307 experience after certification (relative monetary value (RMV)=1.32, 95% CI=1.26 –  
25  
26  
27 308 1.39). Those working for university hospitals (RMV=2.98, 95% CI=2.11 – 4.21) and  
28  
29  
30 309 those working for cancer hospitals (RMV=3.19, 95% CI=2.14 – 4.76) also tended to  
31  
32  
33 310 receive higher payments compared with those working for other types of institutions.

34  
35  
36 311 The trends observed in Group A were not reflected in Groups B and C: in these groups,  
37  
38  
39 312 there were no significant differences in the monetary value of the payment depending  
40  
41  
42 313 on the type of affiliation. Those working in respirology were likely to receive higher  
43  
44  
45 314 payments compared with all others, although this trend was not statistically significant.

46  
47  
48 315

49  
50  
51 316 Figure 1 displays payment distributions to each cancer specialty on an individual  
52  
53  
54 317 company basis. Details of the payments are provided in Supplementary Material 2.

55  
56  
57 318 Further, in Supplementary Material 3, we summarize the list of oncology drugs with  
58  
59  
60

1  
2  
3  
4  
5  
6 319 Japanese domestic sales of ¥5 billion or more. Chugai Pharmaceutical Co., Ltd. made  
7  
8  
9 320 the largest specialty payment of ¥74,376,669 [£503,566, €597,403, \$683,609] and the  
10  
11  
12 321 top four specialties were respiratory (¥24,545,685 [£166,186, €197,154, \$225,604],  
13  
14  
15 322 33.0%), gastroenterology (¥23,656,984 [£160,169, €190,016, \$217,436], 31.8%),  
16  
17  
18 323 hematology (¥14,432,072 [£97,712, €115,920, \$132,648], 19.4%), and breast cancer  
19  
20  
21 324 (¥8,958,305 [£60,652, €71,954, \$82,337], 12.0%). The Chugai company manufactured  
22  
23  
24 325 eight oncology drugs with annual sales of ¥5 billion or more (Supplementary Material  
25  
26  
27 326 3), and three, three, one, and five drugs were respectively covered under the National  
28  
29  
30 327 Health Insurance scheme for the field of respiratory, gastroenterology, hematology and  
31  
32  
33 328 breast. Nivolumab, manufactured by the Ono Pharmaceutical Co., Ltd., mainly used in  
34  
35  
36 329 lung cancer and melanoma, had the largest domestic sales in 2016 (¥103.9 billion  
37  
38  
39 330 [£703.5 million, €834.5 million, \$955.0 million]). The total monetary value of the  
40  
41  
42 331 company's payments was ¥35,035,323 [£237,206, € 281,408, \$322,016], (representing  
43  
44  
45 332 fourth place in the payment table), of which ¥22,619,251 [£153,143, €181,681,  
46  
47  
48 333 \$207,898], (64.6%) was specifically distributed for respiratory work. All of the top  
49  
50  
51 334 eight companies with regard to the monetary value of the payments (Supplementary  
52  
53  
54 335 Material 2) had at least one drug which was newly approved that with an added  
55  
56  
57 336 indication under the National Health Insurance scheme in the fiscal years of 2015 and  
58  
59  
60

1  
2  
3  
4  
5  
6 337 2016. While AstraZeneca plc had no oncology drugs with Japanese domestic sales of at  
7  
8  
9 338 least ¥5 billion (Supplementary Material 3), vandetanib and osimertinib was newly  
10  
11  
12 339 approved for thyroid cancer in September 28, 2015 and non-small cell lung cancer in  
13  
14  
15 340 March 28, 2016, respectively (Supplementary Material 4). The total monetary value of  
16  
17  
18 341 the company's payments was second, accounting for ¥42,544,963 [£288,050, €341,727,  
19  
20  
21 342 \$391,038]. Of the total, 86.0% (¥36,577,758 [£247,649, €293,797, \$336,193]) was  
22  
23  
24 343 specifically distributed for respirology work.  
25  
26

27 344  
28  
29  
30 345 The JSMO has guideline on the COI disclosure for its members. Its members are  
31  
32  
33 346 required to disclose their COIs associated with publications and other research  
34  
35  
36 347 presentations. Further, executive board members, auditors, and other high-class  
37  
38  
39 348 members, as well as presidents and vice-presidents of conferences and committee  
40  
41  
42 349 members under the JSMO are required to disclose their COIs associated with their  
43  
44  
45 350 works and positions. These include, with respect to any for-profit organization,  
46  
47  
48 351 reporting any 1) Position as an officer or advisor, 2) Stock ownership, 3) Patent  
49  
50  
51 352 royalties or licensing fees, 4) Honoraria (e.g. lecture fees), 5) Fees paid for any writing  
52  
53  
54 353 or publication work, 6) Receipt of research funding, 7) Advisory fees or financial  
55  
56  
57 354 remuneration in exchange for testimony, 8) Acceptance of researchers from any for-  
58  
59  
60

1  
2  
3  
4  
5  
6 355 profit enterprise, 9) Endowed chairs offered, and 10) Remuneration (travel, gifts, or  
7  
8  
9 356 other in-kind payments not directly related to research). However, there are no specific  
10  
11  
12 357 rules specifically referring to oncology specialists.  
13  
14

15 358

## 18 359 **Discussion**

20  
21 360 In 2016, approximately ¥600 million [£4.1 million, €4.8 million, \$5.5 million] was paid  
22  
23  
24 361 by Japanese pharmaceutical companies to 763 (70.6%) certified oncology specialists.  
25

26  
27 362 Payments appeared to be concentrated on specific targets, notably experienced  
28

29  
30 363 oncologists working for university hospitals and cancer hospitals.  
31  
32

33 364

34  
35  
36 365 The proportion of oncologists receiving payments was larger compared with general  
37

38  
39 366 physicians in the US (48.0%)<sup>29</sup> and Japan (33.3%).<sup>30</sup> However, the proportion was  
40

41  
42 367 slightly smaller than that of NCCN oncology CPG authors in the US (86.4%).<sup>18</sup>  
43  
44

45 368 Although the mean value of payments in our study was approximately half of that of the  
46

47  
48 369 CPG authors (\$4,888 [data not shown] vs.\$10,011), a simple comparison is not valid, as  
49

50  
51 370 our analysis did not include payments related to meals, transportation and  
52

53  
54 371 accommodation, stock ownership, investment interest, or payments from medical device  
55

56  
57 372 companies.<sup>29</sup> The CPG authors strongly influence oncology practice, both in the US and  
58  
59  
60

1  
2  
3  
4  
5  
6 373 internationally,<sup>31</sup> by recommending treatment algorithms. They thus become prime  
7  
8  
9 374 targets for pharmaceutical companies selling anticancer products. It is reasonable to  
10  
11  
12 375 assume that Japanese pharmaceutical companies with similar anticancer interests would  
13  
14  
15 376 target oncology specialists in an attempt to boost the sales and use of their specific  
16  
17  
18 377 products.

19  
20  
21 378

22  
23  
24 379 We observed a large disparity in payments to specialists. Those receiving ¥1 million or  
25  
26  
27 380 more accounted for 13.1% of all oncologists studied but received 71.5% of the total  
28  
29  
30 381 paid. Oncologists working for university hospitals and those working for cancer  
31  
32  
33 382 hospitals similarly received large value payments. In Japan, cancer centers are generally  
34  
35  
36 383 more likely to treat more cancer patients compared to university hospitals. Indeed,  
37  
38  
39 384 cancer centers top the nationwide ratings for treatments of most of the common cancers,  
40  
41  
42 385 including lung, colon, gastric, and breast cancer.<sup>32</sup> In contrast, university hospitals are  
43  
44  
45 386 regarded as symbols of academic excellence and authority, and medical school  
46  
47  
48 387 professors traditionally have a strong influence on both physicians and medical practice  
49  
50  
51 388 in their field of expertise. They are more influential in setting treatment protocols which  
52  
53  
54 389 are usually followed without question by less senior medical staff nationwide. Thus, our  
55  
56  
57 390 findings suggest that Japanese pharmaceutical companies have placed emphasis on  
58  
59  
60

1  
2  
3  
4  
5  
6 391 expertise and authority, as well as clinical experience, in the selection of targets for their  
7  
8  
9 392 promotional activities.  
10

11  
12 393

13  
14  
15 394 We found that respirology attracted the greatest financial outlay. In Japan, lung cancer  
16  
17  
18 395 is of primary concern at present, covering a large patient volume and consequently  
19  
20  
21 396 attracting multiple novel oncology drugs, such as alectinib (Chugai Pharmaceutical Co.,  
22  
23  
24 397 Ltd., [2014]), nivolumab (Ono Pharmaceutical Co., Ltd, [approved 2015]), afatinib  
25  
26  
27 398 (Nippon Boehringer Ingelheim Co., Ltd., [2016]), certinib (Novartis Pharma K.K.,  
28  
29  
30 399 [2016]), osimertinib (AstraZeneca plc, [2016]), pembrolizumab (MSD K.K., [2016]),  
31  
32  
33 400 ramcirumab (Eli Lilly Japan K.K., [2016]), all for non-small cell lung cancer  
34  
35  
36 401 (Supplementary Materials 3 & 4). As such, for the pharmaceutical companies, this field  
37  
38  
39 402 is a critical yet highly competitive target in any strategy to maximize the cost-  
40  
41  
42 403 effectiveness of their promotional endeavors.  
43  
44

45 404

46  
47  
48 405 The examples of Chugai Pharmaceutical and Ono Pharmaceutical chiefly support the  
49  
50  
51 406 belief that there is an association between the value and destination of payments  
52  
53  
54 407 dependent on the products the companies in question manufacture. In contrast, the  
55  
56  
57 408 example of AstraZeneca confirms the idea that that funds were mainly allocated to  
58  
59  
60

1  
2  
3  
4  
5  
6 409 promote their novel product: osimertinib was approved for non-small cell lung cancer in  
7  
8  
9 410 March 2016. Indeed, 86% of the company's payment was allocated to respirology.  
10  
11  
12 411  
13  
14  
15 412 As we have demonstrated, there is an emphatic financial relationship between  
16  
17  
18 413 pharmaceutical companies and oncologists. It is true that the receipt of the  
19  
20  
21 414 abovementioned payments in Japan is not illegal, as they are supposedly given as  
22  
23  
24 415 remuneration for work undertaken or services rendered. However, we believe that there  
25  
26  
27 416 is an ethical problem inherent in such relationships, given that this practice could have  
28  
29  
30 417 been instigated and developed to possibly end up expanding the profit of  
31  
32  
33 418 pharmaceutical companies, rather than promoting the health and well-being of patients.  
34  
35  
36 419 Indeed, even a subtle but reputable financial relationship with the industry, such as  
37  
38  
39 420 collaborating in a field trial, could bias a physician's prescription patterns in a manner  
40  
41  
42 421 that benefits the companies.<sup>12-17</sup> Oncologists in Japan handle extraordinary and very  
43  
44  
45 422 potent life-saving drugs, and have a degree of autonomy in their prescribing actions.  
46  
47  
48 423 Their decisions substantially influence the treatment and outcome for their patients, as  
49  
50  
51 424 well as having significant economic impact due to the high cost of anticancer  
52  
53  
54 425 medications.<sup>3-5</sup> It would therefore appear sensible to have rigorous regulations in place  
55  
56  
57 426 which necessitate the open and accessible reporting of any financial dealings between  
58  
59  
60

1  
2  
3  
4  
5  
6 427 physicians and pharmaceutical companies, so as to avoid any potential nefarious or  
7  
8  
9 428 underhand behavior or undue pressure on physicians to alter their usual treatment  
10  
11  
12 429 practices. Indeed, it is possible that these highly-questionable arrangements may have  
13  
14  
15 430 contributed to the multiple cases of scientific misconduct that have recently been  
16  
17  
18 431 reported in Japan. The most infamous case was when employee misconduct was  
19  
20  
21 432 discovered in a series of clinical trials for Valsartan, an antihypertensive medication  
22  
23  
24 433 manufactured by Novartis Pharma, leading to a retraction of the associated academic  
25  
26  
27 434 papers.<sup>33 34</sup> A breast cancer clinical trial (CREATE-X trial) with a questionable  
28  
29  
30 435 pharmaceutical payment has also been identified.<sup>35 36</sup>  
31  
32  
33 436  
34  
35  
36 437 To prevent similar cases in future, we call for the implementation of a transparent,  
37  
38  
39 438 independent mechanism that would enable a comprehensive assessment of any and all  
40  
41  
42 439 payments being made by any pharmaceutical company to any individual physician or,  
43  
44  
45 440 for that matter, medical institution where the company's products may be used - and not  
46  
47  
48 441 just with respect to oncology. This has to be mandatory and legally-binding on the side  
49  
50  
51 442 of both the company and physician. New schemes along these lines, such as the US's  
52  
53  
54 443 Open Payments Database, may prove successful but it is too soon to know.<sup>37</sup> The  
55  
56  
57 444 Disclosure UK mechanism may not prove to be so effective as it is voluntary.  
58  
59  
60



1  
2  
3  
4  
5  
6 445 Additionally, given that such mechanisms allow for direct comparison between what is  
7  
8  
9 446 allegedly paid and what is allegedly received, it will necessitate a fair, equitable and  
10  
11  
12 447 timely mechanism for dispute settlement, probably involving the use of third parties.<sup>36</sup>  
13  
14

15 448

17  
18 449 **Concluding remarks**  
19

20  
21 450 Japanese certified oncologists receive financial payments directly from pharmaceutical  
22  
23  
24 451 companies, usually from those active in the specialist field of the physician in question.  
25  
26  
27 452 This raises several queries with regard to ethical, medical, corruption and possibly legal  
28  
29  
30 453 issues. The value and specialty targets of the payments varied substantially, which also  
31  
32  
33 454 raises yet more questions as to why. We believe that the lessons learned from our  
34  
35  
36 455 analyses should be shared among the global medical community to help put in place  
37  
38  
39 456 safeguards to prevent undue and unethical inducements from the pharmaceutical  
40  
41  
42 457 industry and to help protect physicians from outside influences. It is essential to  
43  
44  
45 458 establish a robust, comprehensive and legally-binding system for identifying and  
46  
47  
48 459 avoiding any and all potential conflicts of interest, of any nature, involving physicians  
49  
50  
51 460 or other medical professionals, both in Japan and internationally. While it is too early to  
52  
53  
54 461 evaluate whether similar systems, such as the US-based Open Payments Database, will  
55  
56  
57 462 be truly effective, financial transparency is a fundamental component in illustrating that  
58  
59  
60

1  
2  
3  
4  
5  
6 463 there is an open, honest and ethically correct relationship between pharmaceutical  
7  
8  
9 464 companies and physicians. A more comprehensive study is planned, to include all  
10  
11  
12 465 Japanese oncologists, to try and confirm our findings and to help identify the best way  
13  
14  
15 466 forward to ensure that COI are avoided and so that physicians and pharmaceutical  
16  
17  
18 467 companies can work harmoniously and synergistically to provide Japan with the best  
19  
20  
21 468 cancer prophylaxis, treatment and cure possible.  
22  
23

24 469

#### 27 470 **Study Limitations**

28  
29  
30 471 Several limitations in this preliminary study should be acknowledged. First, there could  
31  
32  
33 472 be measurement errors in the affiliations and subspecialties of the included speculates,  
34  
35  
36 473 as we speculated the accuracy of these data in the study year (2016), mainly using the  
37  
38  
39 474 affiliation websites and other data sources on the Internet. Second, there might be minor  
40  
41  
42 475 measurement errors in the payment database as well. Most of the pharmaceutical  
43  
44  
45 476 companies involved did not disclose their payment data in a uniform or readily available  
46  
47  
48 477 format. As a result, we manually entered all the payment data from a variety of formats,  
49  
50  
51 478 and, despite repeated and careful review, the database may include minor errors. Third,  
52  
53  
54 479 the present research analyzed only limited payment types. Currently, Japanese  
55  
56  
57 480 pharmaceutical companies do not disclose payment data for stock interest, loyalties, and  
58  
59  
60

1  
2  
3  
4  
5  
6 481 costs of meals, transportation, and accommodation. As, unlike the pharmaceutical  
7  
8  
9 482 companies, the JMSO and other similar academic and learned societies in Japan, where  
10  
11  
12 483 such data may be registered, refuse to open their databases to public scrutiny, we were  
13  
14  
15 484 not able to consider these data in this study. Fourth, most of the pharmaceutical  
16  
17  
18 485 companies only publish single year data so we could only consider payments made in  
19  
20  
21 486 2016. To understand temporal trends and the extent and distribution of pharmaceutical  
22  
23  
24 487 company payments, a continuous assessment of the payment data is warranted in future.  
25  
26

27 488

### 30 489 **Ethics approval**

32  
33 490 This study was approved by the Institutional Review Board of the Medical Governance  
34  
35  
36 491 Research Institute (MEGRI) on 16th May 2018.  
37  
38

39 492

### 42 493 **Author contributors**

44  
45 494 AO acquired and controlled all sources of data, and oversaw all data analyses.  
46  
47

48 495 AO, HS, YO, TS, YShim, YSom, AT, and TT were involved in the study concept and  
49  
50  
51 496 design.  
52  
53

54 497 AO, HS, YO, TS, YShim, YSom, AT, and TT were involved in the analysis,  
55  
56  
57 498 interpretation of results and formation of conclusions.  
58  
59  
60

1  
2  
3  
4  
5  
6 499 A.O. drafted the manuscript.  
7  
8

9 500  
10  
11

12 501 **Funding statement**  
13  
14

15 502 The Medical Governance Research Institute (MEGRI) is a nonprofit enterprise, which  
16  
17  
18 503 receives donations from various organizations and individuals. Among the donors, Ain  
19  
20  
21 504 Pharmaciez Inc. is part of the pharmaceutical industry. Waseda Chronicle, an  
22  
23  
24 505 independent non-profit news organization dedicated to investigative journalism, also  
25  
26  
27 506 contributed funding to this study. The funders made no contribution whatsoever to  
28  
29  
30 507 either the design of the study, the work carried out or the interpretation of the study  
31  
32  
33 508 findings.  
34  
35

36 509  
37  
38

39 510 **Role of funding source**  
40  
41

42 511 Financial supporters of this research project - Ain Pharmaciez Inc. and Waseda  
43  
44  
45 512 Chronicle - made no contribution whatsoever to either the design of the study, the work  
46  
47  
48 513 carried out or the interpretation of the study findings.  
49  
50

51 514  
52  
53

54 515 **Conflict of Interest statement**  
55  
56  
57  
58  
59  
60

1  
2  
3  
4  
5  
6 516 AO and TT receive personal fees from Medical Network Systems (MNES Inc.); HS has  
7  
8  
9 517 received an honorarium from TAIHO Pharmaceutical Co., Ltd. for research outside the  
10  
11  
12 518 purview of work carried out during this study. All other authors declare no conflict of  
13  
14  
15 519 interests.  
16  
17

18 520

### 21 521 **Acknowledgements**

22  
23  
24 522 The authors thank Dr Masahiro Kami and professor Andy Crump for their constructive  
25  
26  
27 523 opinions and insights and the Waseda Chronicle for extensive support.  
28  
29

30 524

### 33 525 **Data availability statement**

34  
35  
36 526 The datasets analyzed during the current study are available from the corresponding  
37  
38  
39 527 author on reasonable request.  
40  
41

42 528

43 529  
44  
45  
46  
47  
48  
49  
50  
51  
52  
53  
54  
55  
56  
57  
58  
59  
60

1  
2  
3  
4  
5  
6 **530 Figure legends**  
7

8  
9 **531 Figure 1.** Distribution of payments to each subspecialty on an individual company

10  
11  
12 **532** basis. The companies and specialties are sorted in descending order with regard to

13  
14  
15 **533** payment value (proportionally expressed in the box height and band width in Figure 1).

16  
17  
18 **534** Band color represents the payment destination specialties. Due to space limitations,

19  
20  
21 **535** names of companies with payment values of less than ¥10 million (£67.7 thousand,

22  
23  
24 **536** €80.3 thousand, \$91.9 thousand) have been omitted.

25  
26  
27 **537**

28  
29  
30 **538**  
31  
32  
33  
34  
35  
36  
37  
38  
39  
40  
41  
42  
43  
44  
45  
46  
47  
48  
49  
50  
51  
52  
53  
54  
55  
56  
57  
58  
59  
60

**References**

- 539  
540  
541 1. Cancer Information Service NCC, Japan. Cancer registry and statistics. 2018.  
542 Available from: [https://ganjoho.jp/reg\\_stat/statistics/stat/index.html](https://ganjoho.jp/reg_stat/statistics/stat/index.html).
- 543 2. Jemal A, Vinala P, Bray F, et al. The Cancer Atlas, 2nd Edition. GA: American  
544 Cancer Society 2014.
- 545 3. Experts in Chronic Myeloid Leukemia. The price of drugs for chronic myeloid  
546 leukemia (CML) is a reflection of the unsustainable prices of cancer drugs: from  
547 the perspective of a large group of CML experts. *Blood* 2013;121(22):4439-42.  
548 doi: 10.1182/blood-2013-03-490003 [published Online First: 2013/04/27]
- 549 4. Light DW, Kantarjian H. Market spiral pricing of cancer drugs. *Cancer*  
550 2013;119(22):3900-2. doi: 10.1002/cncr.28321 [published Online First:  
551 2013/09/05]
- 552 5. Kantarjian H, Rajkumar SV. Why are cancer drugs so expensive in the United States,  
553 and what are the solutions? *Mayo Clin Proc* 2015;90(4):500-4. doi:  
554 10.1016/j.mayocp.2015.01.014 [published Online First: 2015/03/21]
- 555 6. Odell TW, Gregory MC. Cost of hypertension treatment. *J Gen Intern Med*  
556 1995;10(12):686-8. [published Online First: 1995/12/01]

- 1  
2  
3  
4  
5  
6  
7 557 7. Tibi-Levy Y, de Pouvourville G, Westerloppe J, et al. The cost of treating high blood  
8  
9 558 pressure in general practice in France. *Eur J Health Econ* 2008;9(3):229-36. doi:  
10 11  
12 559 10.1007/s10198-007-0065-2 [published Online First: 2007/06/15]  
13  
14  
15 560 8. Zhuo X, Zhang P, Kahn HS, et al. Change in medical spending attributable to  
16  
17  
18 561 diabetes: national data from 1987 to 2011. *Diabetes Care* 2015;38(4):581-7. doi:  
19  
20  
21 562 10.2337/dc14-1687 [published Online First: 2015/01/17]  
22  
23  
24 563 9. Global Burden of Disease Cancer C, Fitzmaurice C, Akinyemiju TF, et al. Global,  
25  
26  
27 564 Regional, and National Cancer Incidence, Mortality, Years of Life Lost, Years  
28  
29  
30 565 Lived With Disability, and Disability-Adjusted Life-Years for 29 Cancer  
31  
32  
33 566 Groups, 1990 to 2016: A Systematic Analysis for the Global Burden of Disease  
34  
35  
36 567 Study. *JAMA Oncol* 2018;4(11):1553-68. doi: 10.1001/jamaoncol.2018.2706  
37  
38  
39 568 [published Online First: 2018/06/04]  
40  
41  
42 569 10. Zafar SY, Peppercorn JM, Schrag D, et al. The financial toxicity of cancer  
43  
44  
45 570 treatment: a pilot study assessing out-of-pocket expenses and the insured cancer  
46  
47  
48 571 patient's experience. *Oncologist* 2013;18(4):381-90. doi:  
49  
50  
51 572 10.1634/theoncologist.2012-0279 [published Online First: 2013/02/28]  
52  
53  
54  
55  
56  
57  
58  
59  
60



- 1  
2  
3  
4  
5  
6 573 11. Bach PB, Giralt SA, Saltz LB. FDA Approval of Tisagenlecleucel: Promise and  
7  
8  
9 574 Complexities of a \$475000 Cancer Drug. *JAMA* 2017;318(19):1861-62. doi:  
10  
11  
12 575 10.1001/jama.2017.15218 [published Online First: 2017/10/05]  
13  
14  
15 576 12. DeJong C, Aguilar T, Tseng CW, et al. Pharmaceutical Industry-Sponsored Meals  
16  
17  
18 577 and Physician Prescribing Patterns for Medicare Beneficiaries. *JAMA Intern*  
19  
20  
21 578 *Med* 2016;176(8):1114-22. doi: 10.1001/jamainternmed.2016.2765 [published  
22  
23  
24 579 Online First: 2016/06/21]  
25  
26  
27 580 13. De Ferrari A, Gentile C, Davalos L, et al. Attitudes and relationship between  
28  
29  
30 581 physicians and the pharmaceutical industry in a public general hospital in Lima,  
31  
32  
33 582 Peru. *PLoS One* 2014;9(6):e100114. doi: 10.1371/journal.pone.0100114  
34  
35  
36 583 [published Online First: 2014/07/01]  
37  
38  
39 584 14. Fickweiler F, Fickweiler W, Urbach E. Interactions between physicians and the  
40  
41  
42 585 pharmaceutical industry generally and sales representatives specifically and their  
43  
44  
45 586 association with physicians' attitudes and prescribing habits: a systematic  
46  
47  
48 587 review. *BMJ Open* 2017;7(9):e016408. doi: 10.1136/bmjopen-2017-016408  
49  
50  
51 588 [published Online First: 2017/10/01]  
52  
53  
54 589 15. Riese F, Guloksuz S, Roventa C, et al. Pharmaceutical industry interactions of  
55  
56  
57 590 psychiatric trainees from 20 European countries. *Eur Psychiatry*  
58  
59  
60

- 1  
2  
3  
4  
5  
6 591 2015;30(2):284-90. doi: 10.1016/j.eurpsy.2014.09.417 [published Online First:  
7  
8  
9 592 2014/12/03]  
10  
11  
12 593 16. Lee D, Begley CE. Physician report of industry gifts and quality of care. *Health*  
13  
14  
15 594 *Care Manage Rev* 2016;41(3):275-83. doi: 10.1097/HMR.0000000000000042  
16  
17  
18 595 [published Online First: 2014/11/27]  
19  
20  
21 596 17. Montastruc F, Moulis G, Palmaro A, et al. Interactions between medical residents  
22  
23  
24 597 and drug companies: a national survey after the Mediator(R) affair. *PLoS One*  
25  
26  
27 598 2014;9(10):e104828. doi: 10.1371/journal.pone.0104828 [published Online  
28  
29  
30 599 First: 2014/10/04]  
31  
32  
33 600 18. Mitchell AP, Basch EM, Dusetzina SB. Financial Relationships With Industry  
34  
35  
36 601 Among National Comprehensive Cancer Network Guideline Authors. *JAMA*  
37  
38  
39 602 *Oncol* 2016;2(12):1628-31. doi: 10.1001/jamaoncol.2016.2710 [published  
40  
41  
42 603 Online First: 2016/08/26]  
43  
44  
45 604 19. Agrawal S, Brown D. The Physician Payments Sunshine Act--Two Years of the  
46  
47  
48 605 Open Payments Program. *N Engl J Med* 2016;374(10):906-9. doi:  
49  
50  
51 606 10.1056/NEJMp1509103 [published Online First: 2016/03/11]  
52  
53  
54  
55  
56  
57  
58  
59  
60

- 1  
2  
3  
4  
5  
6  
7 607 20. Agrawal S, Brennan N, Budetti P. The Sunshine Act--effects on physicians. *N Engl*  
8  
9 608 *J Med* 2013;368(22):2054-7. doi: 10.1056/NEJMp1303523 [published Online  
10  
11  
12 609 First: 2013/05/31]  
13  
14  
15 610 21. IQVIA. Top 10 Pharmaceutical Markets Worldwide, 2017. 2017. Available from:  
16  
17  
18 611 [https://www.iqvia.com/-/media/iqvia/pdfs/canada-location-](https://www.iqvia.com/-/media/iqvia/pdfs/canada-location-site/top10worldwidesales_en_17.pdf?la=en&hash=C1D59CB0CB2B060CF458)  
19  
20  
21 612 [site/top10worldwidesales\\_en\\_17.pdf?la=en&hash=C1D59CB0CB2B060CF458](https://www.iqvia.com/-/media/iqvia/pdfs/canada-location-site/top10worldwidesales_en_17.pdf?la=en&hash=C1D59CB0CB2B060CF458)  
22  
23  
24 613 [F14CF5390D96F3B28238](https://www.iqvia.com/-/media/iqvia/pdfs/canada-location-site/top10worldwidesales_en_17.pdf?la=en&hash=C1D59CB0CB2B060CF458). accessed 16 October 2018.  
25  
26  
27 614 22. QuintilesIMS. Top 10 Pharmaceutical Markets Worldwide, 2016. 2016. Available  
28  
29  
30 615 from: [https://www.iqvia.com/-/media/iqvia/pdfs/canada-location-site/top-10-](https://www.iqvia.com/-/media/iqvia/pdfs/canada-location-site/top-10-worldwide-sales-en-2016.pdf)  
31  
32  
33 616 [worldwide-sales-en-2016.pdf](https://www.iqvia.com/-/media/iqvia/pdfs/canada-location-site/top-10-worldwide-sales-en-2016.pdf). accessed 2018 16 October.  
34  
35  
36 617 23. Mix Online. Analysis of markets for oncology drugs in Japan. Available from:  
37  
38  
39 618 <https://www.mixonline.jp/Article/tabid/55/artid/59063/Default.aspx>. accessed 16  
40  
41  
42 619 October 2018.  
43  
44  
45 620 24. Japan Pharmaceutical Manufactures Association. Data book 2018 [in Japanese].  
46  
47  
48 621 2018. Available from: <http://www.jpma.or.jp/about/issue/gratis/databook/2018/>.  
49  
50  
51 622 accessed February 17 2019.  
52  
53  
54 623 25. Japan Pharmaceutical Manufactures Association. The Transparency Guidelines for  
55  
56  
57 624 the Relations between Corporate Activities and Medical Institutions [Internet].  
58  
59  
60

- 1  
2  
3  
4  
5  
6 625 Date unknown. Available from:  
7  
8  
9 626 [http://www.jpma.or.jp/english/policies\\_guidelines/pdf/transparency\\_gl\\_intro.pdf](http://www.jpma.or.jp/english/policies_guidelines/pdf/transparency_gl_intro.pdf)  
10  
11  
12 627 . accessed September 17 2018.  
13  
14  
15 628 26. Saito H, Ozaki A, Kobayashi Y, et al. Pharmaceutical Company Payments to  
16  
17  
18 629 Executive Board Members of Professional Medical Associations in Japan.  
19  
20  
21 630 *JAMA Intern Med* 2019 doi: 10.1001/jamainternmed.2018.7283 [published  
22  
23  
24 631 Online First: 2019/02/05]  
25  
26  
27 632 27. National Tax Agency of Japan. Survey results of wages in 2013 (Japanese only).  
28  
29  
30 633 Available from:  
31  
32  
33 634 <https://www.nta.go.jp/information/release/kokuzeicho/2013/minkan/index.htm>.  
34  
35  
36 635 accessed 8 July 2018.  
37  
38  
39 636 28. Riehm P, Hanfler M, Froehlich B. Interactive Sankey diagrams. Information  
40  
41  
42 637 Visualization, 2005 INFOVIS 2005 IEEE Symposium 2005:233-40.  
43  
44  
45 638 29. Marshall DC, Jackson ME, Hattangadi-Gluth JA. Disclosure of Industry Payments  
46  
47  
48 639 to Physicians: An Epidemiologic Analysis of Early Data From the Open  
49  
50  
51 640 Payments Program. *Mayo Clin Proc* 2016;91(1):84-96. doi:  
52  
53  
54 641 10.1016/j.mayocp.2015.10.016 [published Online First: 2016/01/15]  
55  
56  
57  
58  
59  
60

- 1  
2  
3  
4  
5  
6  
7 642 30. Waseda Chronicle. Pharmaceutical payment and physicians. 2018. Available from:  
8  
9 643 <http://www.wasedachronicle.org/articles/docyens/e2/>. accessed 16 October  
10  
11  
12 644 2018.
- 13  
14  
15 645 31. Ismaila N, Salako O, Mutiu J, et al. Oncology Guidelines Usage in a Low- and  
16  
17  
18 646 Middle-Income Country. *J Glob Oncol* 2018(4):1-6. doi: 10.1200/JGO.17.00136  
19  
20  
21 647 [published Online First: 2018/09/23]
- 22  
23  
24 648 32. Sony Life Insurance Co. L. Operation counts of cancer in Japanese hospitals [in  
25  
26  
27 649 Japanese]. 2018. Available from:  
28  
29  
30 650 <https://cs.sonylife.co.jp/lpv/pcms/sca/ct/medical/ranking-cancer/02.html?lpk=>.  
31  
32  
33 651 accessed 16 October 2018.
- 34  
35  
36 652 33. Lancet, Editors. Retraction--Valsartan in a Japanese population with hypertension  
37  
38  
39 653 and other cardiovascular disease (Jikei Heart Study): a randomised, open-label,  
40  
41  
42 654 blinded endpoint morbidity-mortality study. *Lancet* 2013;382(9895):843. doi:  
43  
44  
45 655 10.1016/S0140-6736(13)61847-4 [published Online First: 2013/09/10]  
46  
47  
48 656 34. Narumi H, Takano H, Shindo S, et al. Retraction: Effects of valsartan and  
49  
50  
51 657 amlodipine on cardiorenal protection in Japanese hypertensive patients: the  
52  
53  
54 658 Valsartan Amlodipine Randomized Trial. *Hypertens Res* 2017;40(1):103. doi:  
55  
56  
57 659 10.1038/hr.2016.144 [published Online First: 2016/11/04]  
58  
59  
60

- 1  
2  
3  
4  
5  
6 660 35. Ozaki A. Conflict of Interest and the CREATE-X Trial in the New England Journal  
7  
8  
9 661 of Medicine. *Sci Eng Ethics* 2017 doi: 10.1007/s11948-017-9966-3 [published  
10  
11  
12 662 Online First: 2017/09/17]  
13  
14  
15 663 36. Ozaki A, Takita M, Tanimoto T. A call for improved transparency in financial  
16  
17  
18 664 aspects of clinical trials: a case study of the CREATE-X trial in the New  
19  
20  
21 665 England Journal of Medicine. *Invest New Drugs* 2018;36(3):517-22. doi:  
22  
23  
24 666 10.1007/s10637-018-0577-x [published Online First: 2018/03/09]  
25  
26  
27 667 37. Centers for Medicare & Medicaid. OpenPaymentData.CMS.gov. 2014. Available  
28  
29  
30 668 from: <https://openpaymentsdata.cms.gov/>. accessed 17 September 2018.  
31  
32

33 669  
34  
35  
36  
37  
38  
39  
40  
41  
42  
43  
44  
45  
46  
47  
48  
49  
50  
51  
52  
53  
54  
55  
56  
57  
58  
59  
60

671 **Table 1. Characteristics of oncology specialists and pharmaceutical payment**  
 672 **received by individual doctors.**

| Variable                                                            |                                         |
|---------------------------------------------------------------------|-----------------------------------------|
| <b>1. Characteristics of oncology specialists (N=1080)</b>          |                                         |
| Working institutions (N, %)                                         |                                         |
| University hospitals                                                | 442 (40.9)                              |
| Cancer hospitals                                                    | 183 (16.9)                              |
| Other types of institutions                                         | 455 (42.1)                              |
| Working regions (N, %)                                              |                                         |
| Hokkaido                                                            | 52 (4.8)                                |
| Tohoku                                                              | 58 (5.4)                                |
| Kanto                                                               | 302 (28.0)                              |
| Chubu                                                               | 194 (18.0)                              |
| Kinki                                                               | 208 (19.3)                              |
| Chugoku                                                             | 88 (8.2)                                |
| Shikoku                                                             | 43 (4.0)                                |
| Kyushu                                                              | 135 (12.5)                              |
| Year of certification (N, %)                                        |                                         |
| 2006                                                                | 45 (4.2)                                |
| 2007                                                                | 77 (7.1)                                |
| 2008                                                                | 71 (6.6)                                |
| 2009                                                                | 98 (9.1)                                |
| 2010                                                                | 133 (12.3)                              |
| 2011                                                                | 130 (12.0)                              |
| 2012                                                                | 124 (11.5)                              |
| 2013                                                                | 143 (13.2)                              |
| 2014                                                                | 98 (9.1)                                |
| 2015                                                                | 85 (7.9)                                |
| 2016                                                                | 76 (7.0)                                |
| <b>2. Characteristics of payment (N=1080)</b>                       |                                         |
| Total payment                                                       |                                         |
| Variable                                                            | 585,453,314 [3,963,800]                 |
| Total count of payment                                              | 7,325                                   |
| Type of payment (¥ [£], %)                                          |                                         |
| Speaking                                                            | 467,802,690 [3,167,249], 79.9           |
| Consulting                                                          | 94,682,807 [641,048], 16.2              |
| Writing                                                             | 22,266,186 [150,753], 3.8               |
| Missing                                                             | 701,631 [4,750], 0.1                    |
| Payment per individual specialist                                   |                                         |
| Median value per individual specialist (¥ [£], Interquartile range) | 120,016 [813] (0 [0] – 449,378 [3,043]) |
| Median count per individual specialist (Interquartile range)        | 2 (0–7)                                 |
| Number of oncology specialists with payment (N, %)                  |                                         |
| Any                                                                 | 763 (70.6)                              |
| ¥1 million [£6.8 thousand] or above                                 | 142 (13.1)                              |

|                                       |          |
|---------------------------------------|----------|
| ¥5 million [£33.9 thousand] or above  | 19 (1.8) |
| ¥10 million [£67.7 thousand] or above | 2 (0.2)  |

673 We converted Japanese yen (¥) to Pound Sterling (£), using the average monthly

674 exchange rate for 2016, namely ¥147.7 yen per £1.

675

For peer review only



676 **Table 2. Companies making a payment to oncology specialists and monetary value**  
 677 **and count of their payment**

| Pharmaceutical company                | Monetary value (¥ [£]) | Count |
|---------------------------------------|------------------------|-------|
| Chugai Pharmaceutical Co., Ltd.       | 103,830,493 [702,982]  | 1,248 |
| AstraZeneca plc                       | 51,928,785 [351,583]   | 592   |
| Taiho Pharmaceutical Co., Ltd.        | 50,723,560 [343,423]   | 688   |
| Ono Pharmaceutical Co., Ltd.          | 47,831,737 [323,844]   | 624   |
| Eli Lilly Japan K.K.                  | 44,825,340 [303,489]   | 502   |
| Bristol-Myers Squibb K.K.             | 33,443,966 [226,432]   | 405   |
| Takeda Pharmaceutical Company Ltd.    | 28,280,960 [191,476]   | 306   |
| Novartis Pharma K.K.                  | 27,203,346 [184,180]   | 336   |
| Nippon Boehringer Ingelheim Co., Ltd. | 25,987,859 [175,950]   | 325   |
| Kyowa Hakko Kirin Company, Ltd.       | 20,208,095 [136,819]   | 267   |
| Pfizer Japan Inc.                     | 16,509,478 [111,777]   | 185   |
| Merck Serono Co., Ltd.                | 16,377,746 [110,885]   | 229   |
| Eisai Co., Ltd.                       | 16,309,136 [110,421]   | 220   |
| Celgene Corporation                   | 15,207,296 [102,961]   | 212   |
| Daiichi Sankyo Company, Limited.      | 8,772,101 [59,391]     | 117   |
| Bayer Yakuhin, Ltd.                   | 8,340,481 [56,469]     | 97    |
| Yakult Honsha Company, Limited.       | 8,318,026 [56,317]     | 121   |
| Janssen Pharmaceutical K.K.           | 7,723,516 [52,292]     | 84    |
| MSD K.K.                              | 6,317,468 [42,772]     | 71    |
| Sumitomo Dainippon Pharma Co., Ltd.   | 5,196,201 [35,181]     | 92    |
| Nippon Kayaku Co., Ltd.               | 3,868,780 [26,194]     | 46    |
| Astellas Pharma Inc.                  | 3,590,000 [24,306]     | 53    |
| Nippon Shinyaku Co., Ltd.             | 3,129,497 [21,188]     | 53    |
| Asahi Kasei Pharma Corporation        | 3,102,452 [21,005]     | 45    |
| Sanofi K.K.                           | 2,592,500 [17,552]     | 31    |
| Otsuka Holdings Co., Ltd.             | 2,204,198 [14,923]     | 40    |
| Mochida Pharmaceutical Co., Ltd.      | 2,149,441 [14,553]     | 31    |
| Teijin Pharma Limited.                | 2,099,790 [14,217]     | 27    |

|    |                                        |                    |    |
|----|----------------------------------------|--------------------|----|
| 1  |                                        |                    |    |
| 2  |                                        |                    |    |
| 3  |                                        |                    |    |
| 4  |                                        |                    |    |
| 5  |                                        |                    |    |
| 6  | AbbVie GK,                             | 2,082,626 [14,100] | 17 |
| 7  | Shionogi & Co., Ltd.                   | 1,948,968 [13,195] | 28 |
| 8  |                                        |                    |    |
| 9  | Kyorin Pharmaceutical Co., Ltd.        | 1,918,033 [12,986] | 34 |
| 10 |                                        |                    |    |
| 11 | Tsumura & Co.                          | 1,681,688 [11,386] | 21 |
| 12 |                                        |                    |    |
| 13 | Meiji Seika Pharma Co., Ltd.           | 1,289,000 [8,727]  | 24 |
| 14 | Terumo Corporation                     | 1,214,840 [8,225]  | 16 |
| 15 |                                        |                    |    |
| 16 | Kissei Pharmaceutical Co., Ltd.        | 1,124,840 [7,616]  | 9  |
| 17 | Zeria Pharmaceutical Co., Ltd.         | 946,645 [6,409]    | 12 |
| 18 |                                        |                    |    |
| 19 | Mitsubishi Tanabe Pharma Corporation   | 935,508 [6,334]    | 17 |
| 20 |                                        |                    |    |
| 21 | EA Pharma Co., Ltd.                    | 783,712 [5,306]    | 17 |
| 22 |                                        |                    |    |
| 23 | Taisho Toyama Pharmaceutical Co., Ltd. | 701,631 [4,750]    | 11 |
| 24 | Kowa Company, Ltd.                     | 590,262 [3,996]    | 5  |
| 25 |                                        |                    |    |
| 26 | Hisamitsu Pharmaceutical Co., Inc.     | 539,030 [3,649]    | 11 |
| 27 | Novo Nordisk Pharma Ltd.               | 474,360 [3,212]    | 8  |
| 28 |                                        |                    |    |
| 29 | Sanwa Kagaku Kenkyusho Co., Ltd.       | 445,480 [3,016]    | 4  |
| 30 |                                        |                    |    |
| 31 | Aska Pharmaceutical Co., Ltd.          | 423,206 [2,865]    | 6  |
| 32 |                                        |                    |    |
| 33 | Shire Japan K.K                        | 367,521 [2,488]    | 5  |
| 34 | Nihon Pharmaceutical Co., Ltd.         | 311,836 [2,111]    | 8  |
| 35 |                                        |                    |    |
| 36 | Nippon Chemiphar Co., Ltd.             | 278,425 [1,885]    | 3  |
| 37 | Ayumi Pharmaceutical Corporation       | 226,864 [1,536]    | 3  |
| 38 |                                        |                    |    |
| 39 | Mylan Seiyaku Ltd.                     | 206,240 [1,396]    | 4  |
| 40 |                                        |                    |    |
| 41 | Kracie Holdings, Ltd.                  | 134,056 [908]      | 2  |
| 42 |                                        |                    |    |
| 43 | GlaxoSmithKline K.K.                   | 111,370 [754]      | 2  |
| 44 | Minophagen Pharmaceutical Co.          | 110,440 [748]      | 2  |
| 45 |                                        |                    |    |
| 46 | Maruho Co., Ltd.                       | 103,120 [698]      | 1  |
| 47 | Torii Pharmaceutical Co., Ltd.         | 102,260 [692]      | 2  |
| 48 |                                        |                    |    |
| 49 | EN Otsuka Pharmaceutical Co., Ltd.     | 89,096 [603]       | 2  |
| 50 |                                        |                    |    |
| 51 | Kaken Pharmaceutical Co., Ltd.         | 77,959 [528]       | 1  |
| 52 |                                        |                    |    |
| 53 | Toray Industries, Inc.                 | 77,080 [522]       | 1  |
| 54 | Santen Pharmaceutical Co., Ltd.        | 51,560 [349]       | 1  |
| 55 |                                        |                    |    |
| 56 | Toyama Chemical Co., Ltd.              | 33,410 [226]       | 1  |
| 57 |                                        |                    |    |
| 58 | Bee Brand Medico Dental. Co., Ltd.     | 0 [0]              | 0  |
| 59 |                                        |                    |    |
| 60 |                                        |                    |    |

|                                           |       |   |
|-------------------------------------------|-------|---|
| Biofermin Seiyaku Co., Ltd.               | 0 [0] | 0 |
| Fujimoto Pharmaceutical Corporation       | 0 [0] | 0 |
| Fuso Pharmaceutical Industries, Ltd.      | 0 [0] | 0 |
| Japan Tobacco Inc.                        | 0 [0] | 0 |
| Kyoto Pharmaceutical Industries, Ltd.     | 0 [0] | 0 |
| Maruishi Pharmaceutical Co., Ltd.         | 0 [0] | 0 |
| Nippon Zoki Pharmaceutical Co., Ltd.      | 0 [0] | 0 |
| Otsuka Pharmaceutical Co., Ltd.           | 0 [0] | 0 |
| Otsuka Pharmaceutical Factory, Inc.       | 0 [0] | 0 |
| POLA-Pharma.                              | 0 [0] | 0 |
| Research Institute for Microbial Diseases | 0 [0] | 0 |
| Seikagaku Corporation                     | 0 [0] | 0 |
| Senju Pharmaceutical Co., Ltd.            | 0 [0] | 0 |
| Taisho Pharmaceutical Co., Ltd.           | 0 [0] | 0 |
| Teikoku Seiyaku Co., Ltd.                 | 0 [0] | 0 |
| Toa Eiyo Ltd.                             | 0 [0] | 0 |
| UCB Japan Co., Ltd.                       | 0 [0] | 0 |
| Wakamoto Pharmaceutical Co., Ltd.         | 0 [0] | 0 |

678 We converted Japanese yen (¥) to Pound Sterling (£), using the average monthly  
 679 exchange rate for 2016, namely ¥147.7 yen per £1.

680

681 **Table 3. Characteristics of oncology specialists and pharmaceutical company payments received in 2016, according to the**  
 682 **monetary value of the payment**  
 683

| Variable                                       | High-payment Group (¥1 million [£6.8 thousand] or more)<br>(N=142) | Low-payment Group (¥1 – 1 million [£6.8 thousand])<br>(N=621) | No-payment Group (¥0)<br>(N=317) |
|------------------------------------------------|--------------------------------------------------------------------|---------------------------------------------------------------|----------------------------------|
| <b>Characteristics of oncology specialists</b> |                                                                    |                                                               |                                  |
| <b>Working institutions (N, %)</b>             |                                                                    |                                                               |                                  |
| University hospitals                           | 75 (52.8)                                                          | 248 (39.9)                                                    | 119 (37.5)                       |
| Cancer hospitals                               | 40 (28.2)                                                          | 98 (15.8)                                                     | 45 (14.2)                        |
| Other types of institutions                    | 27 (19.0)                                                          | 275 (44.3)                                                    | 153 (48.3)                       |
| <b>Working regions (N, %)</b>                  |                                                                    |                                                               |                                  |
| Hokkaido                                       | 4 (2.8)                                                            | 37 (6.0)                                                      | 11 (3.5)                         |
| Tohoku                                         | 11 (7.8)                                                           | 30 (4.8)                                                      | 17 (5.4)                         |
| Kanto                                          | 45 (31.7)                                                          | 162 (26.1)                                                    | 95 (30.0)                        |
| Chubu                                          | 23 (16.2)                                                          | 113 (18.2)                                                    | 58 (18.3)                        |
| Kinki                                          | 29 (20.4)                                                          | 108 (17.4)                                                    | 71 (22.4)                        |
| Chugoku                                        | 9 (6.3)                                                            | 60 (9.7)                                                      | 19 (6.0)                         |
| Shikoku                                        | 5 (3.5)                                                            | 31 (5.0)                                                      | 7 (2.2)                          |
| Kyushu                                         | 16 (11.3)                                                          | 80 (12.9)                                                     | 39 (12.3)                        |
| <b>Year of certification (N, %)</b>            |                                                                    |                                                               |                                  |
| 2006                                           | 22 (15.5)                                                          | 21 (3.4)                                                      | 2 (0.6)                          |
| 2007                                           | 15 (10.6)                                                          | 46 (7.4)                                                      | 16 (5.1)                         |

46

|    |      |           |           |           |
|----|------|-----------|-----------|-----------|
| 1  |      |           |           |           |
| 2  |      |           |           |           |
| 3  |      |           |           |           |
| 4  | 2008 | 19 (13.4) | 38 (6.1)  | 14 (4.4)  |
| 5  | 2009 | 19 (13.4) | 56 (9.0)  | 23 (7.3)  |
| 6  | 2010 | 23 (16.2) | 80 (12.9) | 30 (9.5)  |
| 7  | 2011 | 16 (11.3) | 73 (11.8) | 41 (12.9) |
| 8  | 2012 | 9 (6.3)   | 72 (11.6) | 43 (13.6) |
| 9  | 2013 | 9 (6.3)   | 79 (12.7) | 55 (17.4) |
| 10 | 2014 | 5 (3.5)   | 65 (10.5) | 28 (8.8)  |
| 11 | 2015 | 2 (1.4)   | 51 (8.2)  | 32 (10.1) |
| 12 | 2016 | 3 (2.1)   | 40 (6.4)  | 33 (10.4) |

#### 16 Subspecialty of oncologists (N, %)

|    |                  |           |  |  |
|----|------------------|-----------|--|--|
| 17 |                  |           |  |  |
| 18 | Respirology      | 53 (37.3) |  |  |
| 19 | Gastroenterology | 32 (22.5) |  |  |
| 20 | Hematology       | 29 (20.4) |  |  |
| 21 | Breast           | 16 (11.3) |  |  |
| 22 | Head and neck    | 3 (2.1)   |  |  |
| 23 | Urology          | 1 (0.7)   |  |  |
| 24 | Other            | 8 (5.6)   |  |  |

#### 28 Characteristics of pharmaceutical payment

|    |                                |                               |                             |  |
|----|--------------------------------|-------------------------------|-----------------------------|--|
| 29 |                                |                               |                             |  |
| 30 | Total payment                  |                               |                             |  |
| 31 | Total value of payment (¥ [£]) | 418,345,258 [2,832,398]       | 167,108,056 [1,131,402]     |  |
| 32 | Total count of payment         | 4,466                         | 2,859                       |  |
| 33 |                                |                               |                             |  |
| 34 | Type of payment (¥ [£], %)     |                               |                             |  |
| 35 | Speaking                       | 327,075,925 [2,214,461], 78.2 | 140,726,765 [952,788], 84.2 |  |
| 36 | Consulting                     | 73,870,218 [500,137], 17.7    | 20,812,589 [140,911], 12.5  |  |
| 37 | Writing                        | 17,053,868 [115,463], 4.1     | 5,212,318 [35,290], 3.1     |  |

1  
2  
3  
4  
5  
6  
7  
8  
9  
10  
11  
12  
13  
14  
15  
16  
17  
18  
19  
20  
21  
22  
23  
24  
25  
26  
27  
28  
29  
30  
31  
32  
33  
34  
35  
36  
37  
38  
39  
40  
41  
42  
43  
44  
45  
46

|                                                                  |                                                             |                                                  |
|------------------------------------------------------------------|-------------------------------------------------------------|--------------------------------------------------|
| Missing                                                          | 345,247 [2,337], 0.1                                        | 356,384 [2,413], 0.2                             |
| Payment per individual specialist                                |                                                             |                                                  |
| Median monetary value (¥ [£], Interquartile range)               | 2,269,622 [15,366] (1,439,448 [9,746] – 3,681,775 [24,927]) | 171,086 [1,158] (89,096 [603] – 380,886 [2,579]) |
| Median count (Interquartile range)                               | 24 [19 – 38]                                                | 3 (2 – 6)                                        |
| Monetary value of payment according to subspecialties (¥ [£], %) |                                                             |                                                  |
| Respirology                                                      | 166,220,775 [1,125,395], 39.7                               |                                                  |
| Gastroenterology                                                 | 91,319,282 [618,275], 21.8                                  |                                                  |
| Hematology                                                       | 84,186,048 [569,980], 20.1                                  |                                                  |
| Breast                                                           | 42,090,455 [284,973], 10.1                                  |                                                  |
| Head and neck                                                    | 8,689,962 [58,835], 2.1                                     |                                                  |
| Urology                                                          | 5,527,458 [37,424], 1.3                                     |                                                  |
| Other                                                            | 20,311,278 [137,517], 4.9                                   |                                                  |

684 We converted Japanese yen (¥) to Pound Sterling (£), using the average monthly exchange rate for 2016, namely ¥147.7 yen per £1.

685

686 **Table 4. Multivariate regression models for the monetary value of payment on an individual basis**

| Variable                                         | All (N=1080)<br>Relative monetary value (95% CI) | Group A (N=142)<br>Relative monetary value<br>(95% CI) | Groups B and C (N=938)<br>Relative monetary value<br>(95% CI) |
|--------------------------------------------------|--------------------------------------------------|--------------------------------------------------------|---------------------------------------------------------------|
| Year of experience after the board certification | 1.32 (1.26 – 1.39)***                            | 1.09 (1.02 – 1.17)**                                   | 1.12 (1.08 – 1.15)***                                         |
| Types of affiliations                            |                                                  |                                                        |                                                               |
| Other type of institutions                       | Ref.                                             | Ref.                                                   | Ref.                                                          |
| University hospitals                             | 2.98 (2.11 – 4.21)***                            | 2.14 (1.35 – 3.40)**                                   | 1.12 (0.93 – 1.35)                                            |
| Cancer hospitals                                 | 3.19 (2.14 – 4.76)***                            | 1.67 (1.00 – 2.78)*                                    | 1.14 (0.88 – 1.48)                                            |
| Working region                                   |                                                  |                                                        |                                                               |
| Kanto                                            | Ref.                                             | Ref.                                                   | Ref.                                                          |
| Hokkaido                                         | 0.58 (0.25 – 1.35)                               | 0.83 (0.41 – 1.67)                                     | 1.06 (0.76 – 1.48)                                            |
| Tohoku                                           | 1.55 (0.84 – 2.84)                               | 1.35 (0.78 – 2.34)                                     | 1.14 (0.78 – 1.68)                                            |
| Chubu                                            | 0.90 (0.58 – 1.42)                               | 0.85 (0.53 – 1.36)                                     | 1.12 (0.86 – 1.46)                                            |
| Kinki                                            | 1.10 (0.72 – 1.68)                               | 1.06 (0.67 – 1.68)                                     | 0.85 (0.64 – 1.13)                                            |
| Chugoku                                          | 1.16 (0.52 – 2.60)                               | 1.32 (0.58 – 2.97)                                     | 0.94 (0.67 – 1.32)                                            |
| Shikoku                                          | 0.89 (0.43 – 1.83)                               | 1.38 (0.70 – 2.74)                                     | 1.38 (0.95 – 2.02)                                            |
| Kyushu                                           | 1.25 (0.73 – 2.14)                               | 1.30 (0.70 – 2.42)                                     | 1.14 (0.84 – 1.53)                                            |
| Subspecialty                                     |                                                  |                                                        |                                                               |
| Respirology                                      |                                                  | Ref.                                                   |                                                               |
| Gastroenterology                                 |                                                  | 0.78 (0.49 – 1.24)                                     |                                                               |
| Hematology                                       |                                                  | 0.86 (0.59 – 1.27)                                     |                                                               |
| Breast                                           |                                                  | 0.78 (0.45 – 1.36)                                     |                                                               |
| Other†                                           |                                                  | 0.90 (0.50 – 1.64)                                     |                                                               |

1  
2  
3  
4  
5  
6  
7  
8  
9  
10  
11  
12  
13  
14  
15  
16  
17  
18  
19  
20  
21  
22  
23  
24  
25  
26  
27  
28  
29  
30  
31  
32  
33  
34  
35  
36  
37  
38  
39  
40  
41  
42  
43  
44  
45  
46

687 † Other subspecialties included Urology and Head and neck cancer. Due to the small number of physicians in these two subspecialties, they were included in the

688 “other” category; CI=Confidence interval; \* <0.05, \*\* <0.01, \*\*\* <0.001

689

For peer review only



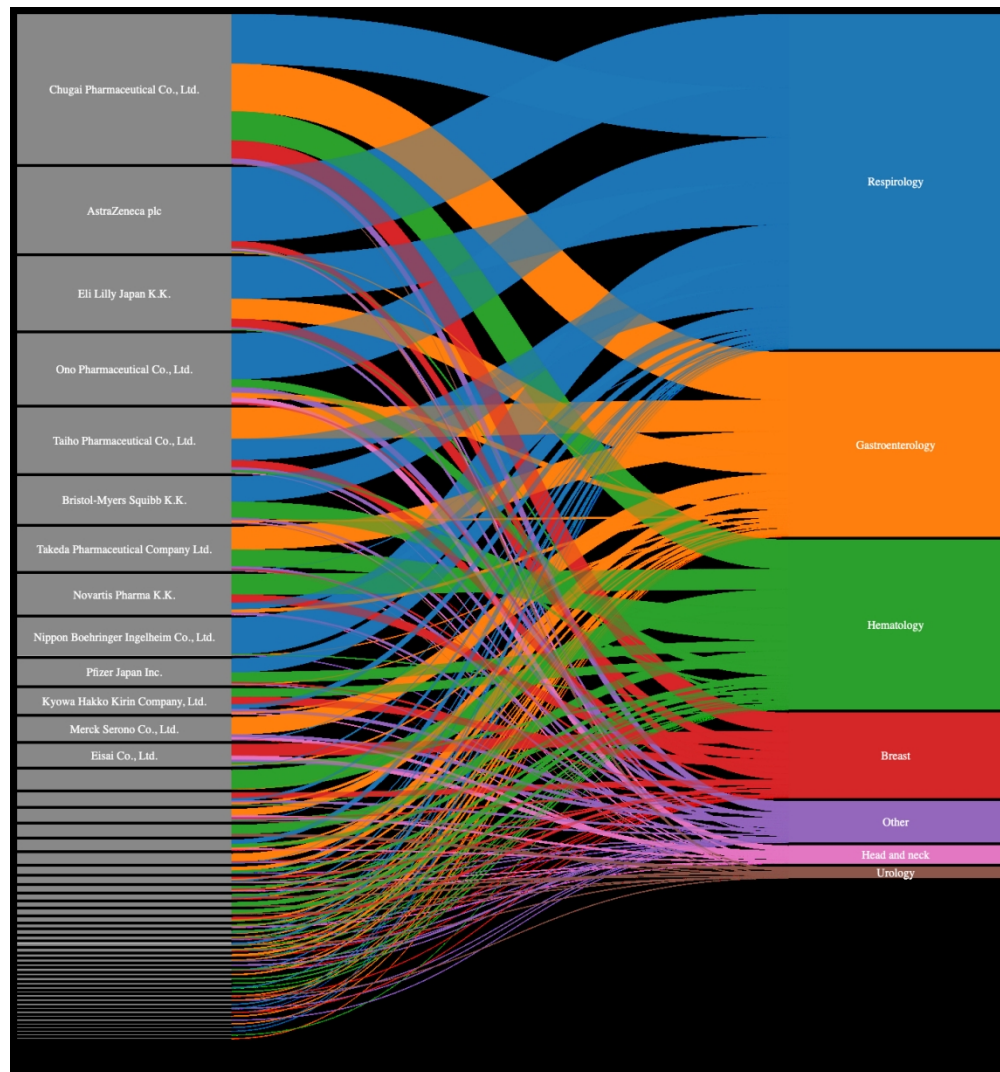

**Figure 1.** Distribution of payments to each subspecialty on an individual company basis. The companies and specialties are sorted in descending order with regard to payment value (proportionally expressed in the box height and band width in Figure 1). Band color represents the payment destination specialties. Due to space limitations, names of companies with payment values of less than ¥10 million (£67.7 thousand, €80.3 thousand, \$91.9 thousand) have been omitted.

493x529mm (72 x 72 DPI)

**Supplementary Material 1. Seventy-eight pharmaceutical companies sampled and the start and end date of the period when the payment data was disclosed**

| Pharmaceutical company                          | Period of the payment data in 2016 |                   |
|-------------------------------------------------|------------------------------------|-------------------|
|                                                 | Start date                         | End date          |
| AbbVie GK                                       | January 1, 2016                    | December 31, 2016 |
| Asahi Kasei Pharma Corporation                  | April 1, 2016                      | March 31, 2017    |
| Aska Pharmaceutical Co., Ltd.                   | April 1, 2016                      | March 31, 2017    |
| Astellas Pharma Inc.                            | April 1, 2016                      | March 31, 2017    |
| AstraZeneca plc                                 | January 1, 2016                    | December 31, 2016 |
| Ayumi Pharmaceutical Corporation                | April 1, 2016                      | March 31, 2017    |
| Bayer Yakuhin, Ltd.                             | January 1, 2016                    | December 31, 2016 |
| Bee Brand Medico Dental. Co., Ltd. <sup>a</sup> | April 1, 2016                      | March 31, 2017    |
| Biofermin Seiyaku Co., Ltd. <sup>b</sup>        | April 1, 2016                      | March 31, 2017    |
| Bristol-Myers Squibb K.K.                       | April 1, 2016                      | March 31, 2017    |
| Celgene Corporation                             | January 1, 2016                    | December 31, 2016 |
| Chugai Pharmaceutical Co., Ltd.                 | January 1, 2016                    | December 31, 2016 |
| Daiichi Sankyo Company, Limited.                | April 1, 2016                      | March 31, 2017    |
| EA Pharma Co., Ltd.                             | April 1, 2016                      | March 31, 2017    |
| Eisai Co., Ltd.                                 | January 1, 2016                    | December 31, 2016 |
| Eli Lilly Japan K.K.                            | January 1, 2016                    | December 31, 2016 |
| EN Otsuka Pharmaceutical Co., Ltd. <sup>c</sup> | January 1, 2016                    | December 31, 2016 |
| Fujimoto Pharmaceutical Corporation             | July 1, 2016                       | June 30, 2017     |
| Fuso Pharmaceutical Industries, Ltd.            | April 1, 2016                      | March 31, 2017    |
| GlaxoSmithKline K.K.                            | January 1, 2016                    | December 31, 2016 |
| Hisamitsu Pharmaceutical Co., Inc.              | March 1, 2016                      | February 28, 2017 |
| Janssen Pharmaceutical K.K.                     | January 1, 2016                    | December 31, 2016 |

|    |                                        |                 |                    |
|----|----------------------------------------|-----------------|--------------------|
| 1  |                                        |                 |                    |
| 2  |                                        |                 |                    |
| 3  |                                        |                 |                    |
| 4  | Japan Tobacco Inc. <sup>d</sup>        | Not available   | Not available      |
| 5  |                                        |                 |                    |
| 6  | Kaken Pharmaceutical Co., Ltd.         | April 1, 2016   | March 31, 2017     |
| 7  |                                        |                 |                    |
| 8  | Kissei Pharmaceutical Co., Ltd.        | April 1, 2016   | March 31, 2017     |
| 9  |                                        |                 |                    |
| 10 | Kowa Company, Ltd.                     | April 1, 2016   | March 31, 2017     |
| 11 |                                        |                 |                    |
| 12 | Kracie Holdings, Ltd.                  | January 1, 2016 | December 31, 2016  |
| 13 |                                        |                 |                    |
| 14 | Kyorin Pharmaceutical Co., Ltd.        | April 1, 2016   | March 31, 2017     |
| 15 |                                        |                 |                    |
| 16 | Kyoto Pharmaceutical Industries, Ltd.  | June 1, 2016    | May 31, 2017       |
| 17 |                                        |                 |                    |
| 18 | Kyowa Hakko Kirin Company, Ltd.        | January 1, 2016 | December 31, 2016  |
| 19 |                                        |                 |                    |
| 20 | Maruho Co., Ltd.                       | October 1, 2016 | September 30, 2017 |
| 21 |                                        |                 |                    |
| 22 | Maruishi Pharmaceutical Co., Ltd.      | April 1, 2016   | March 31, 2017     |
| 23 |                                        |                 |                    |
| 24 | Meiji Seika Pharma Co., Ltd.           | April 1, 2016   | March 31, 2017     |
| 25 |                                        |                 |                    |
| 26 | Merck Serono Co., Ltd.                 | January 1, 2016 | December 31, 2016  |
| 27 |                                        |                 |                    |
| 28 | Minophagen Pharmaceutical Co.          | April 1, 2016   | March 31, 2017     |
| 29 |                                        |                 |                    |
| 30 | Mitsubishi Tanabe Pharma Corporation   | April 1, 2016   | March 31, 2017     |
| 31 |                                        |                 |                    |
| 32 | Mochida Pharmaceutical Co., Ltd.       | April 1, 2016   | March 31, 2017     |
| 33 |                                        |                 |                    |
| 34 | MSD K.K.                               | January 1, 2016 | December 31, 2016  |
| 35 |                                        |                 |                    |
| 36 | Mylan Seiyaku Ltd.                     | January 1, 2016 | December 31, 2016  |
| 37 |                                        |                 |                    |
| 38 | Nihon Pharmaceutical Co., Ltd.         | April 1, 2016   | March 31, 2017     |
| 39 |                                        |                 |                    |
| 40 | Nippon Boehringer Ingelheim Co., Ltd.  | January 1, 2016 | December 31, 2016  |
| 41 |                                        |                 |                    |
| 42 | Nippon Chemiphar Co., Ltd.             | January 1, 2016 | December 31, 2016  |
| 43 |                                        |                 |                    |
| 44 | Nippon Kayaku Co., Ltd.                | April 1, 2016   | March 31, 2017     |
| 45 |                                        |                 |                    |
| 46 | Nippon Shinyaku Co., Ltd.              | April 1, 2016   | March 31, 2017     |
| 47 |                                        |                 |                    |
| 48 | Nippon Zoki Pharmaceutical Co., Ltd.   | April 1, 2016   | March 31, 2017     |
| 49 |                                        |                 |                    |
| 50 | Novartis Pharma K.K.                   | January 1, 2016 | December 31, 2016  |
| 51 |                                        |                 |                    |
| 52 | Novo Nordisk Pharma Ltd.               | January 1, 2016 | December 31, 2016  |
| 53 |                                        |                 |                    |
| 54 | Ono Pharmaceutical Co., Ltd.           | April 1, 2016   | March 31, 2017     |
| 55 |                                        |                 |                    |
| 56 | Otsuka Holdings Co., Ltd. <sup>e</sup> | January 1, 2016 | December 31, 2016  |
| 57 |                                        |                 |                    |
| 58 |                                        |                 |                    |
| 59 |                                        |                 |                    |
| 60 |                                        |                 |                    |

1  
2  
3  
4  
5  
6  
7  
8  
9  
10  
11  
12  
13  
14  
15  
16  
17  
18  
19  
20  
21  
22  
23  
24  
25  
26  
27  
28  
29  
30  
31  
32  
33  
34  
35  
36  
37  
38  
39  
40  
41  
42  
43  
44  
45  
46  
47  
48  
49  
50  
51  
52  
53  
54  
55  
56  
57  
58  
59  
60

|                                                  |                  |                   |
|--------------------------------------------------|------------------|-------------------|
| Otsuka Pharmaceutical Co., Ltd.                  | January 1, 2016  | December 31, 2016 |
| Otsuka Pharmaceutical Factory, Inc. <sup>f</sup> | January 1, 2016  | December 31, 2016 |
| Pfizer Japan Inc.                                | December 1, 2015 | November 30, 2016 |
| POLA-Pharma.                                     | January 1, 2016  | December 31, 2016 |
| Research Institute for Microbial Diseases        | April 1, 2016    | March 31, 2017    |
| Sanofi K.K.                                      | January 1, 2016  | December 31, 2016 |
| Santen Pharmaceutical Co., Ltd.                  | April 1, 2016    | March 31, 2017    |
| Sanwa Kagaku Kenkyusho Co., Ltd.                 | April 1, 2016    | March 31, 2017    |
| Seikagaku Corporation                            | April 1, 2016    | March 31, 2017    |
| Senju Pharmaceutical Co., Ltd.                   | April 1, 2016    | March 31, 2017    |
| Shionogi & Co., Ltd.                             | April 1, 2016    | March 31, 2017    |
| Shire Japan K.K.                                 | January 1, 2016  | December 31, 2016 |
| Sumitomo Dainippon Pharma Co., Ltd.              | April 1, 2016    | March 31, 2017    |
| Taiho Pharmaceutical Co., Ltd.                   | January 1, 2016  | December 31, 2016 |
| Taisho Pharmaceutical Co., Ltd.                  | April 1, 2016    | March 31, 2017    |
| Taisho Toyama Pharmaceutical Co., Ltd.           | April 1, 2016    | March 31, 2017    |
| Takeda Pharmaceutical Company Ltd.               | April 1, 2016    | March 31, 2017    |
| Teijin Pharma Limited.                           | April 1, 2016    | March 31, 2017    |
| Teikoku Seiyaku Co., Ltd.                        | January 1, 2016  | December 31, 2016 |
| Terumo Corporation                               | April 1, 2016    | March 31, 2017    |
| Toa Eiyo Ltd.                                    | April 1, 2016    | March 31, 2017    |
| Toray Industries, Inc.                           | April 1, 2016    | March 31, 2017    |
| Torii Pharmaceutical Co., Ltd.                   | January 1, 2016  | December 31, 2016 |
| Toyama Chemical Co., Ltd.                        | April 1, 2016    | March 31, 2017    |
| Tsumura & Co.                                    | April 1, 2016    | March 31, 2017    |
| UCB Japan Co., Ltd.                              | January 1, 2016  | December 31, 2016 |
| Wakamoto Pharmaceutical Co., Ltd.                | April 1, 2016    | March 31, 2017    |

|                                 |               |                |
|---------------------------------|---------------|----------------|
| Yakult Honsha Company, Limited. | April 1, 2016 | March 31, 2017 |
| Zeria Pharmaceutical Co., Ltd.  | April 1, 2016 | March 31, 2017 |

<sup>a</sup> Affiliated company of Ono Pharmaceutical Co., Ltd.; <sup>b</sup> affiliated company of Taisho Pharmaceutical Co., Ltd.; <sup>c</sup> affiliated company of Otsuka Pharmaceutical Co., Ltd.; <sup>d</sup> the company left the Japan Pharmaceutical Manufacturers Association on March 31, 2018; <sup>e</sup> affiliated company of Otsuka Pharmaceutical Co., Ltd.; <sup>f</sup> affiliated company of Otsuka Pharmaceutical Co., Ltd.; <sup>g</sup> affiliated company of Taisho Pharmaceutical Co., Ltd. and Toyama Chemical Co., Ltd.

**Supplementary Material 2. Monetary value of payment (¥ [£]) in each company according to oncology subspecialty**

| Pharmaceutical company                | Respirology             | Gastroenterology        | Hematology          | Breast                | Head and neck         | Urology            | Other                 | Total                   |
|---------------------------------------|-------------------------|-------------------------|---------------------|-----------------------|-----------------------|--------------------|-----------------------|-------------------------|
| Chugai Pharmaceutical Co., Ltd.       | 24,545,685<br>[166,186] | 23,656,984<br>[160,169] | 14,432,072 [99,807] | 8,958,305<br>[60,652] | 0 [0]                 | 229,104<br>[1,551] | 2,554,519<br>[17,295] | 74,376,669<br>[503,566] |
| AstraZeneca plc                       | 36,577,758<br>[247,649] | 495,596 [3,355]         | 501,165 [3,466]     | 2,882,255<br>[19,514] | 623,673<br>[4,223]    | 890,960<br>[6,032] | 573,556 [3,883]       | 42,544,963<br>[288,050] |
| Eli Lilly Japan K.K.                  | 20,798,349<br>[140,815] | 9,967,102<br>[67,482]   | 556,850 [3,851]     | 4,145,014<br>[28,064] | 0 [0]                 | 0 [0]              | 957,782 [6,485]       | 36,425,097<br>[246,615] |
| Ono Pharmaceutical Co., Ltd.          | 22,619,251<br>[153,143] | 2,504,140<br>[16,954]   | 3,897,950 [26,957]  | 924,372 [6,258]       | 2,383,319<br>[16,136] | 0 [0]              | 2,706,291<br>[18,323] | 35,035,323<br>[237,206] |
| Taiho Pharmaceutical Co., Ltd.        | 10,524,465<br>[71,256]  | 15,397,224<br>[104,247] | 1,280,755 [8,857]   | 3,530,431<br>[23,903] | 222,740<br>[1,508]    | 0 [0]              | 1,436,673<br>[9,727]  | 32,392,288<br>[219,311] |
| Bristol-Myers Squibb K.K.             | 12,428,895<br>[84,150]  | 946,645 [6,409]         | 8,007,520 [55,377]  | 33,411 [226]          | 356,384<br>[2,413]    | 278,426<br>[1,885] | 1,158,248<br>[7,842]  | 23,209,529<br>[157,140] |
| Takeda Pharmaceutical Company Ltd.    | 136,826 [926]           | 11,176,272<br>[75,669]  | 8,354,702 [57,778]  | 523,439 [3,544]       | 57,276 [388]          | 171,829<br>[1,163] | 1,256,893<br>[8,510]  | 21,677,237<br>[146,765] |
| Novartis Pharma K.K.                  | 3,374,513<br>[22,847]   | 1,470,084 [9,953]       | 10,056,724 [69,549] | 4,052,615<br>[27,438] | 77,959 [528]          | 0 [0]              | 954,371 [6,462]       | 19,986,266<br>[135,317] |
| Nippon Boehringer Ingelheim Co., Ltd. | 17,908,315<br>[121,248] | 111,370 [754]           | 445,480 [3,081]     | 0 [0]                 | 0 [0]                 | 0 [0]              | 77,959 [528]          | 18,543,124<br>[125,546] |

|    |                                     |                   |                 |                    |                 |           |              |                 |            |
|----|-------------------------------------|-------------------|-----------------|--------------------|-----------------|-----------|--------------|-----------------|------------|
| 1  |                                     |                   |                 |                    |                 |           |              |                 |            |
| 2  |                                     |                   |                 |                    |                 |           |              |                 |            |
| 3  |                                     |                   |                 |                    |                 |           |              |                 |            |
| 4  |                                     |                   |                 |                    |                 |           |              |                 |            |
| 5  | Pfizer Japan Inc.                   | 6,683,175         | 332,201 [2,249] | 4,834,111 [33,431] | 638,311 [4,322] | 0 [0]     | 22,910 [155] | 538,396 [3,645] | 13,049,104 |
| 6  |                                     | [45,248]          |                 |                    |                 |           |              |                 | [88,349]   |
| 7  |                                     |                   |                 |                    |                 |           |              |                 |            |
| 8  | Kyowa Hakko Kirin Company, Ltd.     | 2,338,770         | 902,097 [6,108] | 3,975,910 [27,496] | 3,669,644       | 111,370   | 0 [0]        | 1,470,089       | 12,467,880 |
| 9  |                                     | [15,835]          |                 |                    | [24,845]        | [754]     |              | [9,953]         | [84,414]   |
| 10 |                                     |                   |                 |                    |                 |           |              |                 |            |
| 11 | Merck Serono Co., Ltd.              | 334,110 [2,262]   | 8,397,065       | 0 [0]              | 33,411 [226]    | 1,258,481 | 0 [0]        | 1,369,851       | 11,392,918 |
| 12 |                                     |                   | [56,852]        |                    |                 | [8,521]   |              | [9,275]         | [77,136]   |
| 13 |                                     |                   |                 |                    |                 |           |              |                 |            |
| 14 | Eisai Co., Ltd.                     | 445,480 [3,016]   | 523,439 [3,544] | 1,180,522 [8,164]  | 5,791,243       | 1,948,977 | 0 [0]        | 1,380,988       | 11,270,649 |
| 15 |                                     |                   |                 |                    | [39,209]        | [13,196]  |              | [9,350]         | [76,308]   |
| 16 |                                     |                   |                 |                    |                 |           |              |                 |            |
| 17 | Celgene Corporation                 | 0 [0]             | 103,120 [698]   | 9,376,553 [64,845] | 0 [0]           | 0 [0]     | 0 [0]        | 0 [0]           | 9,479,673  |
| 18 |                                     |                   |                 |                    |                 |           |              |                 | [64,182]   |
| 19 |                                     |                   |                 |                    |                 |           |              |                 |            |
| 20 | Daiichi Sankyo Company, Limited.    | 1,180,527 [7,993] | 915,086 [6,196] | 222,740 [1,540]    | 2,615,204       | 0 [0]     | 389,796      | 973,096 [6,588] | 6,296,449  |
| 21 |                                     |                   |                 |                    | [17,706]        |           | [2,639]      |                 | [42,630]   |
| 22 |                                     |                   |                 |                    |                 |           |              |                 |            |
| 23 | Bayer Yakuhin, Ltd.                 | 77,959 [528]      | 3,164,949       | 412,069 [2,850]    | 701,634 [4,750] | 863,118   | 278,425      | 612,535 [4,147] | 6,110,689  |
| 24 |                                     |                   | [21,428]        |                    |                 | [5,844]   | [1,885]      |                 | [41,372]   |
| 25 |                                     |                   |                 |                    |                 |           |              |                 |            |
| 26 | Panssen Pharmaceutical K.K.         | 0 [0]             | 0 [0]           | 4,387,980 [30,346] | 0 [0]           | 0 [0]     | 1,252,917    | 0 [0]           | 5,640,897  |
| 27 |                                     |                   |                 |                    |                 |           | [8,483]      |                 | [38,192]   |
| 28 |                                     |                   |                 |                    |                 |           |              |                 |            |
| 29 | MSD K.K.                            | 2,013,013         | 545,715 [3,695] | 1,748,510 [12,092] | 278,425 [1,885] | 529,009   | 0 [0]        | 0 [0]           | 5,114,672  |
| 30 |                                     | [13,629]          |                 |                    |                 | [3,582]   |              |                 | [34,629]   |
| 31 |                                     |                   |                 |                    |                 |           |              |                 |            |
| 32 | Yakult Honsha Company, Limited.     | 288,740 [1,955]   | 3,764,259       | 0 [0]              | 381,548 [2,583] | 0 [0]     | 0 [0]        | 381,548 [2,583] | 4,816,095  |
| 33 |                                     |                   | [25,486]        |                    |                 |           |              |                 | [32,607]   |
| 34 |                                     |                   |                 |                    |                 |           |              |                 |            |
| 35 | Sumitomo Dainippon Pharma Co., Ltd. | 278,425 [1,885]   | 1,626,004       | 1,069,152 [7,394]  | 0 [0]           | 0 [0]     | 0 [0]        | 77,959 [528]    | 3,051,540  |
| 36 |                                     |                   | [11,009]        |                    |                 |           |              |                 | [20,660]   |
| 37 |                                     |                   |                 |                    |                 |           |              |                 |            |
| 38 |                                     |                   |                 |                    |                 |           |              |                 |            |
| 39 |                                     |                   |                 |                    |                 |           |              |                 |            |
| 40 |                                     |                   |                 |                    |                 |           |              |                 |            |
| 41 |                                     |                   |                 |                    |                 |           |              |                 |            |
| 42 |                                     |                   |                 |                    |                 |           |              |                 |            |
| 43 |                                     |                   |                 |                    |                 |           |              |                 |            |
| 44 |                                     |                   |                 |                    |                 |           |              |                 |            |
| 45 |                                     |                   |                 |                    |                 |           |              |                 |            |
| 46 |                                     |                   |                 |                    |                 |           |              |                 |            |

|    |                                  |                 |                 |                    |                      |                  |                    |                             |                       |
|----|----------------------------------|-----------------|-----------------|--------------------|----------------------|------------------|--------------------|-----------------------------|-----------------------|
| 1  |                                  |                 |                 |                    |                      |                  |                    |                             |                       |
| 2  |                                  |                 |                 |                    |                      |                  |                    |                             |                       |
| 3  |                                  |                 |                 |                    |                      |                  |                    |                             |                       |
| 4  |                                  |                 |                 |                    |                      |                  |                    |                             |                       |
| 5  | Nippon Kayaku Co., Ltd.          | 662,651 [4,486] | 668,220 [4,524] | 167,055 [1,155]    | 800,124 [5,417]      | 111,370<br>[754] | 222,740<br>[1,508] | 222,740 [1,508]<br>[19,329] | 2,854,900<br>[15,386] |
| 6  |                                  |                 |                 |                    |                      |                  |                    |                             |                       |
| 7  |                                  |                 |                 |                    |                      |                  |                    |                             |                       |
| 8  | Sanofi K.K.                      | 0 [0]           | 312,500 [2,116] | 890,000 [6,155]    | 370,000 [2,505]      | 100,000<br>[677] | 550,000<br>[3,724] | 50,000 [339]                | 2,272,500<br>[15,386] |
| 9  |                                  |                 |                 |                    |                      |                  |                    |                             |                       |
| 10 |                                  |                 |                 |                    |                      |                  |                    |                             |                       |
| 11 | Astellas Pharma Inc.             | 390,000 [2,640] | 100,000 [677]   | 900,000 [6,224]    | 100,000 [677]        | 0 [0]            | 700,000<br>[4,739] | 0 [0]                       | 2,190,000<br>[14,827] |
| 12 |                                  |                 |                 |                    |                      |                  |                    |                             |                       |
| 13 |                                  |                 |                 |                    |                      |                  |                    |                             |                       |
| 14 | Nippon Shinyaku Co., Ltd.        | 0 [0]           | 0 [0]           | 1,804,194 [12,477] | 0 [0]                | 0 [0]            | 111,370 [754]      | 0 [0]                       | 1,915,564<br>[12,969] |
| 15 |                                  |                 |                 |                    |                      |                  |                    |                             |                       |
| 16 |                                  |                 |                 |                    |                      |                  |                    |                             |                       |
| 17 | Asahi Kasei Pharma Corporation   | 0 [0]           | 114,552 [776]   | 1,659,413 [11,476] | 0 [0]                | 0 [0]            | 111,370 [754]      | 0 [0]                       | 1,885,335<br>[12,765] |
| 18 |                                  |                 |                 |                    |                      |                  |                    |                             |                       |
| 19 |                                  |                 |                 |                    |                      |                  |                    |                             |                       |
| 20 | AbbVie GK,                       | 0 [0]           | 523,439 [3,544] | 245,014 [1,694]    | 1,046,885<br>[7,088] | 0 [0]            | 0 [0]              | 0 [0]                       | 1,815,338<br>[12,291] |
| 21 |                                  |                 |                 |                    |                      |                  |                    |                             |                       |
| 22 |                                  |                 |                 |                    |                      |                  |                    |                             |                       |
| 23 | Otsuka Holdings Co., Ltd.e       | 100,000 [677]   | 440,000 [2,979] | 550,000 [3,804]    | 0 [0]                | 46,286 [313]     | 0 [0]              | 200,000 [1,354]             | 1,336,286 [9,047]     |
| 24 |                                  |                 |                 |                    |                      |                  |                    |                             |                       |
| 25 | Shionogi & Co., Ltd.             | 288,736 [1955]  | 329,984 [2,234] | 309,360 [2,139]    | 206,240 [1,396]      | 0 [0]            | 0 [0]              | 103,120 [698]               | 1,237,440 [8,378]     |
| 26 |                                  |                 |                 |                    |                      |                  |                    |                             |                       |
| 27 | Kyorin Pharmaceutical Co., Ltd.  | 845,584 [5,725] | 72,184 [489]    | 72,184 [499]       | 0 [0]                | 0 [0]            | 206,241<br>[1,396] | 0 [0]                       | 1,196,193 [8,099]     |
| 28 |                                  |                 |                 |                    |                      |                  |                    |                             |                       |
| 29 |                                  |                 |                 |                    |                      |                  |                    |                             |                       |
| 30 | Teijin Pharma Limited.           | 170,000 [1,151] | 70,000 [474]    | 850,000 [5,878]    | 0 [0]                | 0 [0]            | 0 [0]              | 0 [0]                       | 1,090,000 [7,380]     |
| 31 |                                  |                 |                 |                    |                      |                  |                    |                             |                       |
| 32 | Mochida Pharmaceutical Co., Ltd. | 0 [0]           | 378,658 [2,564] | 267,288 [1,848]    | 111,370 [754]        | 0 [0]            | 0 [0]              | 189,329 [1,282]             | 946,645 [6,409]       |
| 33 |                                  |                 |                 |                    |                      |                  |                    |                             |                       |
| 34 | Isumura & Co.                    | 0 [0]           | 779,590 [5,278] | 55,685 [385]       | 55,685 [377]         | 0 [0]            | 0 [0]              | 0 [0]                       | 890,960 [6,032]       |
| 35 |                                  |                 |                 |                    |                      |                  |                    |                             |                       |
| 36 | Terumo Corporation               | 110,440 [748]   | 430,716 [2,916] | 0 [0]              | 0 [0]                | 0 [0]            | 0 [0]              | 110,440 [748]               | 651,596 [4,412]       |
| 37 |                                  |                 |                 |                    |                      |                  |                    |                             |                       |
| 38 |                                  |                 |                 |                    |                      |                  |                    |                             |                       |
| 39 |                                  |                 |                 |                    |                      |                  |                    |                             |                       |
| 40 |                                  |                 |                 |                    |                      |                  |                    |                             |                       |
| 41 |                                  |                 |                 |                    |                      |                  |                    |                             |                       |
| 42 |                                  |                 |                 |                    |                      |                  |                    |                             |                       |
| 43 |                                  |                 |                 |                    |                      |                  |                    |                             |                       |
| 44 |                                  |                 |                 |                    |                      |                  |                    |                             |                       |
| 45 |                                  |                 |                 |                    |                      |                  |                    |                             |                       |
| 46 |                                  |                 |                 |                    |                      |                  |                    |                             |                       |



|    |                                        |                 |                 |                 |               |       |               |                 |                 |
|----|----------------------------------------|-----------------|-----------------|-----------------|---------------|-------|---------------|-----------------|-----------------|
| 1  |                                        |                 |                 |                 |               |       |               |                 |                 |
| 2  |                                        |                 |                 |                 |               |       |               |                 |                 |
| 3  |                                        |                 |                 |                 |               |       |               |                 |                 |
| 4  |                                        |                 |                 |                 |               |       |               |                 |                 |
| 5  | Kowa Company, Ltd.                     | 0 [0]           | 0 [0]           | 0 [0]           | 0 [0]         | 0 [0] | 0 [0]         | 556,851 [3,770] | 556,851 [3,770] |
| 6  |                                        |                 |                 |                 |               |       |               |                 |                 |
| 7  | Meiji Seika Pharma Co., Ltd.           | 103,120 [698]   | 51,560 [349]    | 278,424 [1,925] | 51,560 [349]  | 0 [0] | 0 [0]         | 72,184 [489]    | 556,848 [3,770] |
| 8  |                                        |                 |                 |                 |               |       |               |                 |                 |
| 9  | Zeria Pharmaceutical Co., Ltd.         | 0 [0]           | 445,480 [3,016] | 0 [0]           | 0 [0]         | 0 [0] | 0 [0]         | 0 [0]           | 445,480 [3,016] |
| 10 |                                        |                 |                 |                 |               |       |               |                 |                 |
| 11 | Sanwa Kagaku Kenkyusho Co., Ltd.       | 0 [0]           | 0 [0]           | 445,480 [3,081] | 0 [0]         | 0 [0] | 0 [0]         | 0 [0]           | 445,480 [3,016] |
| 12 |                                        |                 |                 |                 |               |       |               |                 |                 |
| 13 | Novo Nordisk Pharma Ltd.               | 0 [0]           | 0 [0]           | 360,925 [2,496] | 0 [0]         | 0 [0] | 0 [0]         | 0 [0]           | 360,925 [2,444] |
| 14 |                                        |                 |                 |                 |               |       |               |                 |                 |
| 15 | Faisho Toyama Pharmaceutical Co., Ltd. | 311,836 [2,111] | 0 [0]           | 33,411 [231]    | 0 [0]         | 0 [0] | 0 [0]         | 0 [0]           | 345,247 [2,337] |
| 16 |                                        |                 |                 |                 |               |       |               |                 |                 |
| 17 |                                        |                 |                 |                 |               |       |               |                 |                 |
| 18 | Aska Pharmaceutical Co., Ltd.          | 0 [0]           | 111,370 [754]   | 0 [0]           | 77,959 [528]  | 0 [0] | 111,370 [754] | 0 [0]           | 300,699 [2,036] |
| 19 |                                        |                 |                 |                 |               |       |               |                 |                 |
| 20 | Nippon Chemiphar Co., Ltd.             | 0 [0]           | 167,055 [1,131] | 0 [0]           | 0 [0]         | 0 [0] | 0 [0]         | 111,370 [754]   | 278,425 [1,885] |
| 21 |                                        |                 |                 |                 |               |       |               |                 |                 |
| 22 | Ayumi Pharmaceutical Corporation       | 226,864 [1,536] | 0 [0]           | 0 [0]           | 0 [0]         | 0 [0] | 0 [0]         | 0 [0]           | 226,864 [1,536] |
| 23 |                                        |                 |                 |                 |               |       |               |                 |                 |
| 24 | Kissei Pharmaceutical Co., Ltd.        | 111,370 [754]   | 0 [0]           | 0 [0]           | 0 [0]         | 0 [0] | 0 [0]         | 111,370 [754]   | 222,740 [1,508] |
| 25 |                                        |                 |                 |                 |               |       |               |                 |                 |
| 26 | Shire Japan K.K.                       | 0 [0]           | 0 [0]           | 222,740 [1,540] | 0 [0]         | 0 [0] | 0 [0]         | 0 [0]           | 222,740 [1,508] |
| 27 |                                        |                 |                 |                 |               |       |               |                 |                 |
| 28 |                                        |                 |                 |                 |               |       |               |                 |                 |
| 29 | Peijin Pharma Limited.                 | 190,000 [1,286] | 0 [0]           | 0 [0]           | 0 [0]         | 0 [0] | 0 [0]         | 0 [0]           | 190,000 [1,286] |
| 30 |                                        |                 |                 |                 |               |       |               |                 |                 |
| 31 | Hisamitsu Pharmaceutical Co., Inc.     | 22,274 [151]    | 33,411 [226]    | 0 [0]           | 111,370 [754] | 0 [0] | 0 [0]         | 0 [0]           | 167,055 [1,131] |
| 32 |                                        |                 |                 |                 |               |       |               |                 |                 |
| 33 | Sumitomo Dainippon Pharma Co., Ltd.    | 0 [0]           | 0 [0]           | 167,055 [1,155] | 0 [0]         | 0 [0] | 0 [0]         | 0 [0]           | 167,055 [1,131] |
| 34 |                                        |                 |                 |                 |               |       |               |                 |                 |
| 35 | EA Pharma Co., Ltd.                    | 0 [0]           | 154,680 [1,047] | 0 [0]           | 0 [0]         | 0 [0] | 0 [0]         | 0 [0]           | 154,680 [1,047] |
| 36 |                                        |                 |                 |                 |               |       |               |                 |                 |
| 37 | Shire Japan K.K.                       | 0 [0]           | 0 [0]           | 111,370 [770]   | 0 [0]         | 0 [0] | 0 [0]         | 0 [0]           | 111,370 [754]   |
| 38 |                                        |                 |                 |                 |               |       |               |                 |                 |
| 39 |                                        |                 |                 |                 |               |       |               |                 |                 |
| 40 |                                        |                 |                 |                 |               |       |               |                 |                 |
| 41 |                                        |                 |                 |                 |               |       |               |                 |                 |
| 42 |                                        |                 |                 |                 |               |       |               |                 |                 |
| 43 |                                        |                 |                 |                 |               |       |               |                 |                 |
| 44 |                                        |                 |                 |                 |               |       |               |                 |                 |
| 45 |                                        |                 |                 |                 |               |       |               |                 |                 |
| 46 |                                        |                 |                 |                 |               |       |               |                 |                 |

|    |                                      |              |               |              |            |           |           |               |               |
|----|--------------------------------------|--------------|---------------|--------------|------------|-----------|-----------|---------------|---------------|
| 1  |                                      |              |               |              |            |           |           |               |               |
| 2  |                                      |              |               |              |            |           |           |               |               |
| 3  |                                      |              |               |              |            |           |           |               |               |
| 4  |                                      |              |               |              |            |           |           |               |               |
| 5  | Kracie Holdings, Ltd.                | 0 [0]        | 0 [0]         | 0 [0]        | 0 [0]      | 0 [0]     | 0 [0]     | 103,120 [698] | 103,120 [698] |
| 6  |                                      |              |               |              |            |           |           |               |               |
| 7  | Maruho Co., Ltd.                     | 0 [0]        | 103,120 [698] | 0 [0]        | 0 [0]      | 0 [0]     | 0 [0]     | 103,120 [698] |               |
| 8  |                                      |              |               |              |            |           |           |               |               |
| 9  | Mitsubishi Tanabe Pharma Corporation | 77,959 [528] | 0 [0]         | 0 [0]        | 0 [0]      | 0 [0]     | 0 [0]     | 77,959 [528]  |               |
| 10 |                                      |              |               |              |            |           |           |               |               |
| 11 | GlaxoSmithKline K.K.                 | 55,685 [377] | 0 [0]         | 0 [0]        | 0 [0]      | 0 [0]     | 0 [0]     | 55,685 [377]  |               |
| 12 |                                      |              |               |              |            |           |           |               |               |
| 13 | Nihon Pharmaceutical Co., Ltd.       | 0 [0]        | 0 [0]         | 55,685 [385] | 0 [0]      | 0 [0]     | 0 [0]     | 55,685 [377]  |               |
| 14 |                                      |              |               |              |            |           |           |               |               |
| 15 | EN Otsuka Pharmaceutical Co., Ltd.   | 0 [0]        | 33,411 [226]  | 0 [0]        | 0 [0]      | 0 [0]     | 0 [0]     | 33,411 [226]  |               |
| 16 |                                      |              |               |              |            |           |           |               |               |
| 17 |                                      | 166,220,775  | 91,319,282    | 84,186,048   | 42,090,455 | 8,689,962 | 5,527,458 | 20,311,278    | 418,345,258   |
| 18 | All                                  | [1,125,395]  | [618,275]     | [582,200]    | [284,973]  | [58,835]  | [37,424]  | [137,517]     | [2,832,398]   |
| 19 |                                      |              |               |              |            |           |           |               |               |

We converted Japanese yen (¥) to Pound Sterling (£), using the average monthly exchange rate for 2016, namely ¥147.7 yen per £1.

**Supplementary Material 3. List of oncology drugs with Japanese domestic sales of at least ¥5 billion [£33.9 million] in 2016**

| Pharmaceutical company          | Drug name             | 2016 Sales<br>(Billion, ¥) <sup>†</sup> | 2016 Sales<br>(Million, £) <sup>†</sup> | Respirology | Gastroenterology | Hematology | Breast | Urology | Head and<br>neck | Other |
|---------------------------------|-----------------------|-----------------------------------------|-----------------------------------------|-------------|------------------|------------|--------|---------|------------------|-------|
| Astellas Pharma Inc.            | Enzalutamide          | 23.4                                    | 158.4                                   | No          | No               | No         | No     | Yes     | No               | No    |
| Chugai Pharmaceutical Co., Ltd. | Bevacizumab           | 92.1                                    | 623.6                                   | Yes         | Yes              | No         | Yes    | No      | No               | Yes   |
| Chugai Pharmaceutical Co., Ltd. | Trastuzumab           | 34.1                                    | 230.9                                   | No          | Yes              | No         | Yes    | No      | No               | No    |
| Chugai Pharmaceutical Co., Ltd. | Rituximab             | 32.1 <sup>†</sup>                       | 217.3 <sup>†</sup>                      | No          | No               | Yes        | No     | No      | No               | No    |
| Chugai Pharmaceutical Co., Ltd. | Capecitabine          | 12.3                                    | 83.3                                    | No          | Yes              | No         | Yes    | No      | No               | No    |
| Chugai Pharmaceutical Co., Ltd. | Pertuzumab            | 11.9                                    | 80.6                                    | No          | No               | No         | Yes    | No      | No               | No    |
| Chugai Pharmaceutical Co., Ltd. | Alectinib             | 11.9                                    | 80.6                                    | Yes         | No               | No         | No     | No      | No               | No    |
| Chugai Pharmaceutical Co., Ltd. | Erlotinib             | 11.5                                    | 77.9                                    | Yes         | No               | No         | No     | No      | No               | No    |
| Chugai Pharmaceutical Co., Ltd. | Trastuzumab Emtansine | 8.3                                     | 56.2                                    | No          | No               | No         | Yes    | No      | No               | No    |
| Daiichi Sankyo Co., Ltd.        | Denosumab             | 13.9                                    | 94.1                                    | Yes         | Yes              | Yes        | Yes    | Yes     | Yes              | Yes   |
| Eisai Co., Ltd.                 | Eribulin              | 7.8                                     | 52.8                                    | No          | No               | No         | Yes    | No      | No               | Yes   |
| Eli Lilly Japan K.K.            | Pemetrexed            | 37.3                                    | 252.5                                   | Yes         | No               | No         | No     | No      | No               | No    |
| Eli Lilly Japan K.K.            | Ramucirumab           | 28.9                                    | 195.7                                   | Yes         | Yes              | No         | No     | No      | No               | No    |

|    |                                       |                            |                   |                    |     |     |     |     |     |     |     |
|----|---------------------------------------|----------------------------|-------------------|--------------------|-----|-----|-----|-----|-----|-----|-----|
| 1  |                                       |                            |                   |                    |     |     |     |     |     |     |     |
| 2  |                                       |                            |                   |                    |     |     |     |     |     |     |     |
| 3  |                                       |                            |                   |                    |     |     |     |     |     |     |     |
| 4  |                                       |                            |                   |                    |     |     |     |     |     |     |     |
| 5  | Nippon Boehringer Ingelheim Co., Ltd. | Afatinib                   | 8.7               | 58.9               | Yes | No  | No  | No  | No  | No  | No  |
| 6  |                                       |                            |                   |                    |     |     |     |     |     |     |     |
| 7  | Novartis International AG             | Imatinib                   | 27.5              | 186.2              | No  | Yes | Yes | No  | No  | No  | No  |
| 8  |                                       |                            |                   |                    |     |     |     |     |     |     |     |
| 9  | Novartis International AG             | Nilotinib                  | 20.7              | 140.1              | No  | No  | Yes | No  | No  | No  | No  |
| 10 |                                       |                            |                   |                    |     |     |     |     |     |     |     |
| 11 | Novartis International AG             | Everolimus                 | 15.1 <sup>†</sup> | 102.2 <sup>†</sup> | Yes | Yes | No  | Yes | Yes | No  | No  |
| 12 |                                       |                            |                   |                    |     |     |     |     |     |     |     |
| 13 | Ono Pharmaceutical Co., Ltd.          | Nivolumab                  | 103.9             | 703.5              | Yes | No  | Yes | No  | Yes | Yes | Yes |
| 14 |                                       |                            |                   |                    |     |     |     |     |     |     |     |
| 15 | Taiho Pharmaceutical Co., Ltd.        | Tegafur/Gimeracil/Oteracil | 26.9              | 182.1              | Yes | Yes | No  | Yes | No  | Yes | No  |
| 16 |                                       |                            |                   |                    |     |     |     |     |     |     |     |
| 17 | Taiho Pharmaceutical Co., Ltd.        | nab-Paclitaxel             | 20.7              | 140.1              | Yes | Yes | No  | Yes | No  | No  | No  |
| 18 |                                       |                            |                   |                    |     |     |     |     |     |     |     |
| 19 | Taiho Pharmaceutical Co., Ltd.        | Calcium Folate             | 9.7               | 65.7               | No  | Yes | No  | No  | No  | No  | No  |
| 20 |                                       |                            |                   |                    |     |     |     |     |     |     |     |
| 21 | Taiho Pharmaceutical Co., Ltd.        | Tegafur, Uracil            | 6.5               | 44.0               | Yes | Yes | No  | Yes | Yes | Yes | Yes |
| 22 |                                       |                            |                   |                    |     |     |     |     |     |     |     |
| 23 | Takeda Pharmaceutical Co., Ltd.       | Leuprorelin                | 48.6 <sup>†</sup> | 329 <sup>†</sup>   | No  | No  | No  | Yes | Yes | No  | No  |
| 24 |                                       |                            |                   |                    |     |     |     |     |     |     |     |
| 25 | Takeda Pharmaceutical Co., Ltd.       | Panitumumab                | 18.8              | 127.3              | No  | Yes | No  | No  | No  | No  | No  |
| 26 |                                       |                            |                   |                    |     |     |     |     |     |     |     |
| 27 |                                       |                            |                   |                    |     |     |     |     |     |     |     |
| 28 | Yakult Honsha Co., Ltd.               | Oxaliplatin                | 18.4              | 124.6              | No  | Yes | No  | No  | No  | No  | No  |
| 29 |                                       |                            |                   |                    |     |     |     |     |     |     |     |

We converted Japanese yen (¥) to Pound Sterling (£), using the average monthly exchange rate for 2016, namely ¥147.7 yen per £1; A coverage under the Japanese National Health Insurance scheme in specific oncology subspecialty was considered by the end of the fiscal year of 2016 (March 31, 2017); <sup>†</sup> The sales includes that used for conditions other than cancer.

**Supplementary Material 4. Newly-approved oncology drugs and drugs with added indications during the fiscal years of 2015 and 2016.**

| Pharmaceutical company          | Drug name    | Date of approval   | Type of approval | Type of cancer             |
|---------------------------------|--------------|--------------------|------------------|----------------------------|
| AstraZeneca plc                 | Vandetanib   | September 28, 2015 | New approval     | Thyroid cancer             |
| AstraZeneca plc                 | Osimertinib  | March 28, 2016     | New approval     | Non-small cell lung cancer |
| Bayer Yakuhin, Ltd.             | Sorafenib    | February 29, 2016  | Added indication | Thyroid cancer             |
| Bayer Yakuhin, Ltd.             | Xofigo       | March 28, 2016     | New approval     | Prostate cancer            |
| Bristol-Myers Squibb K.K.       | Ipilimumab   | July 3, 2015       | New approval     | Melanoma                   |
| Bristol-Myers Squibb K.K.       | Paclitaxel   | September 24, 2015 | Added indication | Gastric cancer             |
| Bristol-Myers Squibb K.K.       | Elotuzumab   | September 28, 2016 | New approval     | Multiple myeloma           |
| Celgene Corporation             | Lenalidomide | December 21, 2015  | Added indication | Multiple myeloma           |
| Celgene Corporation             | Lenalidomide | March 2, 2017      | Added indication | Adult T-cell leukemia      |
| Chugai Pharmaceutical Co., Ltd. | Capecitabine | November 20, 2015  | Added indication | Gastric cancer             |
| Chugai Pharmaceutical Co., Ltd. | Bevacizumab  | May 23, 2016       | Added indication | Cervical cancer            |
| Chugai Pharmaceutical Co., Ltd. | Capecitabine | August 26, 2016    | Added indication | Rectal cancer              |

|    |                               |                       |                    |                  |                              |
|----|-------------------------------|-----------------------|--------------------|------------------|------------------------------|
| 1  |                               |                       |                    |                  |                              |
| 2  |                               |                       |                    |                  |                              |
| 3  |                               |                       |                    |                  |                              |
| 4  |                               |                       |                    |                  |                              |
| 5  | Eisai Co., Ltd.               | Eribulin              | February 29, 2016  | Added indication | Sarcoma                      |
| 6  |                               |                       |                    |                  |                              |
| 7  | Eli Lilly Japan K.K.          | Ramucirumab           | May 23, 2016       | Added indication | Colorectal cancer            |
| 8  |                               |                       |                    |                  |                              |
| 9  | Eli Lilly Japan K.K.          | Ramucirumab           | June 20, 2016      | Added indication | Non-small cell lung cancer   |
| 10 |                               |                       |                    |                  |                              |
| 11 | GlaxoSmithKline K.K.          | Lapatinib             | November 20, 2015  | Added indication | Breast cancer                |
| 12 |                               |                       |                    |                  |                              |
| 13 | Janssen Pharmaceutical K.K.   | Ibrutinib             | March 28, 2016     | New approval     | Chronic lymphocytic leukemia |
| 14 |                               |                       |                    |                  |                              |
| 15 | Janssen Pharmaceutical K.K.   | Bortezomib            | June 26, 2015      | Added indication | Mantle cell lymphoma         |
| 16 |                               |                       |                    |                  |                              |
| 17 | Janssen Pharmaceutical K.K.   | ibrutinib             | December 2, 2016   | Added indication | Mantle cell lymphoma         |
| 18 |                               |                       |                    |                  |                              |
| 19 |                               |                       |                    |                  |                              |
| 20 | Meiji Seika Pharma Co., Ltd.  | Talaporfin            | May 26, 2015       | Added indication | Esophageal cancer            |
| 21 |                               |                       |                    |                  |                              |
| 22 | Minophagen Pharmaceutical Co. | Bexarotene            | January 22, 2016   | New approval     | Cutaneous T cell lymphoma    |
| 23 |                               |                       |                    |                  |                              |
| 24 | MSD K.K.                      | Peginterferon Alfa-2b | May 26, 2015       | Added indication | Melanoma                     |
| 25 |                               |                       |                    |                  |                              |
| 26 | MSD K.K.                      | Pembrolizumab         | September 28, 2016 | New approval     | Melanoma                     |
| 27 |                               |                       |                    |                  |                              |
| 28 | MSD K.K.                      | Pembrolizumab         | December 19, 2016  | Added indication | Non-small cell lung cancer   |
| 29 |                               |                       |                    |                  |                              |
| 30 |                               |                       |                    |                  |                              |
| 31 | Mylan Seiyaku Ltd.            | Paclitaxel            | September 24, 2015 | Added indication | Gastric cancer               |
| 32 |                               |                       |                    |                  |                              |
| 33 | Nippon Kayaku Co., Ltd.       | Paclitaxel            | September 24, 2015 | Added indication | Gastric cancer               |
| 34 |                               |                       |                    |                  |                              |
| 35 | Nippon Kayaku Co., Ltd.       | Nogitecan             | November 20, 2015  | Added indication | Cervical cancer              |
| 36 |                               |                       |                    |                  |                              |
| 37 | Novartis Pharma K.K.          | Panobinostat          | July 3, 2015       | New approval     | Multiple myeloma             |
| 38 |                               |                       |                    |                  |                              |
| 39 |                               |                       |                    |                  |                              |
| 40 |                               |                       |                    |                  |                              |
| 41 |                               |                       |                    |                  |                              |
| 42 |                               |                       |                    |                  |                              |
| 43 |                               |                       |                    |                  |                              |
| 44 |                               |                       |                    |                  |                              |
| 45 |                               |                       |                    |                  |                              |
| 46 |                               |                       |                    |                  |                              |

|    |                                 |                  |                    |                  |                              |
|----|---------------------------------|------------------|--------------------|------------------|------------------------------|
| 1  |                                 |                  |                    |                  |                              |
| 2  |                                 |                  |                    |                  |                              |
| 3  |                                 |                  |                    |                  |                              |
| 4  |                                 |                  |                    |                  |                              |
| 5  | Novartis Pharma K.K.            | Ruxolitinib      | September 24, 2015 | Added indication | Polycythemia vera            |
| 6  |                                 |                  |                    |                  |                              |
| 7  | Novartis Pharma K.K.            | Dabrafenib       | March 28, 2016     | New approval     | Melanoma                     |
| 8  |                                 |                  |                    |                  |                              |
| 9  | Novartis Pharma K.K.            | Trametinib       | March 28, 2016     | New approval     | Melanoma                     |
| 10 |                                 |                  |                    |                  |                              |
| 11 | Novartis Pharma K.K.            | Ceritinib        | March 28, 2016     | New approval     | Non-small cell lung cancer   |
| 12 |                                 |                  |                    |                  |                              |
| 13 | Novartis Pharma K.K.            | Everolimus       | August 26, 2016    | Added indication | Neuro-endocrine tumor        |
| 14 |                                 |                  |                    |                  |                              |
| 15 | Ono Pharmaceutical Co., Ltd.    | Nivolumab        | February 29, 2016  | Added indication | Melanoma                     |
| 16 |                                 |                  |                    |                  |                              |
| 17 | Ono Pharmaceutical Co., Ltd.    | Nivolumab        | December 17, 2015  | Added indication | Non-small cell lung cancer   |
| 18 |                                 |                  |                    |                  |                              |
| 19 | Ono Pharmaceutical Co., Ltd.    | Carfilzomib      | July 4, 2016       | New approval     | Multiple myeloma             |
| 20 |                                 |                  |                    |                  |                              |
| 21 | Ono Pharmaceutical Co., Ltd.    | Nivolumab        | August 26, 2016    | Added indication | Renal cell cancer            |
| 22 |                                 |                  |                    |                  |                              |
| 23 | Ono Pharmaceutical Co., Ltd.    | Nivolumab        | December 2, 2016   | Added indication | Hodgkin lymphoma             |
| 24 |                                 |                  |                    |                  |                              |
| 25 | Ono Pharmaceutical Co., Ltd.    | Nivolumab        | March 24, 2017     | Added indication | Head and neck cancer         |
| 26 |                                 |                  |                    |                  |                              |
| 27 |                                 |                  |                    |                  |                              |
| 28 | Otsuka Pharmaceutical Co., Ltd. | Ponatinib        | September 28, 2016 | New approval     | Chronic myelogenous leukemia |
| 29 |                                 |                  |                    |                  |                              |
| 30 |                                 |                  |                    |                  | Multiple myeloma             |
| 31 |                                 |                  |                    |                  | Non-Hodgkin lymphoma         |
| 32 | Sanofi K.K.                     | Plerixafor       | December 19, 2016  | New approval     | Hodgkin                      |
| 33 |                                 |                  |                    |                  | lymphoma                     |
| 34 |                                 |                  |                    |                  |                              |
| 35 |                                 |                  |                    |                  |                              |
| 36 | Sanofi K.K.                     | Aflibercept Beta | March 30, 2017     | New approval     | Colorectal cancer            |
| 37 |                                 |                  |                    |                  |                              |
| 38 |                                 |                  |                    |                  |                              |
| 39 |                                 |                  |                    |                  |                              |
| 40 |                                 |                  |                    |                  |                              |
| 41 |                                 |                  |                    |                  |                              |
| 42 |                                 |                  |                    |                  |                              |
| 43 |                                 |                  |                    |                  |                              |
| 44 |                                 |                  |                    |                  |                              |
| 45 |                                 |                  |                    |                  |                              |
| 46 |                                 |                  |                    |                  |                              |

|    |                                    |                  |                    |                  |                    |
|----|------------------------------------|------------------|--------------------|------------------|--------------------|
| 1  |                                    |                  |                    |                  |                    |
| 2  |                                    |                  |                    |                  |                    |
| 3  |                                    |                  |                    |                  |                    |
| 4  |                                    |                  |                    |                  |                    |
| 5  | Shionogi & Co., Ltd.               | Cyclophosphamide | June 26, 2015      | Added indication | Malignant lymphoma |
| 6  |                                    |                  |                    |                  |                    |
| 7  | Shionogi & Co., Ltd.               | Prednisolone     | June 26, 2015      | Added indication | Malignant lymphoma |
| 8  |                                    |                  |                    |                  |                    |
| 9  | Taiho Pharmaceutical Co., Ltd.     | Trabectedin      | September 28, 2015 | New approval     | Sarcoma            |
| 10 |                                    |                  |                    |                  |                    |
| 11 | Takeda Pharmaceutical Company Ltd. | Prednisolone     | June 26, 2015      | Added indication | Malignant lymphoma |
| 12 |                                    |                  |                    |                  |                    |
| 13 |                                    |                  |                    |                  | Prostate cancer    |
| 14 | Takeda Pharmaceutical Company Ltd. | Leuprorelin      | September 28, 2015 | New approval     | Breast cancer      |
| 15 |                                    |                  |                    |                  |                    |
| 16 | Takeda Pharmaceutical Company Ltd. | Ixazomib         | March 30, 2017     | New approval     | Multiple myeloma   |
| 17 |                                    |                  |                    |                  |                    |
| 18 | Yakult Honsha Company, Limited.    | Oxaliplatin      | November 20, 2015  | Added indication | Gastric cancer     |
| 19 |                                    |                  |                    |                  |                    |
| 20 |                                    |                  |                    |                  |                    |
| 21 |                                    |                  |                    |                  |                    |
| 22 |                                    |                  |                    |                  |                    |
| 23 |                                    |                  |                    |                  |                    |
| 24 |                                    |                  |                    |                  |                    |
| 25 |                                    |                  |                    |                  |                    |
| 26 |                                    |                  |                    |                  |                    |
| 27 |                                    |                  |                    |                  |                    |
| 28 |                                    |                  |                    |                  |                    |
| 29 |                                    |                  |                    |                  |                    |
| 30 |                                    |                  |                    |                  |                    |
| 31 |                                    |                  |                    |                  |                    |
| 32 |                                    |                  |                    |                  |                    |
| 33 |                                    |                  |                    |                  |                    |
| 34 |                                    |                  |                    |                  |                    |
| 35 |                                    |                  |                    |                  |                    |
| 36 |                                    |                  |                    |                  |                    |
| 37 |                                    |                  |                    |                  |                    |
| 38 |                                    |                  |                    |                  |                    |
| 39 |                                    |                  |                    |                  |                    |
| 40 |                                    |                  |                    |                  |                    |
| 41 |                                    |                  |                    |                  |                    |
| 42 |                                    |                  |                    |                  |                    |
| 43 |                                    |                  |                    |                  |                    |
| 44 |                                    |                  |                    |                  |                    |
| 45 |                                    |                  |                    |                  |                    |
| 46 |                                    |                  |                    |                  |                    |



**STROBE 2007 (v4) Statement—Checklist of items that should be included in reports of *cross-sectional studies***

| Section/Topic                | Item # | Recommendation                                                                                                                                                                       | Reported on page # |
|------------------------------|--------|--------------------------------------------------------------------------------------------------------------------------------------------------------------------------------------|--------------------|
| <b>Title and abstract</b>    | 1      | (a) Indicate the study's design with a commonly used term in the title or the abstract                                                                                               | 1                  |
|                              |        | (b) Provide in the abstract an informative and balanced summary of what was done and what was found                                                                                  | 2-4                |
| <b>Introduction</b>          |        |                                                                                                                                                                                      |                    |
| Background/rationale         | 2      | Explain the scientific background and rationale for the investigation being reported                                                                                                 | 5-10               |
| Objectives                   | 3      | State specific objectives, including any prespecified hypotheses                                                                                                                     | 10                 |
| <b>Methods</b>               |        |                                                                                                                                                                                      |                    |
| Study design                 | 4      | Present key elements of study design early in the paper                                                                                                                              | 10-14              |
| Setting                      | 5      | Describe the setting, locations, and relevant dates, including periods of recruitment, exposure, follow-up, and data collection                                                      | 10-13              |
| Participants                 | 6      | (a) Give the eligibility criteria, and the sources and methods of selection of participants                                                                                          | 10-11              |
| Variables                    | 7      | Clearly define all outcomes, exposures, predictors, potential confounders, and effect modifiers. Give diagnostic criteria, if applicable                                             | 13-14              |
| Data sources/<br>measurement | 8*     | For each variable of interest, give sources of data and details of methods of assessment (measurement). Describe comparability of assessment methods if there is more than one group | 11-14              |
| Bias                         | 9      | Describe any efforts to address potential sources of bias                                                                                                                            | Not applicable     |
| Study size                   | 10     | Explain how the study size was arrived at                                                                                                                                            | Not applicable     |
| Quantitative variables       | 11     | Explain how quantitative variables were handled in the analyses. If applicable, describe which groupings were chosen and why                                                         | 13-14              |
| Statistical methods          | 12     | (a) Describe all statistical methods, including those used to control for confounding                                                                                                | 13-14              |
|                              |        | (b) Describe any methods used to examine subgroups and interactions                                                                                                                  | 13-14              |
|                              |        | (c) Explain how missing data were addressed                                                                                                                                          | Not applicable     |
|                              |        | (d) If applicable, describe analytical methods taking account of sampling strategy                                                                                                   | 13-14              |
|                              |        | (e) Describe any sensitivity analyses                                                                                                                                                | 13-14              |

|                          |     |                                                                                                                                                                                                              |                |
|--------------------------|-----|--------------------------------------------------------------------------------------------------------------------------------------------------------------------------------------------------------------|----------------|
| <b>Results</b>           |     |                                                                                                                                                                                                              |                |
| Participants             | 13* | (a) Report numbers of individuals at each stage of study—eg numbers potentially eligible, examined for eligibility, confirmed eligible, included in the study, completing follow-up, and analysed            | 15             |
|                          |     | (b) Give reasons for non-participation at each stage                                                                                                                                                         | 15             |
|                          |     | (c) Consider use of a flow diagram                                                                                                                                                                           | Not applicable |
| Descriptive data         | 14* | (a) Give characteristics of study participants (eg demographic, clinical, social) and information on exposures and potential confounders                                                                     | 15             |
|                          |     | (b) Indicate number of participants with missing data for each variable of interest                                                                                                                          | Not applicable |
| Outcome data             | 15* | Report numbers of outcome events or summary measures                                                                                                                                                         | 16-18          |
| Main results             | 16  | (a) Give unadjusted estimates and, if applicable, confounder-adjusted estimates and their precision (eg, 95% confidence interval). Make clear which confounders were adjusted for and why they were included | 18             |
|                          |     | (b) Report category boundaries when continuous variables were categorized                                                                                                                                    | 13             |
|                          |     | (c) If relevant, consider translating estimates of relative risk into absolute risk for a meaningful time period                                                                                             | Not applicable |
| Other analyses           | 17  | Report other analyses done—eg analyses of subgroups and interactions, and sensitivity analyses                                                                                                               | 13-14          |
| <b>Discussion</b>        |     |                                                                                                                                                                                                              |                |
| Key results              | 18  | Summarise key results with reference to study objectives                                                                                                                                                     | 21             |
| Limitations              | 19  | Discuss limitations of the study, taking into account sources of potential bias or imprecision. Discuss both direction and magnitude of any potential bias                                                   | 27-28          |
| Interpretation           | 20  | Give a cautious overall interpretation of results considering objectives, limitations, multiplicity of analyses, results from similar studies, and other relevant evidence                                   | 21-25          |
| Generalisability         | 21  | Discuss the generalisability (external validity) of the study results                                                                                                                                        | 25-26          |
| <b>Other information</b> |     |                                                                                                                                                                                                              |                |
| Funding                  | 22  | Give the source of funding and the role of the funders for the present study and, if applicable, for the original study on which the present article is based                                                | 29             |

\*Give information separately for cases and controls in case-control studies and, if applicable, for exposed and unexposed groups in cohort and cross-sectional studies.

**Note:** An Explanation and Elaboration article discusses each checklist item and gives methodological background and published examples of transparent reporting. The STROBE checklist is best used in conjunction with this article (freely available on the Web sites of PLoS Medicine at <http://www.plosmedicine.org/>, Annals of Internal Medicine at <http://www.annals.org/>, and Epidemiology at <http://www.epidem.com/>). Information on the STROBE Initiative is available at [www.strobe-statement.org](http://www.strobe-statement.org).

# BMJ Open

## Pharmaceutical payments to certified oncology specialists in Japan in 2016: a retrospective observational cross-sectional analysis

|                                 |                                                                                                                                                                                                                                                                                                                                                                                                                                                                                                                                                                                                                                 |
|---------------------------------|---------------------------------------------------------------------------------------------------------------------------------------------------------------------------------------------------------------------------------------------------------------------------------------------------------------------------------------------------------------------------------------------------------------------------------------------------------------------------------------------------------------------------------------------------------------------------------------------------------------------------------|
| Journal:                        | <i>BMJ Open</i>                                                                                                                                                                                                                                                                                                                                                                                                                                                                                                                                                                                                                 |
| Manuscript ID                   | bmjopen-2018-028805.R2                                                                                                                                                                                                                                                                                                                                                                                                                                                                                                                                                                                                          |
| Article Type:                   | Research                                                                                                                                                                                                                                                                                                                                                                                                                                                                                                                                                                                                                        |
| Date Submitted by the Author:   | 11-Aug-2019                                                                                                                                                                                                                                                                                                                                                                                                                                                                                                                                                                                                                     |
| Complete List of Authors:       | Ozaki, Akihiko; Medical Governance Research Institute; Jyoban Hospital of Tokiwa Foundation, Department of Breast Surgery<br>Saito, Hiroaki; Sendai Kousei Hospital, Department of Gastroenterology<br>Onoue, Yosuke; College of Humanities and Sciences, Nihon University<br>Sawano, Toyoaki; Minamisoma Municipal General Hospital, Department of Surgery<br>Shimada, Yuki; Minamisoma Municipal General Hospital, Department of Neurosurgery<br>Somekawa, Yurie; Medical Governance Research Institute<br>Tsuji, Aritsune; Medical Governance Research Institute<br>Tanimoto, Tetsuya; Medical Governance Research Institute |
| <b>Primary Subject Heading</b>: | Ethics                                                                                                                                                                                                                                                                                                                                                                                                                                                                                                                                                                                                                          |
| Secondary Subject Heading:      | Oncology, Ethics, Health policy                                                                                                                                                                                                                                                                                                                                                                                                                                                                                                                                                                                                 |
| Keywords:                       | conflicts of interest, oncology specialist, Japan, industry payment, Japanese Society of Medical Oncology                                                                                                                                                                                                                                                                                                                                                                                                                                                                                                                       |
|                                 |                                                                                                                                                                                                                                                                                                                                                                                                                                                                                                                                                                                                                                 |

SCHOLARONE™  
Manuscripts

1  
2  
3  
4  
5  
6  
7 **BMJ Open, Research article**  
8

9 **Title:**  
10

11  
12 **Pharmaceutical payments to certified oncology specialists in Japan in 2016: a**  
13  
14  
15 **retrospective observational cross-sectional analysis**  
16  
17

18  
19  
20  
21 **Authors:**  
22

23  
24 Akihiko Ozaki, MD<sup>1,2</sup>, Hiroaki Saito, MD<sup>3</sup>, Yosuke Onoue, PhD<sup>4</sup>, Toyoaki Sawano,  
25  
26  
27 MD<sup>5</sup>, Yuki Shimada<sup>6</sup>, MD, Yurie Somekawa<sup>1</sup>, MD, Aritsune Tsuji<sup>1</sup>, Tetsuya Tanimoto,  
28  
29  
30 MD<sup>1</sup>  
31  
32

33  
34  
35  
36 **Affiliations:**  
37

38  
39 <sup>1</sup> Medical Governance Research Institute, Minato-ku, Tokyo, Japan  
40

41  
42 <sup>2</sup> Department of Breast Surgery, Jyoban Hospital of Tokiwa Foundation, Jyoban-  
43

44  
45 Kamiyunaga-Yamachi, Iwaki, Japan  
46

47  
48 <sup>3</sup> Department of Gastroenterology, Sendai Kousei Hospital, Sendai, Miyagi, Japan  
49

50  
51 <sup>4</sup> Department of Information Science, College of Humanities and Sciences, Nihon  
52

53  
54 University, Setagaya-ku, Tokyo, Japan  
55  
56  
57  
58  
59  
60

1  
2  
3  
4  
5  
6  
7 18 <sup>5</sup> Department of Surgery, Minamisoma Municipal General Hospital, Minamisoma,

8  
9  
10 19 Fukushima, Japan

11  
12 20 <sup>6</sup> Department of Neurosurgery, Minamisoma Municipal General Hospital, Minamisoma,

13  
14  
15 21 Fukushima, Japan

16  
17  
18 22

19  
20  
21 23 **Corresponding author:**

22  
23  
24 24 Akihiko Ozaki, MD, Medical Governance Research Institute, Minato-ku, Tokyo,

25  
26  
27 25 1080074 Japan.

28  
29  
30 26 Telephone: 81-3-6455-7401

31  
32  
33 27 FAX: 81-3-3441-7505

34  
35  
36 28 Email address: ozakiakihiko@gmail.com.

37  
38  
39 29

40  
41  
42 30 **Abstract (296 words)**

43  
44  
45 31 Objective: This study investigated payments made by pharmaceutical companies to

46  
47  
48 32 oncology specialists in Japan, what the payments were for, and whether the receipt of

49  
50  
51 33 such payments contravened any Conflict of Interest (COI) regulations.

52  
53  
54 34

1  
2  
3  
4  
5  
6 35 Design, Setting, and Participants: Payment data to physicians, as reported by all  
7  
8  
9 36 pharmaceutical companies belonging to the Japan Pharmaceutical Manufacturers  
10  
11  
12 37 Association (JPMA), were retrospectively extracted for 2016. Of the named individual  
13  
14  
15 38 recipients of payments, all certified oncologists were identified, using certification data  
16  
17  
18 39 from the Japanese Society of Medical Oncology (JSMO). The individual specializations  
19  
20  
21 40 of each of the oncologists was also identified.  
22

23  
24 41  
25  
26  
27 42 Outcome: Payments to individual cancer specialists and what they were for were  
28  
29  
30 43 identified. Factors associated with receipt of higher value payments and payment flows  
31  
32  
33 44 to specialties were determined. Companies selling oncology drugs with annual sales of  
34  
35  
36 45  $\geq$ ¥5 billion [£33.9 million, €40.2 million, \$46.0 million] (high revenue generating  
37  
38  
39 46 drugs) were identified.  
40

41  
42 47  
43  
44  
45 48 Results: In total, 59 companies made at least one payment to oncologists. Of the 1080  
46  
47  
48 49 oncology specialists identified, 763 (70.6%) received at least one payment, while 317  
49  
50  
51 50 received no payment. Of the 763, some 142 (13.1%) receiving at least ¥1 million  
52  
53  
54 51 [£6,800, €8,000, \$9,200] accounted for 71.5% of the total. After adjustment of  
55  
56  
57 52 covariates, working for university hospitals and cancer hospitals and male gender were  
58  
59  
60

1  
2  
3  
4  
5  
6 53 key factors associated with larger monetary payments. Payments preferentially targeted  
7  
8  
9 54 on cancer specialties using high revenue generating drugs. The JSMO has its own COI  
10  
11  
12 55 policy for its members but the policy did not mention any specific guidelines for  
13  
14  
15 56 certified oncology specialists.  
16  
17

18 57

20  
21 58 Conclusion: Financial relationships were identified and quantified between  
22  
23  
24 59 pharmaceutical companies and oncology specialists, but the extent and worth varied  
25  
26  
27 60 significantly. Given the frequency and amounts of money involved in such linkages, it  
28  
29  
30 61 would be beneficial for specific COI regulations to be developed and policed for  
31  
32  
33 62 oncologists.  
34  
35

36 63

37  
38  
39 64 **Keywords:** conflict of interest; oncology specialist; Japan; industry payment; Japanese  
40  
41  
42 65 Society of Medical Oncology  
43  
44

45 66

46  
47  
48 67 **Article summary (Strengths and limitations of this study):**  
49

50  
51 68 ✓ We considered oncology specialists certified by the Japan Society of Medical  
52  
53  
54 69 Oncology, one of the largest professional medical associations in Japan's clinical  
55  
56  
57 70 oncology field.  
58  
59  
60

- 1  
2  
3  
4  
5  
6  
7 71 ✓ The authors independently organized payment data for speaking, writing, and  
8  
9  
10 72 consulting work, as published by the major pharmaceutical companies, and created  
11  
12 73 a single uniform payment database.
- 13  
14  
15 74 ✓ Accuracy of the affiliations and subspecialties of some oncology specialist in the  
16  
17  
18 75 study year (2016) were estimated using the data on relevant websites and other data  
19  
20  
21 76 sources on the Internet, possibly causing some measurement errors in these  
22  
23  
24 77 variables.
- 25  
26  
27 78 ✓ This study only covered limited types of payment data in the single year (2016),  
28  
29  
30 79 which hampered a comprehensive and/or longitudinal analysis of the type and value  
31  
32  
33 80 of the payments among the oncology specialists.

34  
35  
36 8137  
38  
39 8240  
41  
42 83 **Word count: 4,964**43  
44  
45 8446  
47  
48 85 **Introduction**

49  
50  
51 86 Increasing global attention is being paid with respect to how pharmaceutical companies  
52  
53  
54 87 (Pharma) operate and their relationships with regard to payments they make to doctors  
55  
56  
57 88 working in national health systems. There is growing concern that specialised  
58  
59  
60



1  
2  
3  
4  
5  
6  
7 89 physicians receiving financial payments from Pharma commercially connected with  
8  
9  
10 90 their field of expertise may be inadvertently or unethically being influenced and that  
11  
12 91 their impartiality and ability to act in the best interests of their patients is being  
13  
14  
15 92 compromised. The approval earlier this year by the US Federal Drugs Administration  
16  
17  
18 93 (FDA) of anasemnogene abeparvovec-xioi (Zolgensma®), a gene therapy for  
19  
20  
21 94 children less than 2 years old with spinal muscular atrophy which is now the most  
22  
23  
24 95 expensive drug on the market, illustrates the amounts of money that are involved. If a  
25  
26  
27 96 physician prescribes Zolgensma treatment, and a single administration is all that is  
28  
29  
30 97 required, it costs \$2.1 million (£1.6 million, €1.9 million, ¥231.2 million) per patient. In  
31  
32  
33 98 Japan, a new treatment for leukemia and other hematologic cancers was approved in  
34  
35  
36 99 May which will cost ¥33.5 million (£226,800, €269,000, \$307,800). The drug,  
37  
38  
39 100 Tisagenlecleucel (Kymriah®), manufactured and marketed by Novartis Pharma KK, is  
40  
41  
42 101 the most expensive drug on the Japanese market and is covered under Japan's national  
43  
44  
45 102 health insurance. In view of the sums of money involved and the possibility of  
46  
47  
48 103 corruption creeping into the system, there is an increasing need for transparency with  
49  
50  
51 104 respect to all forms of payment, or gifts of any kind, being dispensed by Pharma to  
52  
53  
54 105 physicians. According to the World Medical Association (WMA), "although the  
55  
56  
57 106 cooperation between physicians and commercial enterprises may lead to significant  
58  
59  
60

1  
2  
3  
4  
5  
6 107 advances in medicine, including the development of new drugs and treatments, it may  
7  
8  
9 108 also result in a conflict of interest (COI) between commercial enterprises and physicians  
10  
11  
12 109 that may have adverse effects on patients' care and the reputation of physicians".  
13  
14  
15 110 Consequently, medical and governmental facilities worldwide are considering steps to  
16  
17  
18 111 help create transparency in the relationship between physicians and the pharmaceutical  
19  
20  
21 112 industry, as exemplified by the USA's Physician Payments Sunshine Act, enacted in  
22  
23  
24 113 2010, and the US government's Open Payments Database  
25  
26  
27 114 (<https://openpaymentsdata.cms.gov>).<sup>1 2</sup> In Japan, members of the Japan Pharmaceutical  
28  
29  
30 115 Manufacturers Association (JPMA) are attempting to improve the transparency and  
31  
32  
33 116 acceptability of the relationship between corporate activities of Pharma and medical  
34  
35  
36 117 institutions and individual physicians and, in 2015, the JPMA introduced a self-  
37  
38  
39 118 regulatory Guideline for all its members to promote clarity and deeper understanding of  
40  
41  
42 119 the beneficial contribution that Pharma makes to medicine and pharmacy, and so that  
43  
44  
45 120 Pharma activities are conducted with high ethical standards and for maximum benefit to  
46  
47  
48 121 patients.  
49  
50  
51 122  
52  
53  
54 123 Cancer has been the leading cause of mortality in Japan since 1981. In 2016, there were  
55  
56  
57 124 372,986 cancer deaths in Japan, with malignant neoplasms costing the nation an  
58  
59  
60

1  
2  
3  
4  
5  
6 125 estimated ¥3.6 trillion [£24.4 billion, €28.9 billion, \$33.1 billion] in medical  
7  
8  
9 126 expenditure. In 2016, lung cancer was the leading cause of cancerous deaths (52,430) in  
10  
11  
12 127 males, followed by gastric cancer (29,854) and colorectal cancer (27,026), while  
13  
14  
15 128 colorectal cancer was the leading cause of cancerous death in females (23,073),  
16  
17  
18 129 followed by lung cancer (21,408) and colorectal cancer (17,405).<sup>3</sup> The risk factors for  
19  
20  
21 130 cancer are diverse, including tobacco use, infection, obesity, radiation exposure,  
22  
23  
24 131 reproductive and hormonal factors, and other environmental and occupational pollutants  
25  
26  
27 132 and carcinogens.<sup>4</sup> In Japan, principally because of its ageing population, cancer rates are  
28  
29  
30 133 forecast to continue to rise for the foreseeable future.<sup>3</sup>  
31  
32  
33 134  
34  
35  
36 135 For the pharmaceutical industry, medical and therapeutic practice generates substantial  
37  
38  
39 136 income, allowing it exploit various opportunities to accomplish the goal of the  
40  
41  
42 137 maximization of profits.<sup>5-7</sup> From the 1950s, the main business model of the Pharma was  
43  
44  
45 138 the production of low-price drugs to treat diseases and conditions that were primarily  
46  
47  
48 139 chronic and prevalent (e.g. hypertension and diabetes).<sup>8-10</sup> Following advances in drug  
49  
50  
51 140 development against infectious and chronic diseases, cancer became an ever-increasing  
52  
53  
54 141 and major problem, with 17.2 million incidents and 213.2 million cancer-associated  
55  
56  
57 142 disability-adjusted life-years (DALY) lost during 1990-2016 worldwide.<sup>11</sup> Pharma  
58  
59  
60

1  
2  
3  
4  
5  
6 143 therefore adopted a new business model, the discovery and development of anticancer  
7  
8  
9 144 agents that could be sold at extremely high price, but usually for short treatment  
10  
11  
12 145 durations.<sup>5-7</sup> This guaranteed a hefty profit in a short timeframe - provided that the drugs  
13  
14  
15 146 would be prescribed and used - while imposing an extraordinarily high cost on patients  
16  
17  
18 147 and health systems.<sup>5-7 12</sup>  
19  
20  
21 148  
22  
23  
24 149 Physicians remain paramount decision-makers on the demand-side of the  
25  
26  
27 150 pharmaceutical market. It is known that even subtle financial interactions between  
28  
29  
30 151 physicians and a pharmaceutical company can affect their prescribing behavior,<sup>13-18</sup> and  
31  
32  
33 152 so could encourage irrational or preferential use of a company's drug. Perhaps  
34  
35  
36 153 unsurprisingly, given the cost of anticancer drugs, oncologists have latterly become  
37  
38  
39 154 primary targets for approaches from companies with high-cost anticancer products to  
40  
41  
42 155 sell. Indeed, significant financial relationships between such companies and the authors  
43  
44  
45 156 of the oncology Clinical Practice Guidelines (CPGs) have been reported both in the  
46  
47  
48 157 United States and Japan.<sup>19 20</sup> Given these far from ideal circumstances, there has been a  
49  
50  
51 158 growing need for intervention, in the form of policy implementation and education  
52  
53  
54 159 about the implications of these interactions, to help protect physicians, patients,  
55  
56  
57 160 institutions and the companies themselves.<sup>15-18</sup>  
58  
59  
60

1  
2  
3  
4  
5  
6  
7  
8  
9  
10  
11  
12  
13  
14  
15  
16  
17  
18  
19  
20  
21  
22  
23  
24  
25  
26  
27  
28  
29  
30  
31  
32  
33  
34  
35  
36  
37  
38  
39  
40  
41  
42  
43  
44  
45  
46  
47  
48  
49  
50  
51  
52  
53  
54  
55  
56  
57  
58  
59  
60  
161

162 Although Japan has the world's third largest pharmaceutical market, with annual sales  
163 of \$76 billion in 2017,<sup>21</sup> its overall scale has been declining at approximately 2%  
164 annually.<sup>22</sup> To maintain sales in these competitive and tightening markets, forceful  
165 advertisement of high-price products, namely novel oncology drugs, has become  
166 increasingly important for pharmaceutical companies. Indeed, sales of oncology drugs  
167 have recently been rising in Japan, exceeding ¥1 trillion [£6.8 billion, €8.0 billion, \$9.2  
168 billion] for the first time in 2016.<sup>23</sup> Furthermore, sales are predicted to increase 1.5–fold  
169 in the next decade with the increasing application of immunotherapy in clinical  
170 practice.<sup>23</sup> It would therefore be reasonable to assume that pharmaceutical companies  
171 will increasingly deploy marketing measures and incentives targeting oncology  
172 specialists for the immediate and foreseeable future.

173

174 In Japan, the JPMA encompasses a majority of companies that manufacture brand name  
175 drugs. Its members accounted for 80.8% of total pharmaceutical sales in Japan in  
176 2015.<sup>24</sup> In 2011, the JPMA published a transparency Guideline requiring all member  
177 companies to disclose all payments for speaking, writing and consulting made to all  
178 individuals, specifying their names and affiliations.<sup>25</sup> The Guideline was updated in

1  
2  
3  
4  
5  
6 179 2015 and made more comprehensive. The aim was to improve the transparency of  
7  
8  
9 180 linkages between pharmaceutical companies and physicians, as in the Open Payments  
10  
11  
12 181 Database in the United States.<sup>1 2</sup> The 2015 revised JPMA Guideline obliges Pharma to  
13  
14  
15 182 itemize payments made for 1) Research & Development; 2) Academic support; 3)  
16  
17  
18 183 Lecturing/writing/consultancy work; 4) Expenses related to provision of information  
19  
20  
21 184 and 5) Expenses for hospitality, etc. However, the disclosure format, whereby  
22  
23  
24 185 companies involved published the required data on their own individual websites, has  
25  
26  
27 186 differed among and between companies and the aggregated, standardized payment data  
28  
29  
30 187 have not been readily available.<sup>26</sup> As a result, an easy examination of  
31  
32  
33 188 company/physicians links and payments in a meaningful way has proved almost  
34  
35  
36 189 impossible.  
37  
38  
39 190  
40  
41  
42 191 The aims of the current study were: 1) to understand and evaluate the characteristics and  
43  
44  
45 192 distributions of financial payments made by pharmaceutical companies to oncology  
46  
47  
48 193 specialists: 2) to examine whether or not pharmaceutical companies may be making  
49  
50  
51 194 payments to help promote sales of their own products; and 3) to elucidate what Japanese  
52  
53  
54 195 oncology specialists are obliged to disclose with respect to any COI.  
55  
56  
57 196  
58  
59  
60

1  
2  
3  
4  
5  
6  
7  
8  
9  
10  
11  
12  
13  
14  
15  
16  
17  
18  
19  
20  
21  
22  
23  
24  
25  
26  
27  
28  
29  
30  
31  
32  
33  
34  
35  
36  
37  
38  
39  
40  
41  
42  
43  
44  
45  
46  
47  
48  
49  
50  
51  
52  
53  
54  
55  
56  
57  
58  
59  
60

197 **Methods**

198 *Study setting and participants*

199 The Japan Society of Medical Oncology (JSMO), with over 9154 general members, is  
200 the primary professional medical society in the clinical oncology field in Japan. The  
201 JSMO began operating a specialty registration system for members in 2004, which  
202 required JSMO members wishing to be certified to meet specific requirements for both  
203 oncology care and academic achievement. Only after passing the requisite examination,  
204 could they become board-certified oncology specialists, with renewal of certification  
205 being required every five years. All 1,081 oncology specialists certified by the JSMO as  
206 of April 1st, 2016, were included in this study.

207

208 *Sources of Payment Data*

209 The sources of the payment data were the websites of 78 pharmaceutical companies that  
210 were members of the JPMA in fiscal 2016. These companies were required to publish  
211 data of payments made to physicians and other researchers annually under the  
212 transparency guidelines of the JPMA. They were categorized into 71 active JPMA  
213 members, six affiliated entities of these companies, and one past member. The

1  
2  
3  
4  
5  
6 214 companies included in this study, plus their payment data, are listed in Supplementary  
7  
8  
9 215 Material 1.  
10  
11  
12 216  
13  
14  
15 217 We obtained each company's data and organized them into a unified, easy-to-compare  
16  
17  
18 218 database. This was done because no data was published as a spreadsheet. Consequently,  
19  
20  
21 219 data with differing character codes were converted into a spreadsheet format and data  
22  
23  
24 220 with no character codes were converted into text files using an Optical Character Reader.  
25  
26  
27 221 Moreover, where data was protected against facsimile or reproduction, we used  
28  
29  
30 222 FullShot10 software (Inbit, CA, USA) to scan photos of the data and converted the data  
31  
32  
33 223 into text files. The accuracy of the re-organized data was confirmed by comparing it  
34  
35  
36 224 with the original data. The database included physicians' names, their main institutional  
37  
38  
39 225 affiliation, payments received, the form of the payments, and the total amount paid. The  
40  
41  
42 226 form of payment was categorized into three types; payment for speaking engagements,  
43  
44  
45 227 payment for writing or publication work, and consulting fees. For the purposes of this  
46  
47  
48 228 study, we converted Japanese yen (¥) to Pounds Sterling (£), Euro (€), and US dollars  
49  
50  
51 229 (\$), using the average monthly exchange rate for 2016, namely ¥147.7 per £1, ¥124.5  
52  
53  
54 230 per €1 and ¥108.8 per US\$1.  
55  
56  
57 231  
58  
59  
60



1  
2  
3  
4  
5  
6 232 *Data collection*  
7

8  
9 233 We examined payment data for all oncology specialists included in this study. We  
10  
11  
12 234 extracted their working institutions and regional locations, along with the year of their  
13  
14  
15 235 certification by the JSMO. We further confirmed the accuracy of such information,  
16  
17  
18 236 collating data from institutional websites and other sources. We determined the sex of  
19  
20  
21 237 all the oncologists, using data from Japan's Ministry of Health, Labour and Welfare,<sup>27</sup>  
22  
23  
24 238 institutional websites and other sources. We further estimated the primary cancer  
25  
26  
27 239 specialty (respirology, gastroenterology, hematology, breast, etc.) of all oncologists  
28  
29  
30 240 included in the study. We also determined the COI policy of the JSMO prevailing at the  
31  
32  
33 241 time.  
34

35  
36 242  
37

38  
39 243 *Data analysis*  
40

41  
42  
43 244 To examine the characteristics and distributions of payments, we performed descriptive  
44  
45  
46 245 analyses of the data on an individual oncology specialist and pharmaceutical company  
47  
48  
49 246 basis. We then summarized the characteristics of oncology specialists according to the  
50  
51  
52 247 total monetary value of the payment they received, dividing the patients into the three  
53  
54  
55 248 groups; ¥1 million [£6,800, €8,000, \$9,200] or above (High-payment group (HPG)); ¥1  
56  
57  
58 249 – 1 million (Low-payment group (LPG)), and ¥0 (No-payment group (NPG)). In  
59  
60

1  
2  
3  
4  
5  
6 250 general, ¥1 million is approximately 25% of the median annual income of a Japanese  
7  
8  
9 251 citizen.<sup>28</sup>  
10  
11  
12  
13 252  
14  
15  
16 253 Using a multivariate negative binomial regression model, we subsequently examined  
17  
18  
19 254 possible factors associated with the monetary value of the payment to each individual,  
20  
21  
22 255 with sex, institutional place of work, regional working locations, year of experience  
23  
24  
25 256 after board certification, and cancer specialty as covariates. The payment data was  
26  
27  
28 257 rounded down as a unit of ¥1 million. Since the payment of those receiving less than ¥1  
29  
30  
31 258 million (Low-payment and No-payment Groups) was regarded as zero in the regression  
32  
33  
34 259 analysis, among this group we further examined possible factors associated with the  
35  
36  
37 260 monetary value of any payment using the same model adopted for the overall  
38  
39  
40 261 population. For this analysis, the payment data was rounded down as a unit of ¥100,000  
41  
42  
43 262 [£677, €803, \$919].  
44  
45  
46 263  
47  
48  
49  
50 264 For more detailed examination, a Sankey diagram was created to illustrate the  
51  
52  
53 265 distribution of payments to each cancer specialty on an individual company basis. The  
54  
55  
56 266 Sankey diagram is a flow diagram, where band width proportionally represents the flow  
57  
58  
59 267 quantity.<sup>29</sup> Payment values from individual companies, according to cancer specialty,  
60

1  
2  
3  
4  
5  
6 268 are depicted in the bands in the diagram, width being proportional to the total amount of  
7  
8  
9 269 the payment. In addition, to see whether the payment was linked to any specific  
10  
11  
12 270 oncology drugs, we examined such drugs with annual Japanese domestic sales of ¥5  
13  
14  
15 271 billion [£33.9 million, €40.2 million, \$46.0 million] or above (high revenue generating  
16  
17  
18 272 drugs) in fiscal 2016, and if each drug was covered under the Japanese National Health  
19  
20  
21 273 Insurance scheme in specific oncology subspecialty by the end of the same fiscal year  
22  
23  
24 274 (March 31, 2017). We further examined newly-approved drugs and drugs with a new  
25  
26  
27 275 indication added during the fiscal years of 2015 and 2016 (April 1, 2015 to March 31,  
28  
29  
30 276 2017).

31  
32  
33  
34 277

### 35 36 37 278 *Human subject involvement*

38  
39  
40 279 The present study is a retrospective analysis of existing databases and public domain  
41  
42  
43 280 information. No patients or any other individuals other than oncology specialists  
44  
45  
46 281 identified in the public domain, and whose names are not identified in this report, were  
47  
48  
49 282 included in the study.

50  
51  
52 283

## 53 54 55 284 **Results**

56  
57  
58  
59  
60

1  
2  
3  
4  
5  
6 285 The JSMO had over 9,000 members at the time the study was undertaken, with 1081  
7  
8  
9 286 physicians having been Board Certified as oncology specialists. We excluded one  
10  
11  
12 287 oncologist whose professional affiliation we were unable to confirm, and he did not  
13  
14  
15 288 receive any payment from the pharmaceutical companies. Thus, we included a total of  
16  
17  
18 289 1,080 specialist oncologists in our analyses.  
19  
20

21 290

22  
23  
24 291 Table 1 summarizes the details of certified oncologists and payments from Japanese  
25  
26  
27 292 pharmaceutical firms. Of the 1,080 individuals involved, 907 were men (84.0%) and  
28  
29  
30 293 173 (16.0%) were women. Of the total, 442 (40.9%), 183 (16.9%), and 455 (42.1%)  
31  
32  
33 294 worked for university hospitals, cancer hospitals, and other institutions, respectively. In  
34  
35  
36 295 2016, the most common specialty was respiratory (285, 26.4%), followed by  
37  
38  
39 296 gastroenterology (278, 25.7%) and hematology (250, 23.2%).  
40

41  
42 297

43  
44  
45 298 A total of 7,325 payments were recorded, the total monetary value being ¥585,453,314  
46  
47  
48 299 [£3,963,800, €4,702,436, \$5,381,005]. Of this total, ¥467,802,690 [£3,167,249,  
49  
50  
51 300 €3,757,451, \$4,299,657] was for speaking engagements, ¥94,682,807 [£641,048,  
52  
53  
54 301 €760,504, \$870,246] was for consulting services, and ¥22,266,186 [£150,753, €178,845,  
55  
56  
57 302 \$204,652] was paid for writing work. The median monetary value and count of an  
58  
59  
60

1  
2  
3  
4  
5  
6 303 individual payment was ¥120,016 [£813, €964, \$1,103]. (interquartile range (IQR) ¥ 0 –  
7  
8  
9 304 ¥449,378 [£3,043, €3,609, \$4,130] and 2 (IQR 0–7), respectively.  
10  
11  
12 305  
13  
14  
15 306 Of the 1,080 individuals, 763 (70.6%) received at least one payment. Furthermore, 142  
16  
17  
18 307 (13.1%) received payments totaling  $\geq$ ¥1 million, while 19 (1.8%) received  $\geq$ ¥5 million  
19  
20  
21 308 [£33,900, €40,200, \$46,000]. Two individuals (0.2%) received  $\geq$ ¥10 million [£67,700,  
22  
23  
24 309 €80,300, \$91,900].  
25  
26  
27 310  
28  
29  
30 311 Respiriology was the specialty which attracted the largest payment (¥216,806,522  
31  
32  
33 312 [£1,467,884, €1,741,418, \$1,992,707] from the pharmaceutical companies, followed by  
34  
35  
36 313 gastroenterology (¥139,690,202 [£945,770, €1,122,010, \$1,283,917.00] and  
37  
38  
39 314 hematology (¥119,219,713 [£807,175, €957,588, \$1,095,769]).  
40  
41  
42 315  
43  
44  
45 316 Table 2 summarizes the monetary values and counts of payments made by the 78  
46  
47  
48 317 pharmaceutical companies. In total, 59 (75.6%) companies made at least one payment to  
49  
50  
51 318 oncology specialists. The Chugai Pharmaceutical Co. Ltd., a subsidiary of F. Hoffmann-  
52  
53  
54 319 La Roche Ltd, made the largest accumulated payment of ¥103,830,493 [£702,982, €  
55  
56  
57 320 833,980, \$954,324]. The median monetary value and count among the 78 companies  
58  
59  
60

1  
2  
3  
4  
5  
6 321 was ¥645,946 [£4,373, €5,188, \$5,937] (IQR ¥33,410 [£226, €268, \$307] – ¥5,196,201  
7  
8  
9 322 [£35,181, €41,737, \$47,759] and 10 (IQR 1 – 71), respectively.  
10  
11  
12 323  
13  
14  
15 324 Table 3 ranks the oncology specialists according to the monetary value of the payments  
16  
17  
18 325 they received. In the HPG (N=142), females accounted for only 6.3% (9) of the total,  
19  
20  
21 326 while in the LPG (N=621), females accounted for 10.6% (66) of the total. However,  
22  
23  
24 327 females accounted for 30.9% (99) in the NPG (N=317). With respect to male recipients,  
25  
26  
27 328 75.9% (688/907) received at least one payment, compared to only 43.4% of females  
28  
29  
30 329 (75/173). Of the oncologists in the HPG, 52.8% (75) worked for university hospitals  
31  
32  
33 330 and 28.2% (40) worked for cancer hospitals: these figures were higher than those seen  
34  
35  
36 331 in the other two groups. Further, while only 19.7% (28) of the specialists in the HPG  
37  
38  
39 332 were certified during the previous five years (2012 to 2016), 49.4% (307) and 60.3%  
40  
41  
42 333 (191) of individuals in the LPG and NPG respectively were certified during these five  
43  
44  
45 334 years. The proportion of specialist respiratory oncologists was larger in the HPG (55,  
46  
47  
48 335 38.7%) than in either the LPG (165, 26.6%) or NPG (65, 20.5%).  
49  
50

51 336  
52  
53  
54  
55  
56  
57  
58  
59  
60

1  
2  
3  
4  
5  
6 337 In the HPG, the total monetary value paid and number of payments were ¥418,345,258  
7  
8  
9 338 [£2,832,398, €3,360,203, \$3,845,085] and 4,466, respectively, accounting for 71.5%  
10  
11  
12 339 and 61.0% of the totals.  
13  
14  
15 340  
16  
17  
18 341 Table 4 displays findings of the multivariate regression analyses for the monetary value  
19  
20  
21 342 of payments. Female oncologists tended to receive a smaller value of payments than  
22  
23  
24 343 their male counterparts (relative monetary value [RMV] 0.40, 95% CI 0.20 – 0.79).  
25  
26  
27 344 Oncologists working for university hospitals (RMV 5.78, 95% CI 3.34 – 10.02) and  
28  
29  
30 345 those working for cancer hospitals (RMV 5.47, 95% CI 3.30 – 9.06) also tended to  
31  
32  
33 346 receive higher payments. Oncologists with longer experience after board certification  
34  
35  
36 347 were significantly more likely to receive larger payments compared with those with  
37  
38  
39 348 shorter experience (RMV 1.40, 95% CI 1.30 – 1.50). Those working in hematology  
40  
41  
42 349 were likely to receive smaller payments than those working in respirology (RMV 0.49,  
43  
44  
45 350 95% CI 0.30 – 0.83). In the LPG and NPG, there were no significant differences in the  
46  
47  
48 351 monetary value of the payments with respect to the type of affiliation of recipients.  
49  
50  
51 352  
52  
53  
54 353 Figure 1 displays payment distributions to each cancer specialty on an individual  
55  
56  
57 354 company basis. Details of the payments are provided in Supplementary Material 2.  
58  
59  
60

1  
2  
3  
4  
5  
6  
7 355 Further, in Supplementary Material 3, we summarize the list of high revenue generating  
8  
9 356 oncology drugs. Chugai Pharmaceutical Co., Ltd. made the largest specialty payment of  
10  
11  
12 357 ¥ 103,830,493 [£702,982, €833,980, \$954,324] and the top four specialties were  
13  
14  
15 358 gastroenterology (¥34,760,717 [£235,347, €279,203, \$319,492], 33.5%), respirology  
16  
17  
18 359 (¥32,937,605 [£223,003, €264,559, \$302,735], 31.7%), hematology (¥17,702,450  
19  
20  
21 360 [£119,854, € 142,188, \$162,706], 17.0%), and breast cancer (¥10,548,519 [£71,419, €  
22  
23  
24 361 84,727, \$96,953], 12.0%). The Chugai company manufactured eight high revenue  
25  
26  
27 362 generating oncology drugs (Supplementary Material 3), and four, three, one, and five  
28  
29  
30 363 drugs were respectively covered under the National Health Insurance scheme for the  
31  
32  
33 364 field of gastroenterology, respirology, hematology and breast cancer. Nivolumab  
34  
35  
36 365 (Opdivo®), manufactured by the Ono Pharmaceutical Co., Ltd., mainly used in lung  
37  
38  
39 366 cancer and melanoma, had the largest domestic sales in 2016 (¥103.9 billion [£703.5  
40  
41  
42 367 million, €834.5 million, \$955.0 million]). The total monetary value of the company's  
43  
44  
45 368 payments was ¥47,831,737 [£323,844, €384,191, \$439,630], (representing fourth place  
46  
47  
48 369 in the payment table), of which ¥29,657,836 [£200,798, €238,216, \$272,590] (62.0%)  
49  
50  
51 370 was specifically distributed to respirology specialists. All of the top eight companies  
52  
53  
54 371 with regard to the monetary value of the payments (Supplementary Material 2) had at  
55  
56  
57 372 least one drug which was newly approved or that had an added anticancer indication  
58  
59  
60



1  
2  
3  
4  
5  
6 373 under the National Health Insurance scheme in the fiscal years of 2015 and 2016  
7  
8  
9 374 (Supplementary Material 4). While AstraZeneca Plc. had no high revenue generating  
10  
11  
12 375 oncology drugs (Supplementary Material 3), vandetanib (Caprelsa®) and osimertinib  
13  
14  
15 376 (Tagrisso®) were newly approved for thyroid cancer in September, 2015 and non-small  
16  
17  
18 377 cell lung cancer in March, 2016, respectively (Supplementary Material 4). The total  
19  
20  
21 378 monetary value of the company's payments was second, accounting for ¥51,928,785  
22  
23  
24 379 [£351,583, €417,099, \$477,287]. Of the total, 84.8% (¥44,013,864 [£297,995, €353,525,  
25  
26  
27 380 \$404,539]) was specifically allocated to oncologists with a specialism in respirology.  
28

29  
30 381

31  
32  
33 382 The JSMO has established a guideline on COI disclosure for its members which  
34  
35  
36 383 requires them to disclose any COI associated with publications and other research  
37  
38  
39 384 presentations. Further, Executive Board members, auditors, and other high-level  
40  
41  
42 385 members, as well as Presidents and Vice-Presidents of conferences and committee  
43  
44  
45 386 members operating under the JSMO are required to disclose any COI associated with  
46  
47  
48 387 their work and positions. These include, with respect to any for-profit organization,  
49  
50  
51 388 reporting any 1) position as an officer or advisor, 2) stock ownership, 3) patent royalties  
52  
53  
54 389 or licensing fees, 4) honoraria (e.g. lecture fees), 5) fees paid for any writing or  
55  
56  
57 390 publication work, 6) receipt of research funding, 7) advisory fees or financial  
58  
59  
60

1  
2  
3  
4  
5  
6 391 remuneration in exchange for testimony, 8) acceptance of researchers from any for-  
7  
8  
9 392 profit enterprise, 9) endowed chairs offered, and 10) any remuneration (travel, gifts, or  
10  
11  
12 393 other in-kind payments not directly related to research). However, there are no rules  
13  
14  
15 394 specifically referring to oncology specialists.  
16  
17

395

## 396 **Discussion**

397 In 2016, approximately ¥600 million [£4.1 million, €4.8 million, \$5.5 million] was paid  
398 by Japanese pharmaceutical companies to 763 (70.6%) certified oncology specialists.  
399 Payments appeared to be concentrated on specific targets, notably experienced male  
400 oncologists working for university hospitals and cancer hospitals.

401

402 The proportion of oncologists receiving payments was larger compared with general  
403 physicians in the US (48.0%)<sup>30</sup> and Japan (33.3%).<sup>31</sup> However, the proportion was  
404 slightly smaller than that of NCCN oncology CPG authors in the US (86.4%).<sup>19</sup>

405 Although the mean value of payments in our study was approximately half of that of the  
406 CPG authors (\$4,982 [data not shown] vs.\$10,011), a simple comparison is not valid, as  
407 our analysis only covered data for speaking, writing and consultancy work. It did not  
408 include payments related to meals, transportation and accommodation, stock ownership,

1  
2  
3  
4  
5  
6 409 investment interest, or payments from medical device companies, as is compiled in the  
7  
8  
9 410 US's Open Payments database.<sup>30</sup> The CPG authors strongly influence oncology practice,  
10  
11  
12 411 both in the US and internationally,<sup>32</sup> by recommending treatment algorithms. They may  
13  
14  
15 412 well be identified as prime targets for representatives of Pharma attempting to promote  
16  
17  
18 413 the sale of their anticancer products. It is thus reasonable to assume that Japanese  
19  
20  
21 414 Pharma with similar anticancer interests may well be trying to target oncology  
22  
23  
24 415 specialists in an attempt to help boost the sales and use of their specific products.  
25  
26  
27 416  
28  
29  
30 417 We observed a large disparity in payments to specialists. Those receiving ¥1 million or  
31  
32  
33 418 more accounted for 13.1% of all oncologists studied but received 71.5% of the total  
34  
35  
36 419 paid. Oncologists working for university hospitals and those working for cancer  
37  
38  
39 420 hospitals similarly received large value payments. In Japan, cancer centers are generally  
40  
41  
42 421 more likely to treat more cancer patients compared to university hospitals. Indeed,  
43  
44  
45 422 cancer centers top the nationwide ratings for treatments of most of the common cancers,  
46  
47  
48 423 including lung, colon, gastric, and breast cancer.<sup>33</sup> In contrast, university hospitals are  
49  
50  
51 424 regarded as symbols of academic excellence and authority, and medical school  
52  
53  
54 425 professors traditionally have a strong influence on both physicians and medical practice  
55  
56  
57 426 in their field of expertise. They are more influential in setting treatment protocols which  
58  
59  
60

1  
2  
3  
4  
5  
6 427 are usually followed without question by less senior medical staff nationwide. Thus, our  
7  
8  
9 428 findings suggest that Japanese pharmaceutical companies have placed emphasis on  
10  
11  
12 429 expertise and authority, as well as clinical experience, in the selection of targets for their  
13  
14  
15 430 promotional activities.  
16

17  
18 431

19  
20  
21 432 A particularly significant finding was that a smaller proportion of female oncologists  
22  
23  
24 433 received payments from Pharma compared to their male colleagues. Furthermore,  
25  
26  
27 434 women also tended to receive smaller payment amounts than men. These findings are in  
28  
29  
30 435 line with similar studies performed in the US.<sup>34 35</sup> In the relatively unique, patriarchal  
31  
32  
33 436 Japanese society, there may be very specific reasons for these results. Firstly, there are  
34  
35  
36 437 far fewer female oncologists than males and they have considerably less spare time for  
37  
38  
39 438 industry-related work due to women needing to fulfill their socially-perceived duty to  
40  
41  
42 439 be the main person responsible for raising any children in the family.<sup>36</sup> Further, Pharma  
43  
44  
45 440 may tend to target men rather than women<sup>34</sup> because in Japan's male-dominated society,  
46  
47  
48 441 the status of women has traditionally been low, and their contribution, presence and  
49  
50  
51 442 influence in biomedicine and the higher echelons of power and influence has not been  
52  
53  
54 443 actively encouraged.<sup>37 38</sup>  
55

56  
57 444  
58  
59  
60

1  
2  
3  
4  
5  
6 445 We found that respirology attracted the greatest financial outlay. In Japan, lung cancer  
7  
8  
9 446 is of primary concern at present, covering a large patient volume and consequently  
10  
11  
12 447 attracting multiple novel oncology drugs, such as alectinib (Alecensa®) (Chugai  
13  
14  
15 448 Pharmaceutical Co., Ltd., [approved 2014]), nivolumab (Opdivo®) (Ono  
16  
17  
18 449 Pharmaceutical Co., Ltd, [approved 2015]), afatinib (Gilotrif®) (Nippon Boehringer  
19  
20  
21 450 Ingelheim Co., Ltd., [approved 2016]), ceritinib (Zykadia®) (Novartis Pharma K.K.,  
22  
23  
24 451 [approved 2016]), osimertinib (Tagrisso®) (AstraZeneca plc, [approved 2016]),  
25  
26  
27 452 pembrolizumab (Keytruda®) (MSD K.K., [approved 2016]), ramucirumab  
28  
29  
30 453 (Cyramza®) (Eli Lilly Japan K.K., [approved 2016]), all for non-small cell lung cancer  
31  
32  
33 454 (Supplementary Materials 3 & 4). As such, for the pharmaceutical companies, this field  
34  
35  
36 455 is a critical yet highly competitive target in any strategy to maximize the cost-  
37  
38  
39 456 effectiveness of their promotional endeavors.  
40  
41  
42 457  
43  
44  
45 458 The examples of Chugai Pharmaceutical and Ono Pharmaceutical chiefly support the  
46  
47  
48 459 belief that there is an association between the value and destination of payments  
49  
50  
51 460 dependent on the products the companies in question manufacture. In contrast, the  
52  
53  
54 461 example of AstraZeneca adds credence to the notion that that funds were mainly  
55  
56  
57 462 allocated to promote their novel product: osimertinib (Tagrisso®) was approved for  
58  
59  
60

1  
2  
3  
4  
5  
6 463 non-small cell lung cancer in March 2016. Indeed, 84.8% of the company's total  
7  
8  
9 464 payment was allocated to respiratory specialists.  
10  
11  
12 465  
13  
14  
15 466 As we have demonstrated, there are extensive financial relationships between  
16  
17  
18 467 pharmaceutical companies and oncologists in Japan. It is true that the receipt of  
19  
20  
21 468 payments by physicians in Japan is not illegal, especially as they are supposedly given  
22  
23  
24 469 as remuneration for work undertaken or services rendered. However, we believe that  
25  
26  
27 470 there is an ethical problem inherent in such relationships, given that this practice can be  
28  
29  
30 471 seen by the public and neutral observers as being instigated and developed to possibly  
31  
32  
33 472 end up expanding the profit of pharmaceutical companies, rather than promoting the  
34  
35  
36 473 health and well-being of patients. Indeed, even a subtle but reputable financial  
37  
38  
39 474 relationship with the industry, such as collaborating in a field trial, could bias a  
40  
41  
42 475 physician's prescription patterns in a manner that benefits the companies.<sup>13-18</sup>  
43  
44  
45 476 Oncologists handle extraordinary and very potent life-saving drugs, and have a degree  
46  
47  
48 477 of autonomy in their prescribing actions. Their decisions substantially influence the  
49  
50  
51 478 treatment and outcome for their patients, as well as having significant economic impact  
52  
53  
54 479 due to the high cost of anticancer medications.<sup>5-7</sup> It would therefore appear sensible to  
55  
56  
57 480 have regulations in place which necessitate the open and accessible reporting of any  
58  
59  
60

1  
2  
3  
4  
5  
6 481 financial dealings between physicians and Pharma, so as to avoid any potential  
7  
8  
9 482 nefarious or underhand behavior or undue pressure on physicians to alter their usual  
10  
11  
12 483 treatment practices. Indeed, it is possible that these arrangements may have contributed  
13  
14  
15 484 to the multiple cases of scientific misconduct that have recently been reported in Japan.  
16  
17  
18 485 The most infamous case was when employee misconduct was discovered in a series of  
19  
20  
21 486 clinical trials for Valsartan, an antihypertensive medication manufactured by Novartis  
22  
23  
24 487 Pharma KK, leading to a retraction of the associated academic papers.<sup>39 40</sup> Also, the  
25  
26  
27 488 company illegally (or unethically) obtained the information about patients participating  
28  
29  
30 489 in another clinical trial for chronic myelogenous leukemia using nilotinib (Tasigna®)  
31  
32  
33 490 from a university hospital in Japan.<sup>41 42</sup> A breast cancer clinical trial (CREATE-X trial)  
34  
35  
36 491 with a questionable pharmaceutical payment has also been identified.<sup>43 44</sup>  
37  
38  
39 492  
40  
41  
42 493 Since January, the new regulations in Japan have already been weakened by allowing  
43  
44  
45 494 Pharma to aggregate payment data they should publish into a single amount, making  
46  
47  
48 495 matters much less transparent.<sup>45</sup> To prevent similar cases in future, we call for the  
49  
50  
51 496 implementation of a transparent, independent mechanism that would enable a  
52  
53  
54 497 comprehensive assessment of any and all payments being made by any pharmaceutical  
55  
56  
57 498 company to any individual physician or, for that matter, medical institution where the  
58  
59  
60

1  
2  
3  
4  
5  
6 499 company's products may be used - and not just with respect to oncology. Ideally, these  
7  
8  
9 500 actions should be mandatory and legally-binding on the side of both the company and  
10  
11  
12 501 physician. New schemes along these lines, such as the US's Open Payments Database,  
13  
14  
15 502 may prove successful but it is too soon to know.<sup>46</sup> The Disclosure UK mechanism may  
16  
17  
18 503 not prove to be so effective as it is voluntary.<sup>47</sup> Additionally, given that such  
19  
20  
21 504 mechanisms allow for direct comparison between what is allegedly paid and what is  
22  
23  
24 505 allegedly received, any new system will probably necessitate a fair, equitable and timely  
25  
26  
27 506 mechanism for dispute settlement, probably involving the use of third parties.<sup>44</sup>  
28  
29

30 507

### 31 508 **Study Limitations**

32  
33  
34  
35  
36 509 Several limitations in this preliminary study should be acknowledged. First, there could  
37  
38  
39 510 be measurement errors in the affiliations and subspecialties of the included specialists,  
40  
41  
42 511 as we collated these data in the study year (2016), using the websites and other data  
43  
44  
45 512 sources on the Internet. Second, there might be minor measurement errors in the  
46  
47  
48 513 payment database as well. Most of the pharmaceutical companies involved did not  
49  
50  
51 514 disclose their payment data in a uniform or readily available format. As a result, we  
52  
53  
54 515 manually entered all the payment data from a variety of formats, and, despite repeated  
55  
56  
57 516 and careful review, the database may include minor errors. Third, the present research  
58  
59  
60



1  
2  
3  
4  
5  
6 517 analyzed only limited payment types, namely speaking, writing and consultancy work.  
7  
8  
9 518 Currently, Japanese pharmaceutical companies do not disclose any payment data for  
10  
11  
12 519 stock holdings, royalties, individual data for costs of meals, transportation and  
13  
14  
15 520 accommodation, etc. As, unlike the pharmaceutical companies, the JMSO and other  
16  
17  
18 521 similar academic and learned societies in Japan, where such data may be registered,  
19  
20  
21 522 refuse to open their databases on payments to public scrutiny, we were not able to  
22  
23  
24 523 consider these data in this study. Fourth, most of the pharmaceutical companies only  
25  
26  
27 524 publish single year data so we could only consider payments made in fiscal 2016. To  
28  
29  
30 525 understand temporal trends and the extent and distribution of pharmaceutical company  
31  
32  
33 526 payments, a continuous assessment of the payment data is warranted in future.  
34  
35

36 527

37  
38  
39 528 **Concluding remarks**

40  
41  
42 529 Japanese certified oncologists receive financial payments directly from pharmaceutical  
43  
44  
45 530 companies, usually from companies active in the specialist field of the physician in  
46  
47  
48 531 question. In today's prevailing climate of Fake News, inaccurate scientific data,  
49  
50  
51 532 Vaccine Hesitancy, and suspicion about many financial dealings involving Pharma, this  
52  
53  
54 533 raises several queries with regard to ethical, medical, and legal issues. The value and  
55  
56  
57 534 specialty targets of the payments varied substantially, which also raises yet more  
58  
59  
60

1  
2  
3  
4  
5  
6 535 questions as to why. We believe that the lessons learned from our analyses should be  
7  
8  
9 536 shared among the global medical community to help put in place safeguards to prevent  
10  
11  
12 537 any form of inducements from the pharmaceutical industry and to help protect  
13  
14  
15 538 physicians from outside influences. It is essential to establish a robust, comprehensive  
16  
17  
18 539 and legally-binding system for identifying and avoiding any and all potential COIs, of  
19  
20  
21 540 any nature, involving physicians or other medical professionals, both in Japan and  
22  
23  
24 541 internationally. While it is too early to evaluate whether similar systems, such as the  
25  
26  
27 542 US-based Open Payments Database, will be truly effective, financial transparency is a  
28  
29  
30 543 fundamental component in illustrating that there is an open, honest and ethically correct  
31  
32  
33 544 relationship between pharmaceutical companies and physicians. A more comprehensive  
34  
35  
36 545 study is planned, to include all Japanese oncologists, to try and confirm our findings and  
37  
38  
39 546 to help identify the best way forward to ensure that COIs are minimized and so that  
40  
41  
42 547 physicians and pharmaceutical companies can work harmoniously and synergistically to  
43  
44  
45 548 provide Japan with the best cancer prophylaxis, treatment and cures possible.  
46  
47

48 549

51 **Ethics approval**

52  
53  
54 551 This study was approved by the Institutional Review Board of the Medical Governance  
55  
56  
57 552 Research Institute (MEGRI) on 16th May 2018.  
58  
59  
60

1  
2  
3  
4  
5  
6  
7  
8  
9  
10  
11  
12  
13  
14  
15  
16  
17  
18  
19  
20  
21  
22  
23  
24  
25  
26  
27  
28  
29  
30  
31  
32  
33  
34  
35  
36  
37  
38  
39  
40  
41  
42  
43  
44  
45  
46  
47  
48  
49  
50  
51  
52  
53  
54  
55  
56  
57  
58  
59  
60

553

554 **Author contributors**

555 AO acquired and controlled all sources of data, and oversaw all data analyses.

556 AO, HS, YO, TS, YShim, YSom, AT, and TT were involved in the study concept and  
557 design.

558 AO, HS, YO, TS, YShim, YSom, AT, and TT were involved in the analysis,  
559 interpretation of results and formation of conclusions.

560 A.O. drafted the manuscript.

561

562 **Funding statement**

563 The Medical Governance Research Institute (MEGRI) is a nonprofit enterprise, which  
564 receives donations from various organizations and individuals. Among the donors, Ain  
565 Pharmaciez Inc. is part of the pharmaceutical industry. Waseda Chronicle, an  
566 independent non-profit news organization dedicated to investigative journalism, also  
567 contributed funding to this study. The funders made no contribution whatsoever to  
568 either the design of the study, the work carried out or the interpretation of the study  
569 findings.

570

1  
2  
3  
4  
5  
6  
7  
8  
9  
10  
11  
12  
13  
14  
15  
16  
17  
18  
19  
20  
21  
22  
23  
24  
25  
26  
27  
28  
29  
30  
31  
32  
33  
34  
35  
36  
37  
38  
39  
40  
41  
42  
43  
44  
45  
46  
47  
48  
49  
50  
51  
52  
53  
54  
55  
56  
57  
58  
59  
60

571 **Role of funding source**

572 Financial supporters of this research project - Ain Pharmaciez Inc. and Waseda

573 Chronicle - made no contribution whatsoever to either the design of the study, the work  
574 carried out or the interpretation of the study findings.

575

576 **Conflict of Interest statement**

577 AO and TT receive personal fees from Medical Network Systems (MNES Inc.); HS has  
578 received a research honorarium from TAIHO Pharmaceutical Co., Ltd. All other authors  
579 declare no conflict of interests.

580

581 **Acknowledgements**

582 The authors thank Dr Masahiro Kami and Professor Andy Crump for their constructive  
583 opinions and insights and the Waseda Chronicle for extensive support.

584

585 **Data availability statement**

586 The datasets analyzed during the current study are available from the corresponding  
587 author on reasonable request.

588

589

For peer review only

1  
2  
3  
4  
5  
6  
7  
8  
9  
10  
11  
12  
13  
14  
15  
16  
17  
18  
19  
20  
21  
22  
23  
24  
25  
26  
27  
28  
29  
30  
31  
32  
33  
34  
35  
36  
37  
38  
39  
40  
41  
42  
43  
44  
45  
46  
47  
48  
49  
50  
51  
52  
53  
54  
55  
56  
57  
58  
59  
60

1  
2  
3  
4  
5  
6 **590 Figure legends**  
7

8  
9 **591 Figure 1.** Distribution of payments to each subspecialty on an individual company basis.  
10

11  
12 **592** The companies and specialties are sorted in descending order with regard to payment  
13

14  
15 **593** value (proportionally expressed in the box height and band width in Figure 1). Band  
16

17  
18 **594** color represents the payment destination specialties. Due to space limitations, names of  
19

20  
21 **595** companies with payment values of less than ¥10 million (£67,700, €80,300, \$91,900)  
22

23  
24 **596** have been omitted.  
25

26  
27 **597**  
28

29  
30 **598**  
31  
32  
33  
34  
35  
36  
37  
38  
39  
40  
41  
42  
43  
44  
45  
46  
47  
48  
49  
50  
51  
52  
53  
54  
55  
56  
57  
58  
59  
60

**References**

- 599  
600  
601 1. Agrawal S, Brown D. The Physician Payments Sunshine Act--Two Years of the  
602 Open Payments Program. *N Engl J Med* 2016;374(10):906-9. doi:  
603 10.1056/NEJMp1509103
- 604 2. Agrawal S, Brennan N, Budetti P. The Sunshine Act--effects on physicians. *N Engl J*  
605 *Med* 2013;368(22):2054-7. doi: 10.1056/NEJMp1303523
- 606 3. Cancer Information Service NCC, Japan. Cancer registry and statistics. 2018.  
607 Available from: [https://ganjoho.jp/reg\\_stat/statistics/stat/index.html](https://ganjoho.jp/reg_stat/statistics/stat/index.html).
- 608 4. Jemal A, Vinela P, Bray F, et al. The Cancer Atlas, 2nd Edition. GA: American  
609 Cancer Society 2014.
- 610 5. Experts in Chronic Myeloid Leukemia. The price of drugs for chronic myeloid  
611 leukemia (CML) is a reflection of the unsustainable prices of cancer drugs: from the  
612 perspective of a large group of CML experts. *Blood* 2013;121(22):4439-42. doi:  
613 10.1182/blood-2013-03-490003
- 614 6. Light DW, Kantarjian H. Market spiral pricing of cancer drugs. *Cancer*  
615 2013;119(22):3900-2. doi: 10.1002/cncr.28321

- 1  
2  
3  
4  
5  
6 616 7. Kantarjian H, Rajkumar SV. Why are cancer drugs so expensive in the United States,  
7  
8  
9 617 and what are the solutions? *Mayo Clin Proc* 2015;90(4):500-4. doi:  
10  
11  
12 618 10.1016/j.mayocp.2015.01.014  
13  
14  
15 619 8. Odell TW, Gregory MC. Cost of hypertension treatment. *J Gen Intern Med*  
16  
17  
18 620 1995;10(12):686-8.  
19  
20  
21 621 9. Tibi-Levy Y, de Pouvourville G, Westerloppe J, et al. The cost of treating high blood  
22  
23  
24 622 pressure in general practice in France. *Eur J Health Econ* 2008;9(3):229-36. doi:  
25  
26  
27 623 10.1007/s10198-007-0065-2  
28  
29  
30 624 10. Zhuo X, Zhang P, Kahn HS, et al. Change in medical spending attributable to  
31  
32  
33 625 diabetes: national data from 1987 to 2011. *Diabetes Care* 2015;38(4):581-7. doi:  
34  
35  
36 626 10.2337/dc14-1687  
37  
38  
39 627 11. Global Burden of Disease Cancer C, Fitzmaurice C, Akinyemiju TF, et al. Global,  
40  
41  
42 628 Regional, and National Cancer Incidence, Mortality, Years of Life Lost, Years Lived  
43  
44  
45 629 With Disability, and Disability-Adjusted Life-Years for 29 Cancer Groups, 1990 to  
46  
47  
48 630 2016: A Systematic Analysis for the Global Burden of Disease Study. *JAMA Oncol*  
49  
50  
51 631 2018;4(11):1553-68. doi: 10.1001/jamaoncol.2018.2706  
52  
53  
54 632 12. Zafar SY, Peppercorn JM, Schrag D, et al. The financial toxicity of cancer  
55  
56  
57 633 treatment: a pilot study assessing out-of-pocket expenses and the insured cancer  
58  
59  
60



- 1  
2  
3  
4  
5  
6 634 patient's experience. *Oncologist* 2013;18(4):381-90. doi: 10.1634/theoncologist.2012-  
7  
8  
9 635 0279  
10  
11  
12 636 13. DeJong C, Aguilar T, Tseng CW, et al. Pharmaceutical Industry-Sponsored Meals  
13  
14  
15 637 and Physician Prescribing Patterns for Medicare Beneficiaries. *JAMA Intern Med*  
16  
17  
18 638 2016;176(8):1114-22. doi: 10.1001/jamainternmed.2016.2765  
19  
20  
21 639 14. De Ferrari A, Gentile C, Davalos L, et al. Attitudes and relationship between  
22  
23  
24 640 physicians and the pharmaceutical industry in a public general hospital in Lima, Peru.  
25  
26  
27 641 *PLoS One* 2014;9(6):e100114. doi: 10.1371/journal.pone.0100114  
28  
29  
30 642 15. Fickweiler F, Fickweiler W, Urbach E. Interactions between physicians and the  
31  
32  
33 643 pharmaceutical industry generally and sales representatives specifically and their  
34  
35  
36 644 association with physicians' attitudes and prescribing habits: a systematic review. *BMJ*  
37  
38  
39 645 *Open* 2017;7(9):e016408. doi: 10.1136/bmjopen-2017-016408  
40  
41  
42 646 16. Riese F, Guloksuz S, Roventa C, et al. Pharmaceutical industry interactions of  
43  
44  
45 647 psychiatric trainees from 20 European countries. *Eur Psychiatry* 2015;30(2):284-90.  
46  
47  
48 648 doi: 10.1016/j.eurpsy.2014.09.417  
49  
50  
51 649 17. Lee D, Begley CE. Physician report of industry gifts and quality of care. *Health*  
52  
53  
54 650 *Care Manage Rev* 2016;41(3):275-83. doi: 10.1097/HMR.0000000000000042  
55  
56  
57  
58  
59  
60

- 1  
2  
3  
4  
5  
6 651 18. Montastruc F, Moulis G, Palmaro A, et al. Interactions between medical residents  
7  
8  
9 652 and drug companies: a national survey after the Mediator(R) affair. *PLoS One*  
10  
11  
12 653 2014;9(10):e104828. doi: 10.1371/journal.pone.0104828  
13  
14  
15 654 19. Mitchell AP, Basch EM, Dusetzina SB. Financial Relationships With Industry  
16  
17  
18 655 Among National Comprehensive Cancer Network Guideline Authors. *JAMA Oncol*  
19  
20  
21 656 2016;2(12):1628-31. doi: 10.1001/jamaoncol.2016.2710  
22  
23  
24 657 20. Saito H, Ozaki A, Sawano T, et al. Evaluation of Pharmaceutical Company  
25  
26  
27 658 Payments and Conflict of Interest Disclosures Among Oncology Clinical Practice  
28  
29  
30 659 Guideline Authors in Japan. *JAMA Netw Open* 2019;2(4):e192834. doi:  
31  
32  
33 660 10.1001/jamanetworkopen.2019.2834  
34  
35  
36 661 21. IQVIA. Top 10 Pharmaceutical Markets Worldwide, 2017. 2017. Available from:  
37  
38  
39 662 [https://www.iqvia.com/-/media/iqvia/pdfs/canada-location-](https://www.iqvia.com/-/media/iqvia/pdfs/canada-location-site/top10worldwidesales_en_17.pdf?la=en&hash=C1D59CB0CB2B060CF458F14CF5390D96F3B28238)  
40  
41  
42 663 [site/top10worldwidesales\\_en\\_17.pdf?la=en&hash=C1D59CB0CB2B060CF458F14CF5](https://www.iqvia.com/-/media/iqvia/pdfs/canada-location-site/top10worldwidesales_en_17.pdf?la=en&hash=C1D59CB0CB2B060CF458F14CF5390D96F3B28238)  
43  
44  
45 664 [390D96F3B28238](https://www.iqvia.com/-/media/iqvia/pdfs/canada-location-site/top10worldwidesales_en_17.pdf?la=en&hash=C1D59CB0CB2B060CF458F14CF5390D96F3B28238). accessed July 12 2019.  
46  
47  
48 665 22. QuintilesIMS. Top 10 Pharmaceutical Markets Worldwide, 2016. 2016. Available  
49  
50  
51 666 from: [https://www.iqvia.com/-/media/iqvia/pdfs/canada-location-site/top-10-worldwide-](https://www.iqvia.com/-/media/iqvia/pdfs/canada-location-site/top-10-worldwide-sales-en-2016.pdf)  
52  
53  
54 667 [sales-en-2016.pdf](https://www.iqvia.com/-/media/iqvia/pdfs/canada-location-site/top-10-worldwide-sales-en-2016.pdf). accessed 2019 July 12.  
55  
56  
57  
58  
59  
60

- 1  
2  
3  
4  
5  
6  
7 668 23. Mix Online. Analysis of markets for oncology drugs in Japan. Available from:  
8  
9 669 <https://www.mixonline.jp/Article/tabid/55/artid/59063/Default.aspx>. accessed 16  
10  
11  
12 670 October 2018.
- 13  
14  
15 671 24. Japan Pharmaceutical Manufactures Association. Data book 2018 [in Japanese].  
16  
17  
18 672 2018. Available from: <http://www.jpma.or.jp/about/issue/gratis/databook/2018/>.  
19  
20  
21 673 accessed July 12 2019.
- 22  
23  
24 674 25. Japan Pharmaceutical Manufactures Association. Regarding the Transparency  
25  
26  
27 675 Guideline for the Relation between Corporate Activities and Medical Institutions. 2018.  
28  
29  
30 676 Available from:  
31  
32  
33 677 [http://www.jpma.or.jp/english/policies\\_guidelines/pdf/transparency\\_gl\\_intro\\_2018.pdf](http://www.jpma.or.jp/english/policies_guidelines/pdf/transparency_gl_intro_2018.pdf).  
34  
35  
36 678 accessed July 12 2019.
- 37  
38  
39 679 26. Saito H, Ozaki A, Kobayashi Y, et al. Pharmaceutical Company Payments to  
40  
41  
42 680 Executive Board Members of Professional Medical Associations in Japan. *JAMA Intern*  
43  
44  
45 681 *Med* 2019 doi: 10.1001/jamainternmed.2018.7283
- 46  
47  
48 682 27. Ministry of Health, Labour and Welfare. Physician Search Site [in Japanese]. 2019.  
49  
50  
51 683 Available from: [https://licenseif.mhlw.go.jp/search\\_isei/jsp/top.jsp](https://licenseif.mhlw.go.jp/search_isei/jsp/top.jsp). accessed 12 July  
52  
53  
54 684 2019.
- 55  
56  
57  
58  
59  
60

- 1  
2  
3  
4  
5  
6 685 28. National Tax Agency of Japan. Survey results of wages in 2013 (Japanese only).  
7  
8  
9 686 Available from:  
10  
11  
12 687 <https://www.nta.go.jp/information/release/kokuzeicho/2013/minkan/index.htm>.  
13  
14  
15 688 accessed 8 July 2018.  
16  
17  
18 689 29. Riehm P, Hanfler M, Froehlich B. Interactive Sankey diagrams. Information  
19  
20  
21 690 Visualization, 2005 INFOVIS 2005 IEEE Symposium 2005:233-40.  
22  
23  
24 691 30. Marshall DC, Jackson ME, Hattangadi-Gluth JA. Disclosure of Industry Payments  
25  
26  
27 692 to Physicians: An Epidemiologic Analysis of Early Data From the Open Payments  
28  
29  
30 693 Program. *Mayo Clin Proc* 2016;91(1):84-96. doi: 10.1016/j.mayocp.2015.10.016  
31  
32  
33 694 31. Waseda Chronicle. Pharmaceutical payment and physicians. 2018. Available from:  
34  
35  
36 695 <http://www.wasedachronicle.org/articles/docyens/e2/>. accessed 16 October 2018.  
37  
38  
39 696 32. Ismaila N, Salako O, Mutiu J, et al. Oncology Guidelines Usage in a Low- and  
40  
41  
42 697 Middle-Income Country. *J Glob Oncol* 2018(4):1-6. doi: 10.1200/JGO.17.00136  
43  
44  
45 698 33. Sony Life Insurance Co. L. Operation counts of cancer in Japanese hospitals [in  
46  
47  
48 699 Japanese]. 2018. Available from:  
49  
50  
51 700 <https://cs.sonylife.co.jp/lpv/pcms/sca/ct/medical/ranking-cancer/02.html?lpk=>. accessed  
52  
53  
54 701 16 October 2018.  
55  
56  
57  
58  
59  
60

- 1  
2  
3  
4  
5  
6 702 34. Tringale KR, Hattangadi-Gluth JA. Types and Distributions of Biomedical Industry  
7  
8  
9 703 Payments to Men and Women Physicians by Specialty, 2015. *JAMA Intern Med*  
10  
11  
12 704 2018;178(3):421-23. doi: 10.1001/jamainternmed.2017.7445  
13  
14  
15 705 35. Tringale KR, Marshall D, Mackey TK, et al. Types and Distribution of Payments  
16  
17  
18 706 From Industry to Physicians in 2015. *JAMA* 2017;317(17):1774-84. doi:  
19  
20  
21 707 10.1001/jama.2017.3091  
22  
23  
24 708 36. Ly DP, Seabury SA, Jena AB. Hours Worked Among US Dual Physician Couples  
25  
26  
27 709 With Children, 2000 to 2015. *JAMA Intern Med* 2017;177(10):1524-25. doi:  
28  
29  
30 710 10.1001/jamainternmed.2017.3437  
31  
32  
33 711 37. Shibayama S, Geuna A. Gender Gap in Science in Japan. 2016. Available from:  
34  
35  
36 712 <http://www.pp.u-tokyo.ac.jp/wp-content/uploads/2016/02/GraSPP-DP-E-16-001.pdf>.  
37  
38  
39 713 accessed 8 October 2018.  
40  
41  
42 714 38. Oshima K, Ozaki A, Mori J, et al. Entrance examination misogyny in Japanese  
43  
44  
45 715 medical schools. *Lancet* 2019;393(10179):1416. doi: 10.1016/S0140-6736(18)33180-5  
46  
47  
48 716 39. Lancet, Editors. Retraction--Valsartan in a Japanese population with hypertension  
49  
50  
51 717 and other cardiovascular disease (Jikei Heart Study): a randomised, open-label, blinded  
52  
53  
54 718 endpoint morbidity-mortality study. *Lancet* 2013;382(9895):843. doi: 10.1016/S0140-  
55  
56  
57 719 6736(13)61847-4  
58  
59  
60

- 1  
2  
3  
4  
5  
6 720 40. Narumi H, Takano H, Shindo S, et al. Retraction: Effects of valsartan and  
7  
8  
9 721 amlodipine on cardiorenal protection in Japanese hypertensive patients: the Valsartan  
10  
11  
12 722 Amlodipine Randomized Trial. *Hypertens Res* 2017;40(1):103. doi:  
13  
14  
15 723 10.1038/hr.2016.144  
16  
17  
18 724 41. Tanimoto T, Kami M, Shibuya K. Misconduct: Japan to learn from biomedical  
19  
20  
21 725 cases. *Nature* 2014;512(7515):371. doi: 10.1038/512371d  
22  
23  
24 726 42. McCurry J. Former Novartis employee arrested over valsartan data. *Lancet*  
25  
26  
27 727 2014;383(9935):2111. doi: 10.1016/s0140-6736(14)61015-1  
28  
29  
30 728 43. Ozaki A. Conflict of Interest and the CREATE-X Trial in the New England Journal  
31  
32  
33 729 of Medicine. *Sci Eng Ethics* 2017 doi: 10.1007/s11948-017-9966-3  
34  
35  
36 730 44. Ozaki A, Takita M, Tanimoto T. A call for improved transparency in financial  
37  
38  
39 731 aspects of clinical trials: a case study of the CREATE-X trial in the New England  
40  
41  
42 732 Journal of Medicine. *Invest New Drugs* 2018;36(3):517-22. doi: 10.1007/s10637-018-  
43  
44  
45 733 0577-x  
46  
47  
48 734 45. Kobashi Y, Watanabe M, Kimura H, et al. Are pharmaceutical company payments  
49  
50  
51 735 incentivising malpractice in Japanese physicians? *Int J Health Policy Manag* 2019  
52  
53  
54 736 46. Centers for Medicare & Medicaid. OpenPaymentData.CMS.gov. 2014. Available  
55  
56  
57 737 from: <https://openpaymentsdata.cms.gov/>. accessed 17 September 2018.  
58  
59  
60

- 1  
2  
3  
4  
5  
6 738 47. Mulinari S, Ozieranski P. Disclosure of payments by pharmaceutical companies to  
7  
8  
9 739 healthcare professionals in the UK: analysis of the Association of the British  
10  
11  
12 740 Pharmaceutical Industry's Disclosure UK database, 2015 and 2016 cohorts. *BMJ Open*  
13  
14  
15 741 2018;8(10):e023094. doi: 10.1136/bmjopen-2018-023094  
16  
17  
18 742  
19  
20  
21  
22  
23  
24  
25  
26  
27  
28  
29  
30  
31  
32  
33  
34  
35  
36  
37  
38  
39  
40  
41  
42  
43  
44  
45  
46  
47  
48  
49  
50  
51  
52  
53  
54  
55  
56  
57  
58  
59  
60

744 **Table 1. Characteristics of oncology specialists and pharmaceutical payment**745 **received by individual doctors.**

| Variable                                                   |            |
|------------------------------------------------------------|------------|
| <b>1. Characteristics of oncology specialists (N=1080)</b> |            |
| <b>Sex (N, %)</b>                                          |            |
| Men                                                        | 907 (84.0) |
| Women                                                      | 173 (16.0) |
| <b>Working institutions (N, %)</b>                         |            |
| University hospitals                                       | 442 (40.9) |
| Cancer hospitals                                           | 183 (16.9) |
| Other types of institutions                                | 455 (42.1) |
| <b>Working regions (N, %)</b>                              |            |
| Hokkaido                                                   | 52 (4.8)   |
| Tohoku                                                     | 58 (5.4)   |
| Kanto                                                      | 302 (28.0) |
| Chubu                                                      | 194 (18.0) |
| Kinki                                                      | 208 (19.3) |
| Chugoku                                                    | 88 (8.2)   |
| Shikoku                                                    | 43 (4.0)   |
| Kyushu                                                     | 135 (12.5) |
| <b>Year of certification (N, %)</b>                        |            |
| 2006                                                       | 45 (4.2)   |
| 2007                                                       | 77 (7.1)   |
| 2008                                                       | 71 (6.6)   |
| 2009                                                       | 98 (9.1)   |
| 2010                                                       | 133 (12.3) |
| 2011                                                       | 130 (12.0) |
| 2012                                                       | 124 (11.5) |
| 2013                                                       | 143 (13.2) |
| 2014                                                       | 98 (9.1)   |
| 2015                                                       | 85 (7.9)   |
| 2016                                                       | 76 (7.0)   |
| <b>Specialty (N, %)</b>                                    |            |
| Respirology                                                | 285 (26.4) |
| Gastroenterology                                           | 278 (25.7) |
| Hematology                                                 | 250 (23.2) |
| Breast                                                     | 72 (6.7)   |
| Head and neck                                              | 12 (1.1)   |
| Gynaecology                                                | 10 (0.9)   |
| Urology                                                    | 9 (0.8)    |
| Dermatology                                                | 2 (0.2)    |
| Other or undetermined                                      | 162 (15.0) |



## 2. Characteristics of payment (N=1080)

|                                                       |                                |
|-------------------------------------------------------|--------------------------------|
| Total monetary value of payment                       | 585,453,314 [3,963,800]        |
| Total count of payment                                | 7,325                          |
| Type of payment (¥ [£], %)                            |                                |
| Speaking                                              | 467,802,690 [3,167,249], 79.9  |
| Consulting                                            | 94,682,807 [641,048], 16.2     |
| Writing                                               | 22,266,186 [150,753], 3.8      |
| Missing                                               | 701,631 [4,750], 0.1           |
| Payment per individual specialist                     |                                |
| Median value per individual specialist (¥ [£],        | 120,016 [813] (0 [0] – 449,378 |
| Interquartile range)                                  | [3,043])                       |
| Median count per individual specialist (Interquartile | 2 (0–7)                        |
| range)                                                |                                |
| Number of oncology specialists with payment (N, %)    |                                |
| Any                                                   | 763 (70.6)                     |
| ¥1 million [£6,800] or above                          | 142 (13.1)                     |
| ¥5 million [£33,900] or above                         | 19 (1.8)                       |
| ¥10 million [£67,700] or above                        | 2 (0.2)                        |
| Monetary value of payment according to specialties    |                                |
| (¥ [£], %)                                            |                                |
| Respirology                                           | 216,806,522 [1,467,884], 37.0  |
| Gastroenterology                                      | 139,690,202 [945,770], 23.9    |
| Hematology                                            | 119,219,713 [807,175], 20.4    |
| Breast                                                | 49,287,661 [333,701], 8.4      |
| Head and neck                                         | 9,213,401 [62,379], 1.6        |
| Gynaecology                                           | 570,533 [3,863], 0.1           |
| Urology                                               | 7,862,285 [53,231], 1.3        |
| Dermatology                                           | 562,502 [3,808], 0.1           |
| Other or undetermined                                 | 42,240,495 [285,988], 7.2      |

746 We converted Japanese yen (¥) to Pound Sterling (£), using the average monthly

747 exchange rate for 2016, namely ¥147.7 yen per £1.

748

749 **Table 2. Companies making a payment to oncology specialists and monetary value**  
 750 **and count of their payment**

| Pharmaceutical company                 | Monetary value (¥ [£]) | Count |
|----------------------------------------|------------------------|-------|
| Chugai Pharmaceutical Co., Ltd.        | 103,830,493 [702,982]  | 1,248 |
| AstraZeneca plc                        | 51,928,785 [351,583]   | 592   |
| Taiho Pharmaceutical Co., Ltd.         | 50,723,560 [343,423]   | 688   |
| Ono Pharmaceutical Co., Ltd.           | 47,831,737 [323,844]   | 624   |
| Eli Lilly Japan K.K.                   | 44,825,340 [303,489]   | 502   |
| Bristol-Myers Squibb K.K.              | 33,443,966 [226,432]   | 405   |
| Takeda Pharmaceutical Company Ltd.     | 28,280,960 [191,476]   | 306   |
| Novartis Pharma K.K.                   | 27,203,346 [184,180]   | 336   |
| Nippon Boehringer Ingelheim Co., Ltd.  | 25,987,859 [175,950]   | 325   |
| Kyowa Hakko Kirin Company, Ltd.        | 20,208,095 [136,819]   | 267   |
| Pfizer Japan Inc.                      | 16,509,478 [111,777]   | 185   |
| Merck Serono Co., Ltd.                 | 16,377,746 [110,885]   | 229   |
| Eisai Co., Ltd.                        | 16,309,136 [110,421]   | 220   |
| Celgene Corporation                    | 15,207,296 [102,961]   | 212   |
| Daiichi Sankyo Company, Limited.       | 8,772,101 [59,391]     | 117   |
| Bayer Yakuhin, Ltd.                    | 8,340,481 [56,469]     | 97    |
| Yakult Honsha Company, Limited.        | 8,318,026 [56,317]     | 121   |
| Janssen Pharmaceutical K.K.            | 7,723,516 [52,292]     | 84    |
| MSD K.K.                               | 6,317,468 [42,772]     | 71    |
| Sumitomo Dainippon Pharma Co., Ltd.    | 5,196,201 [35,181]     | 92    |
| Nippon Kayaku Co., Ltd.                | 3,868,780 [26,194]     | 46    |
| Astellas Pharma Inc.                   | 3,590,000 [24,306]     | 53    |
| Nippon Shinyaku Co., Ltd.              | 3,129,497 [21,188]     | 53    |
| Asahi Kasei Pharma Corporation         | 3,102,452 [21,005]     | 45    |
| Sanofi K.K.                            | 2,592,500 [17,552]     | 31    |
| Otsuka Holdings Co., Ltd.              | 2,204,198 [14,923]     | 40    |
| Mochida Pharmaceutical Co., Ltd.       | 2,149,441 [14,553]     | 31    |
| Teijin Pharma Limited.                 | 2,099,790 [14,217]     | 27    |
| AbbVie GK,                             | 2,082,626 [14,100]     | 17    |
| Shionogi & Co., Ltd.                   | 1,948,968 [13,195]     | 28    |
| Kyorin Pharmaceutical Co., Ltd.        | 1,918,033 [12,986]     | 34    |
| Tsumura & Co.                          | 1,681,688 [11,386]     | 21    |
| Meiji Seika Pharma Co., Ltd.           | 1,289,000 [8,727]      | 24    |
| Terumo Corporation                     | 1,214,840 [8,225]      | 16    |
| Kissei Pharmaceutical Co., Ltd.        | 1,124,840 [7,616]      | 9     |
| Zeria Pharmaceutical Co., Ltd.         | 946,645 [6,409]        | 12    |
| Mitsubishi Tanabe Pharma Corporation   | 935,508 [6,334]        | 17    |
| EA Pharma Co., Ltd.                    | 783,712 [5,306]        | 17    |
| Taisho Toyama Pharmaceutical Co., Ltd. | 701,631 [4,750]        | 11    |
| Kowa Company, Ltd.                     | 590,262 [3,996]        | 5     |
| Hisamitsu Pharmaceutical Co., Inc.     | 539,030 [3,649]        | 11    |

|    |                                           |                                                                                |   |
|----|-------------------------------------------|--------------------------------------------------------------------------------|---|
| 1  |                                           |                                                                                |   |
| 2  |                                           |                                                                                |   |
| 3  |                                           |                                                                                |   |
| 4  |                                           |                                                                                |   |
| 5  |                                           |                                                                                |   |
| 6  | Novo Nordisk Pharma Ltd.                  | 474,360 [3,212]                                                                | 8 |
| 7  | Sanwa Kagaku Kenkyusho Co., Ltd.          | 445,480 [3,016]                                                                | 4 |
| 8  | Aska Pharmaceutical Co., Ltd.             | 423,206 [2,865]                                                                | 6 |
| 9  | Shire Japan K.K.                          | 367,521 [2,488]                                                                | 5 |
| 10 | Nihon Pharmaceutical Co., Ltd.            | 311,836 [2,111]                                                                | 8 |
| 11 | Nippon Chemiphar Co., Ltd.                | 278,425 [1,885]                                                                | 3 |
| 12 | Ayumi Pharmaceutical Corporation          | 226,864 [1,536]                                                                | 3 |
| 13 | Mylan Seiyaku Ltd.                        | 206,240 [1,396]                                                                | 4 |
| 14 | Kracie Holdings, Ltd.                     | 134,056 [908]                                                                  | 2 |
| 15 | GlaxoSmithKline K.K.                      | 111,370 [754]                                                                  | 2 |
| 16 | Minophagen Pharmaceutical Co.             | 110,440 [748]                                                                  | 2 |
| 17 | Maruho Co., Ltd.                          | 103,120 [698]                                                                  | 1 |
| 18 | Torii Pharmaceutical Co., Ltd.            | 102,260 [692]                                                                  | 2 |
| 19 | EN Otsuka Pharmaceutical Co., Ltd.        | 89,096 [603]                                                                   | 2 |
| 20 | Kaken Pharmaceutical Co., Ltd.            | 77,959 [528]                                                                   | 1 |
| 21 | Toray Industries, Inc.                    | 77,080 [522]                                                                   | 1 |
| 22 | Santen Pharmaceutical Co., Ltd.           | 51,560 [349]                                                                   | 1 |
| 23 | Toyama Chemical Co., Ltd.                 | 33,410 [226]                                                                   | 1 |
| 24 | Bee Brand Medico Dental. Co., Ltd.        | 0 [0]                                                                          | 0 |
| 25 | Biofermin Seiyaku Co., Ltd.               | 0 [0]                                                                          | 0 |
| 26 | Fujimoto Pharmaceutical Corporation       | 0 [0]                                                                          | 0 |
| 27 | Fuso Pharmaceutical Industries, Ltd.      | 0 [0]                                                                          | 0 |
| 28 | Japan Tobacco Inc.                        | 0 [0]                                                                          | 0 |
| 29 | Kyoto Pharmaceutical Industries, Ltd.     | 0 [0]                                                                          | 0 |
| 30 | Maruishi Pharmaceutical Co., Ltd.         | 0 [0]                                                                          | 0 |
| 31 | Nippon Zoki Pharmaceutical Co., Ltd.      | 0 [0]                                                                          | 0 |
| 32 | Otsuka Pharmaceutical Co., Ltd.           | 0 [0]                                                                          | 0 |
| 33 | Otsuka Pharmaceutical Factory, Inc.       | 0 [0]                                                                          | 0 |
| 34 | POLA-Pharma.                              | 0 [0]                                                                          | 0 |
| 35 | Research Institute for Microbial Diseases | 0 [0]                                                                          | 0 |
| 36 | Seikagaku Corporation                     | 0 [0]                                                                          | 0 |
| 37 | Senju Pharmaceutical Co., Ltd.            | 0 [0]                                                                          | 0 |
| 38 | Taisho Pharmaceutical Co., Ltd.           | 0 [0]                                                                          | 0 |
| 39 | Teikoku Seiyaku Co., Ltd.                 | 0 [0]                                                                          | 0 |
| 40 | Toa Eiyo Ltd.                             | 0 [0]                                                                          | 0 |
| 41 | UCB Japan Co., Ltd.                       | 0 [0]                                                                          | 0 |
| 42 | Wakamoto Pharmaceutical Co., Ltd.         | 0 [0]                                                                          | 0 |
| 43 |                                           |                                                                                |   |
| 44 |                                           |                                                                                |   |
| 45 |                                           |                                                                                |   |
| 46 |                                           |                                                                                |   |
| 47 |                                           |                                                                                |   |
| 48 |                                           |                                                                                |   |
| 49 | 751                                       | We converted Japanese yen (¥) to Pound Sterling (£), using the average monthly |   |
| 50 |                                           |                                                                                |   |
| 51 |                                           |                                                                                |   |
| 52 | 752                                       | exchange rate for 2016, namely ¥147.7 yen per £1.                              |   |
| 53 |                                           |                                                                                |   |
| 54 |                                           |                                                                                |   |
| 55 | 753                                       |                                                                                |   |
| 56 |                                           |                                                                                |   |
| 57 |                                           |                                                                                |   |
| 58 |                                           |                                                                                |   |
| 59 |                                           |                                                                                |   |
| 60 |                                           |                                                                                |   |

754 **Table 3. Characteristics of oncology specialists and pharmaceutical company payments received in 2016, according to the**

755 **monetary value of the payment**

756

| Variable                                       | High-payment Group (¥1 million [£6,800] or more)<br>(N=142) | Low-payment Group (¥1 – 1 million<br>[£6,800])<br>(N=621) | No-payment Group (¥0)<br>(N=317) |
|------------------------------------------------|-------------------------------------------------------------|-----------------------------------------------------------|----------------------------------|
| <b>Characteristics of oncology specialists</b> |                                                             |                                                           |                                  |
| <b>Sex (N, %)</b>                              |                                                             |                                                           |                                  |
| Men                                            | 133 (93.7)                                                  | 555 (89.4)                                                | 219 (69.1)                       |
| Women                                          | 9 (6.3)                                                     | 66 (10.6)                                                 | 98 (30.9)                        |
| <b>Working institutions (N, %)</b>             |                                                             |                                                           |                                  |
| University hospitals                           | 75 (52.8)                                                   | 248 (39.9)                                                | 119 (37.5)                       |
| Cancer hospitals                               | 40 (28.2)                                                   | 98 (15.8)                                                 | 45 (14.2)                        |
| Other types of institutions                    | 27 (19.0)                                                   | 275 (44.3)                                                | 153 (48.3)                       |
| <b>Working regions (N, %)</b>                  |                                                             |                                                           |                                  |
| Hokkaido                                       | 4 (2.8)                                                     | 37 (6.0)                                                  | 11 (3.5)                         |
| Tohoku                                         | 11 (7.8)                                                    | 30 (4.8)                                                  | 17 (5.4)                         |
| Kanto                                          | 45 (31.7)                                                   | 162 (26.1)                                                | 95 (30.0)                        |
| Chubu                                          | 23 (16.2)                                                   | 113 (18.2)                                                | 58 (18.3)                        |
| Kinki                                          | 29 (20.4)                                                   | 108 (17.4)                                                | 71 (22.4)                        |
| Chugoku                                        | 9 (6.3)                                                     | 60 (9.7)                                                  | 19 (6.0)                         |
| Shikoku                                        | 5 (3.5)                                                     | 31 (5.0)                                                  | 7 (2.2)                          |

50

|    |                              |           |           |           |
|----|------------------------------|-----------|-----------|-----------|
| 1  |                              |           |           |           |
| 2  |                              |           |           |           |
| 3  |                              |           |           |           |
| 4  | Kyushu                       | 16 (11.3) | 80 (12.9) | 39 (12.3) |
| 5  | Year of certification (N, %) |           |           |           |
| 6  |                              |           |           |           |
| 7  | 2006                         | 22 (15.5) | 21 (3.4)  | 2 (0.6)   |
| 8  | 2007                         | 15 (10.6) | 46 (7.4)  | 16 (5.1)  |
| 9  | 2008                         | 19 (13.4) | 38 (6.1)  | 14 (4.4)  |
| 10 | 2009                         | 19 (13.4) | 56 (9.0)  | 23 (7.3)  |
| 11 | 2010                         | 23 (16.2) | 80 (12.9) | 30 (9.5)  |
| 12 | 2011                         | 16 (11.3) | 73 (11.8) | 41 (12.9) |
| 13 | 2012                         | 9 (6.3)   | 72 (11.6) | 43 (13.6) |
| 14 | 2013                         | 9 (6.3)   | 79 (12.7) | 55 (17.4) |
| 15 | 2014                         | 5 (3.5)   | 65 (10.5) | 28 (8.8)  |
| 16 | 2015                         | 2 (1.4)   | 51 (8.2)  | 32 (10.1) |
| 17 | 2016                         | 3 (2.1)   | 40 (6.4)  | 33 (10.4) |
| 18 |                              |           |           |           |
| 19 |                              |           |           |           |
| 20 |                              |           |           |           |
| 21 |                              |           |           |           |
| 22 |                              |           |           |           |
| 23 |                              |           |           |           |
| 24 |                              |           |           |           |
| 25 |                              |           |           |           |
| 26 |                              |           |           |           |
| 27 |                              |           |           |           |
| 28 |                              |           |           |           |
| 29 |                              |           |           |           |
| 30 |                              |           |           |           |
| 31 |                              |           |           |           |
| 32 |                              |           |           |           |
| 33 |                              |           |           |           |
| 34 |                              |           |           |           |
| 35 |                              |           |           |           |
| 36 |                              |           |           |           |
| 37 |                              |           |           |           |
| 38 |                              |           |           |           |
| 39 |                              |           |           |           |
| 40 |                              |           |           |           |
| 41 |                              |           |           |           |
| 42 |                              |           |           |           |
| 43 |                              |           |           |           |
| 44 |                              |           |           |           |
| 45 |                              |           |           |           |
| 46 |                              |           |           |           |

## Specialty (N, %)

|                       |           |            |           |
|-----------------------|-----------|------------|-----------|
| Respirology           | 55 (38.7) | 165 (26.6) | 65 (20.5) |
| Gastroenterology      | 33 (23.2) | 178 (28.7) | 67 (21.1) |
| Hematology            | 28 (19.7) | 139 (22.4) | 83 (26.2) |
| Breast                | 16 (11.3) | 34 (5.5)   | 22 (6.9)  |
| Head and neck         | 3 (2.1)   | 4 (0.6)    | 5 (1.6)   |
| Gynaecology           | 0 (0.0)   | 5 (0.8)    | 5 (1.6)   |
| Urology               | 1 (0.7)   | 6 (1.0)    | 2 (0.6)   |
| Dermatology           | 0 (0.0)   | 1 (0.2)    | 1 (0.3)   |
| Other or undetermined | 6 (4.2)   | 89 (14.3)  | 67 (21.1) |

Characteristics of pharmaceuticalpayment

## Total payment

|                                |                         |                         |
|--------------------------------|-------------------------|-------------------------|
| Total value of payment (¥ [£]) | 418,345,258 [2,832,398] | 167,108,056 [1,131,402] |
| Total count of payment         | 4,466                   | 2,859                   |

## Type of payment (¥ [£], %)

|            |                               |                             |
|------------|-------------------------------|-----------------------------|
| Speaking   | 327,075,925 [2,214,461], 78.2 | 140,726,765 [952,788], 84.2 |
| Consulting | 73,870,218 [500,137], 17.7    | 20,812,589 [140,911], 12.5  |
| Writing    | 17,053,868 [115,463], 4.1     | 5,212,318 [35,290], 3.1     |
| Missing    | 345,247 [2,337], 0.1          | 356,384 [2,413], 0.2        |

## Payment per individual specialist

|                                |                                                   |                                         |
|--------------------------------|---------------------------------------------------|-----------------------------------------|
| Median monetary value (¥ [£]), | 2,269,622 [15,366] (1,439,448 [9,746] – 3,681,775 | 171,086 [1,158] (89,096 [603] – 380,886 |
|--------------------------------|---------------------------------------------------|-----------------------------------------|

|    |                                        |                               |                            |
|----|----------------------------------------|-------------------------------|----------------------------|
| 1  |                                        |                               |                            |
| 2  |                                        |                               |                            |
| 3  |                                        |                               |                            |
| 4  | Interquartile range)                   | [24,927])                     | [2,579])                   |
| 5  | Median count (Interquartile range)     | 24 (19 – 38)                  | 3 (2 – 6)                  |
| 6  | Monetary value of payment according to |                               |                            |
| 7  | specialties (¥ [£], %)                 |                               |                            |
| 8  |                                        |                               |                            |
| 9  |                                        |                               |                            |
| 10 | Respirology                            | 169,761,707 [1,149,368], 40.6 | 47,044,815 [318,516], 28.2 |
| 11 |                                        |                               |                            |
| 12 | Gastroenterology                       | 92,334,612 [625,150], 22.1    | 47,335,590 [320,485], 28.3 |
| 13 |                                        |                               |                            |
| 14 | Hematology                             | 81,963,421 [554,932], 19.6    | 37,256,292 [252,243], 22.3 |
| 15 |                                        |                               |                            |
| 16 | Breast                                 | 42,090,455 [284,973], 10.1    | 7,197,206 [48,729], 4.3    |
| 17 |                                        |                               |                            |
| 18 | Head and neck                          | 8,689,962 [58,835], 2.1       | 523,439 [3,544], 0.3       |
| 19 |                                        |                               |                            |
| 20 | Gynaecology                            | 0 [0], 0                      | 570,533 [3,863], 0.3       |
| 21 |                                        |                               |                            |
| 22 | Urology                                | 5,527,458 [37,424], 1.3       | 2,334,827 [15,808], 1.4    |
| 23 |                                        |                               |                            |
| 24 | Dermatology                            | 0 [0], 0                      | 562,502 [3,808], 0.3       |
| 25 |                                        |                               |                            |
| 26 | Other or undetermined                  | 17,977,643 [121,717], 4.3     | 24,262,852 [164,271], 14.5 |
| 27 |                                        |                               |                            |

757 We converted Japanese yen (¥) to Pound Sterling (£), using the average monthly exchange rate for 2016, namely ¥147.7 yen per £1.

758 **Table 4. Multivariate negative binomial model for the monetary value of payment on an individual basis**

| Variable                     | All (N=1080)<br>Relative monetary value per year<br>(95% CI) | Low-payment and No-payment Groups (¥0 – 1 million [£6,800])<br>(N=938)<br>Relative monetary value per year (95% CI) |
|------------------------------|--------------------------------------------------------------|---------------------------------------------------------------------------------------------------------------------|
| <b>Sex</b>                   |                                                              |                                                                                                                     |
| Men                          | Ref.                                                         | Ref.                                                                                                                |
| Women                        | 0.40 (0.20 – 0.79)***                                        | 0.40 (0.28 – 0.58)***                                                                                               |
| <b>Types of affiliations</b> |                                                              |                                                                                                                     |
| Other type of institutions   | Ref.                                                         | Ref.                                                                                                                |
| University hospitals         | 5.78 (3.34 – 10.02)***                                       | 1.08 (0.80 – 1.47)                                                                                                  |
| Cancer hospitals             | 5.47 (3.30 – 9.06)***                                        | 1.11 (0.90 – 1.37)                                                                                                  |
| <b>Working region</b>        |                                                              |                                                                                                                     |
| Kanto                        | Ref.                                                         | Ref.                                                                                                                |
| Hokkaido                     | 0.45 (0.16 – 1.26)                                           | 0.82 (0.54 – 1.23)                                                                                                  |
| Tohoku                       | 1.41 (0.62 – 3.20)                                           | 1.07 (0.69 – 1.67)                                                                                                  |
| Chubu                        | 0.86 (0.41 – 1.81)                                           | 0.96 (0.72 – 1.29)                                                                                                  |
| Kinki                        | 1.14 (0.66 – 1.96)                                           | 0.74 (0.54 – 1.03)                                                                                                  |



|                                                  |                       |                       |
|--------------------------------------------------|-----------------------|-----------------------|
| Chugoku                                          | 1.47 (0.50 – 4.32)    | 0.80 (0.53 – 1.22)    |
| Shikoku                                          | 0.69 (0.32 – 1.53)    | 1.22 (0.78 – 1.89)    |
| Kyushu                                           | 1.18 (0.55 – 2.51)    | 1.04 (0.74 – 1.45)    |
| Year of experience after the board certification | 1.40 (1.30 – 1.50)*** | 1.13 (1.09 – 1.17)*** |
| Subspecialty                                     |                       |                       |
| Respirology                                      | Ref.                  | Ref.                  |
| Gastroenterology                                 | 0.57 (0.32 – 1.01)    | 0.94 (0.72 – 1.22)    |
| Hematology                                       | 0.49 (0.30 – 0.83)**  | 0.76 (0.57 – 1.00)*   |
| Breast                                           | 1.50 (0.68 – 3.33)    | 0.73 (0.45 – 1.19)    |
| Other or undetermined†                           | 0.28 (0.12 – 0.64)**  | 0.69 (0.51 – 0.93)*   |

759 † Other or undetermined specialties included Head and neck cancer, Gynaecology, Urology and Dermatology. Due to the small number

760 of physicians in these four specialties, they were included in the “other or undetermined” category; CI=Confidence interval; \* <0.05, \*\*

761 <0.01, \*\*\* <0.001

762

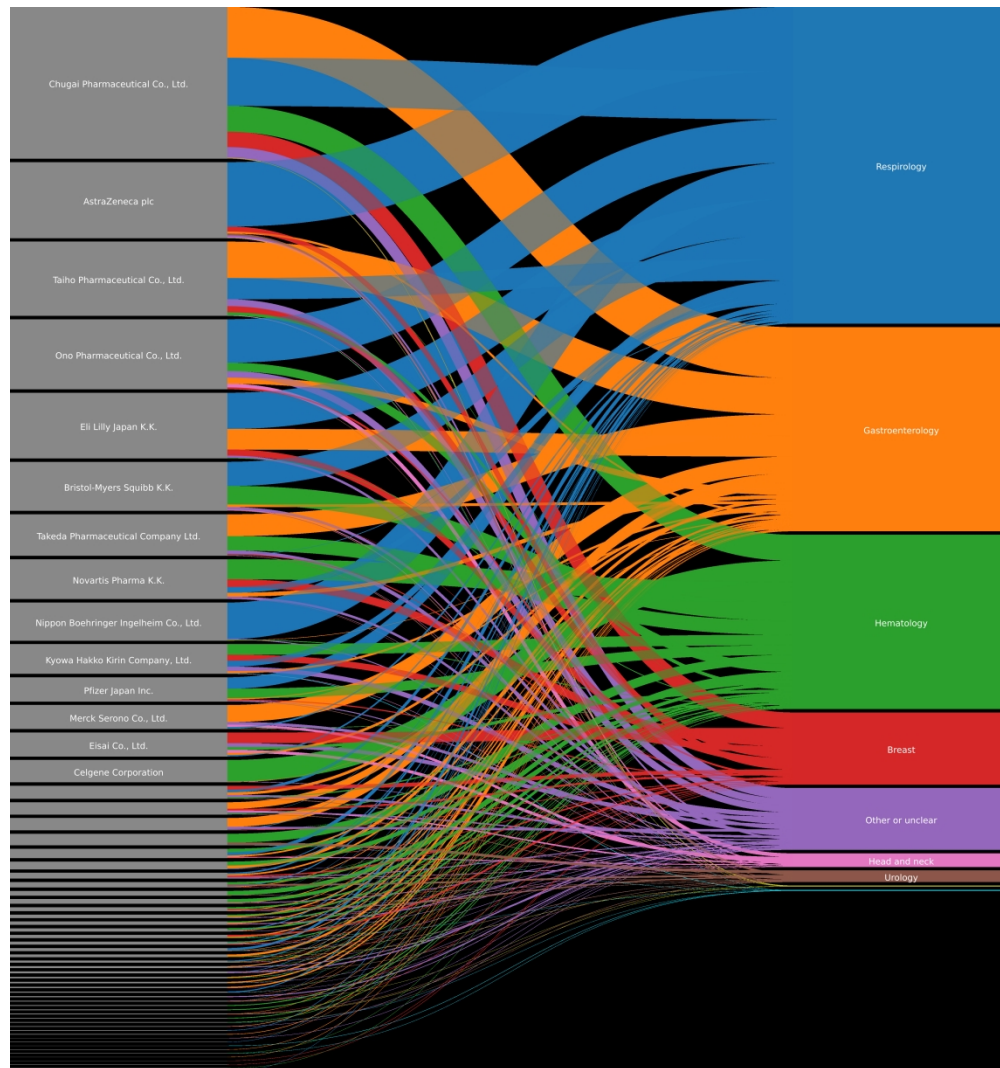

**Figure 1.** Distribution of payments to each subspecialty on an individual company basis. The companies and specialties are sorted in descending order with regard to payment value (proportionally expressed in the box height and band width in Figure 1). Band color represents the payment destination specialties. Due to space limitations, names of companies with payment values of less than ¥10 million (£67,700, €80,300, \$91,900) have been omitted.

**Supplementary Material 1. Seventy-eight pharmaceutical companies sampled and the start and end date of the period when the payment data was disclosed**

| Pharmaceutical company                          | Period of the payment data in 2016 |                   |
|-------------------------------------------------|------------------------------------|-------------------|
|                                                 | Start date                         | End date          |
| AbbVie GK                                       | January 1, 2016                    | December 31, 2016 |
| Asahi Kasei Pharma Corporation                  | April 1, 2016                      | March 31, 2017    |
| Aska Pharmaceutical Co., Ltd.                   | April 1, 2016                      | March 31, 2017    |
| Astellas Pharma Inc.                            | April 1, 2016                      | March 31, 2017    |
| AstraZeneca plc                                 | January 1, 2016                    | December 31, 2016 |
| Ayumi Pharmaceutical Corporation                | April 1, 2016                      | March 31, 2017    |
| Bayer Yakuhin, Ltd.                             | January 1, 2016                    | December 31, 2016 |
| Bee Brand Medico Dental. Co., Ltd. <sup>a</sup> | April 1, 2016                      | March 31, 2017    |
| Biofermin Seiyaku Co., Ltd. <sup>b</sup>        | April 1, 2016                      | March 31, 2017    |
| Bristol-Myers Squibb K.K.                       | April 1, 2016                      | March 31, 2017    |
| Celgene Corporation                             | January 1, 2016                    | December 31, 2016 |
| Chugai Pharmaceutical Co., Ltd.                 | January 1, 2016                    | December 31, 2016 |
| Daiichi Sankyo Company, Limited.                | April 1, 2016                      | March 31, 2017    |
| EA Pharma Co., Ltd.                             | April 1, 2016                      | March 31, 2017    |
| Eisai Co., Ltd.                                 | January 1, 2016                    | December 31, 2016 |
| Eli Lilly Japan K.K.                            | January 1, 2016                    | December 31, 2016 |
| EN Otsuka Pharmaceutical Co., Ltd. <sup>c</sup> | January 1, 2016                    | December 31, 2016 |
| Fujimoto Pharmaceutical Corporation             | July 1, 2016                       | June 30, 2017     |
| Fuso Pharmaceutical Industries, Ltd.            | April 1, 2016                      | March 31, 2017    |
| GlaxoSmithKline K.K.                            | January 1, 2016                    | December 31, 2016 |
| Hisamitsu Pharmaceutical Co., Inc.              | March 1, 2016                      | February 28, 2017 |
| Janssen Pharmaceutical K.K.                     | January 1, 2016                    | December 31, 2016 |
| Japan Tobacco Inc. <sup>d</sup>                 | Not available                      | Not available     |
| Kaken Pharmaceutical Co., Ltd.                  | April 1, 2016                      | March 31, 2017    |
| Kissei Pharmaceutical Co., Ltd.                 | April 1, 2016                      | March 31, 2017    |
| Kowa Company, Ltd.                              | April 1, 2016                      | March 31, 2017    |
| Kracie Holdings, Ltd.                           | January 1, 2016                    | December 31, 2016 |
| Kyorin Pharmaceutical Co., Ltd.                 | April 1, 2016                      | March 31, 2017    |

1  
2  
3  
4  
5  
6  
7  
8  
9  
10  
11  
12  
13  
14  
15  
16  
17  
18  
19  
20  
21  
22  
23  
24  
25  
26  
27  
28  
29  
30  
31  
32  
33  
34  
35  
36  
37  
38  
39  
40  
41  
42  
43  
44  
45  
46  
47  
48  
49  
50  
51  
52  
53  
54  
55  
56  
57  
58  
59  
60

|                                                  |                  |                    |
|--------------------------------------------------|------------------|--------------------|
| Kyoto Pharmaceutical Industries, Ltd.            | June 1, 2016     | May 31, 2017       |
| Kyowa Hakko Kirin Company, Ltd.                  | January 1, 2016  | December 31, 2016  |
| Maruho Co., Ltd.                                 | October 1, 2016  | September 30, 2017 |
| Maruishi Pharmaceutical Co., Ltd.                | April 1, 2016    | March 31, 2017     |
| Meiji Seika Pharma Co., Ltd.                     | April 1, 2016    | March 31, 2017     |
| Merck Serono Co., Ltd.                           | January 1, 2016  | December 31, 2016  |
| Minophagen Pharmaceutical Co.                    | April 1, 2016    | March 31, 2017     |
| Mitsubishi Tanabe Pharma Corporation             | April 1, 2016    | March 31, 2017     |
| Mochida Pharmaceutical Co., Ltd.                 | April 1, 2016    | March 31, 2017     |
| MSD K.K.                                         | January 1, 2016  | December 31, 2016  |
| Mylan Seiyaku Ltd.                               | January 1, 2016  | December 31, 2016  |
| Nihon Pharmaceutical Co., Ltd.                   | April 1, 2016    | March 31, 2017     |
| Nippon Boehringer Ingelheim Co., Ltd.            | January 1, 2016  | December 31, 2016  |
| Nippon Chemiphar Co., Ltd.                       | January 1, 2016  | December 31, 2016  |
| Nippon Kayaku Co., Ltd.                          | April 1, 2016    | March 31, 2017     |
| Nippon Shinyaku Co., Ltd.                        | April 1, 2016    | March 31, 2017     |
| Nippon Zoki Pharmaceutical Co., Ltd.             | April 1, 2016    | March 31, 2017     |
| Novartis Pharma K.K.                             | January 1, 2016  | December 31, 2016  |
| Novo Nordisk Pharma Ltd.                         | January 1, 2016  | December 31, 2016  |
| Ono Pharmaceutical Co., Ltd.                     | April 1, 2016    | March 31, 2017     |
| Otsuka Holdings Co., Ltd. <sup>e</sup>           | January 1, 2016  | December 31, 2016  |
| Otsuka Pharmaceutical Co., Ltd.                  | January 1, 2016  | December 31, 2016  |
| Otsuka Pharmaceutical Factory, Inc. <sup>f</sup> | January 1, 2016  | December 31, 2016  |
| Pfizer Japan Inc.                                | December 1, 2015 | November 30, 2016  |
| POLA-Pharma.                                     | January 1, 2016  | December 31, 2016  |
| Research Institute for Microbial Diseases        | April 1, 2016    | March 31, 2017     |
| Sanofi K.K.                                      | January 1, 2016  | December 31, 2016  |
| Santen Pharmaceutical Co., Ltd.                  | April 1, 2016    | March 31, 2017     |
| Sanwa Kagaku Kenkyusho Co., Ltd.                 | April 1, 2016    | March 31, 2017     |
| Seikagaku Corporation                            | April 1, 2016    | March 31, 2017     |
| Senju Pharmaceutical Co., Ltd.                   | April 1, 2016    | March 31, 2017     |
| Shionogi & Co., Ltd.                             | April 1, 2016    | March 31, 2017     |
| Shire Japan K.K.                                 | January 1, 2016  | December 31, 2016  |
| Sumitomo Dainippon Pharma Co., Ltd.              | April 1, 2016    | March 31, 2017     |

|                                                     |                 |                   |
|-----------------------------------------------------|-----------------|-------------------|
| Taiho Pharmaceutical Co., Ltd.                      | January 1, 2016 | December 31, 2016 |
| Taisho Pharmaceutical Co., Ltd.                     | April 1, 2016   | March 31, 2017    |
| Taisho Toyama Pharmaceutical Co., Ltd. <sup>g</sup> | April 1, 2016   | March 31, 2017    |
| Takeda Pharmaceutical Company Ltd.                  | April 1, 2016   | March 31, 2017    |
| Teijin Pharma Limited.                              | April 1, 2016   | March 31, 2017    |
| Teikoku Seiyaku Co., Ltd.                           | January 1, 2016 | December 31, 2016 |
| Terumo Corporation                                  | April 1, 2016   | March 31, 2017    |
| Toa Eiyo Ltd.                                       | April 1, 2016   | March 31, 2017    |
| Toray Industries, Inc.                              | April 1, 2016   | March 31, 2017    |
| Torii Pharmaceutical Co., Ltd.                      | January 1, 2016 | December 31, 2016 |
| Toyama Chemical Co., Ltd.                           | April 1, 2016   | March 31, 2017    |
| Tsumura & Co.                                       | April 1, 2016   | March 31, 2017    |
| UCB Japan Co., Ltd.                                 | January 1, 2016 | December 31, 2016 |
| Wakamoto Pharmaceutical Co., Ltd.                   | April 1, 2016   | March 31, 2017    |
| Yakult Honsha Company, Limited.                     | April 1, 2016   | March 31, 2017    |
| Zeria Pharmaceutical Co., Ltd.                      | April 1, 2016   | March 31, 2017    |

<sup>a</sup> Affiliated company of Ono Pharmaceutical Co., Ltd.; <sup>b</sup> affiliated company of Taisho

Pharmaceutical Co., Ltd.; <sup>c</sup> affiliated company of Otsuka Pharmaceutical Co., Ltd.; <sup>d</sup> the company

left the Japan Pharmaceutical Manufacturers Association on March 31, 2018; <sup>e</sup> affiliated company of

Otsuka Pharmaceutical Co., Ltd.; <sup>f</sup> affiliated company of Otsuka Pharmaceutical Co., Ltd.; <sup>g</sup>

affiliated company of Taisho Pharmaceutical Co., Ltd. and Toyama Chemical Co., Ltd.

**Supplementary Material 2. Monetary value of payment (¥ [£]) in each company according to oncology subspecialty**

| Company                               | Respirology             | Gastroenterology        | Hematology              | Breast                 | Head and neck         | Gynaecology        | Urology              | Dermatology  | Other or unclear      | Total                    |
|---------------------------------------|-------------------------|-------------------------|-------------------------|------------------------|-----------------------|--------------------|----------------------|--------------|-----------------------|--------------------------|
| Chugai Pharmaceutical Co., Ltd.       | 32,937,605<br>[223,003] | 34,760,717<br>[235,347] | 17,702,450<br>[119,854] | 10,548,519<br>[71,419] | 0 [0]                 | 332,202<br>[2,249] | 229,104<br>[1,551]   | 0 [0]        | 7,319,896<br>[49,559] | 103,830,493<br>[702,982] |
| AstraZeneca plc                       | 44,013,864<br>[297,995] | 1,342,002 [9,086]       | 111,370 [754]           | 3,454,557<br>[23,389]  | 623,673<br>[4,223]    | 77,959 [528]       | 1,269,618<br>[8,596] | 0 [0]        | 1,035,742<br>[7,012]  | 51,928,785<br>[351,583]  |
| Taiho Pharmaceutical Co., Ltd.        | 14,561,511<br>[98,588]  | 24,880,266<br>[168,451] | 2,116,030<br>[14,327]   | 4,176,377<br>[28,276]  | 222,740<br>[1,508]    | 33,411 [226]       | 0 [0]                | 33,411 [226] | 4,699,814<br>[31,820] | 50,723,560<br>[343,423]  |
| Ono Pharmaceutical Co., Ltd.          | 29,657,836<br>[200,798] | 4,219,238<br>[28,566]   | 5,746,692<br>[38,908]   | 1,124,838<br>[7,616]   | 2,450,141<br>[16,589] | 0 [0]              | 133,644<br>[905]     | 0 [0]        | 4,499,348<br>[30,463] | 47,831,737<br>[323,844]  |
| Eli Lilly Japan K.K.                  | 24,707,436<br>[167,281] | 14,101,874<br>[95,476]  | 412,069<br>[2,790]      | 4,145,014<br>[28,064]  | 0 [0]                 | 0 [0]              | 0 [0]                | 0 [0]        | 1,458,947<br>[9,878]  | 44,825,340<br>[303,489]  |
| Bristol-Myers Squibb K.K.             | 16,471,626<br>[111,521] | 1,848,742<br>[12,517]   | 12,617,772<br>[85,428]  | 33,411<br>[226]        | 356,384<br>[2,413]    | 0 [0]              | 334,111<br>[2,262]   | 0 [0]        | 1,781,920<br>[12,064] | 33,443,966<br>[226,432]  |
| Takeda Pharmaceutical Company Ltd.    | 329,974<br>[2,234]      | 14,889,129<br>[100,807] | 9,781,123<br>[66,223]   | 579,124<br>[3,921]     | 57,276<br>[388]       | 0 [0]              | 286,381<br>[1,939]   | 0 [0]        | 2,357,953<br>[15,964] | 28,280,960<br>[191,476]  |
| Novartis Pharma K.K.                  | 4,031,596<br>[27,296]   | 2,609,889<br>[17,670]   | 13,667,153<br>[92,533]  | 5,260,980<br>[35,619]  | 77,959<br>[528]       | 0 [0]              | 55,685<br>[377]      | 0 [0]        | 1,500,084<br>[10,156] | 27,203,346<br>[184,180]  |
| Nippon Boehringer Ingelheim Co., Ltd. | 24,840,981<br>[168,185] | 189,329 [1,282]         | 434,110<br>[2,939]      | 0 [0]                  | 0 [0]                 | 0 [0]              | 0 [0]                | 0 [0]        | 523,439<br>[3,544]    | 25,987,859<br>[175,950]  |

|    |                                        |              |                   |              |           |           |       |           |              |           |            |
|----|----------------------------------------|--------------|-------------------|--------------|-----------|-----------|-------|-----------|--------------|-----------|------------|
| 1  |                                        |              |                   |              |           |           |       |           |              |           |            |
| 2  |                                        |              |                   |              |           |           |       |           |              |           |            |
| 3  |                                        |              |                   |              |           |           |       |           |              |           |            |
| 4  |                                        |              |                   |              |           |           |       |           |              |           |            |
| 5  | Kyowa Hakko Kirin Company, Ltd.        | 4,065,005    | 1,425,536 [9,652] | 7,127,681    | 4,181,946 | 111,370   | 0 [0] | 0 [0]     | 222,740      | 3,073,817 | 20,208,095 |
| 6  |                                        | [27,522]     |                   | [48,258]     | [28,314]  | [754]     |       |           | [1,508]      | [20,811]  | [136,819]  |
| 7  |                                        |              |                   |              |           |           |       |           |              |           |            |
| 8  | Pfizer Japan Inc.                      | 7,782,876    | 788,768 [5,340]   | 6,543,478    | 638,311   | 0 [0]     | 0 [0] | 217,649   | 0 [0]        | 538,396   | 16,509,478 |
| 9  |                                        | [52,694]     |                   | [44,302]     | [4,322]   |           |       | [1,474]   |              | [3,645]   | [111,777]  |
| 10 |                                        |              |                   |              |           |           |       |           |              |           |            |
| 11 | Merck Serono Co., Ltd.                 | 1,002,330    | 11,588,836        | 245,014      | 111,370   | 1,603,728 | 0 [0] | 0 [0]     | 0 [0]        | 1,826,468 | 16,377,746 |
| 12 |                                        | [6,786]      | [78,462]          | [1,659]      | [754]     | [10,858]  |       |           |              | [12,366]  | [110,885]  |
| 13 |                                        |              |                   |              |           |           |       |           |              |           |            |
| 14 | Eisai Co., Ltd.                        | 890,961      | 1,624,796         | 1,982,386    | 7,244,821 | 1,948,977 | 0 [0] | 0 [0]     | 0 [0]        | 2,617,195 | 16,309,136 |
| 15 |                                        | [6,032]      | [11,001]          | [13,422]     | [49,051]  | [13,196]  |       |           |              | [17,720]  | [110,421]  |
| 16 |                                        |              |                   |              |           |           |       |           |              |           |            |
| 17 | Celgene Corporation                    | 0 [0]        | 226,864 [1,536]   | 14,722,632   | 0 [0]     | 0 [0]     | 0 [0] | 0 [0]     | 0 [0]        | 257,800   | 15,207,296 |
| 18 |                                        |              |                   | [99,679]     |           |           |       |           |              | [1,745]   | [102,961]  |
| 19 |                                        |              |                   |              |           |           |       |           |              |           |            |
| 20 | Daiichi Sankyo Company, Limited.       | 1,826,473    | 1,789,335         | 700,236      | 2,615,204 | 0 [0]     | 0 [0] | 389,796   | 0 [0]        | 1,451,057 | 8,772,101  |
| 21 |                                        | [12,366]     | [12,115]          | [4,741]      | [17,706]  |           |       | [2,639]   |              | [9,824]   | [59,391]   |
| 22 |                                        |              |                   |              |           |           |       |           |              |           |            |
| 23 | Bayer Yakuhin, Ltd.                    | 77,959 [528] | 4,397,978         | 645,946      | 1,264,054 | 863,118   | 0 [0] | 278,425   | 0 [0]        | 813,001   | 8,340,481  |
| 24 |                                        |              | [29,776]          | [4,373]      | [8,558]   | [5,844]   |       | [1,885]   |              | [5,504]   | [56,469]   |
| 25 |                                        |              |                   |              |           |           |       |           |              |           |            |
| 26 | Yakult Honsha Company, Limited.        | 412,486      | 5,946,230         | 51,561 [349] | 381,548   | 0 [0]     | 0 [0] | 0 [0]     | 0 [0]        | 1,526,201 | 8,318,026  |
| 27 |                                        | [2,793]      | [40,259]          |              | [2,583]   |           |       |           |              | [10,333]  | [56,317]   |
| 28 |                                        |              |                   |              |           |           |       |           |              |           |            |
| 29 | Janssen Pharmaceutical K.K.            | 0 [0]        | 0 [0]             | 5,924,886    | 0 [0]     | 0 [0]     | 0 [0] | 1,742,945 | 55,685 [377] | 0 [0]     | 7,723,516  |
| 30 |                                        |              |                   | [40,114]     |           |           |       | [11,801]  |              |           | [52,292]   |
| 31 |                                        |              |                   |              |           |           |       |           |              |           |            |
| 32 | MSD K.K.                               | 2,224,616    | 946,647 [6,409]   | 2,338,771    | 278,425   | 529,009   | 0 [0] | 0 [0]     | 0 [0]        | 0 [0]     | 6,317,468  |
| 33 |                                        | [15,062]     |                   | [15,835]     | [1,885]   | [3,582]   |       |           |              |           | [42,772]   |
| 34 |                                        |              |                   |              |           |           |       |           |              |           |            |
| 35 | Sumitomo Dainippon Pharma Co.,<br>Ltd. | 478,658      | 1,926,703         | 2,712,881    | 0 [0]     | 0 [0]     | 0 [0] | 0 [0]     | 0 [0]        | 77,959    | 5,196,201  |
| 36 |                                        | [3,241]      | [13,045]          | [18,368]     |           |           |       |           |              | [528]     | [35,181]   |
| 37 |                                        |              |                   |              |           |           |       |           |              |           |            |
| 38 |                                        |              |                   |              |           |           |       |           |              |           |            |
| 39 |                                        |              |                   |              |           |           |       |           |              |           |            |
| 40 |                                        |              |                   |              |           |           |       |           |              |           |            |
| 41 |                                        |              |                   |              |           |           |       |           |              |           |            |
| 42 |                                        |              |                   |              |           |           |       |           |              |           |            |
| 43 |                                        |              |                   |              |           |           |       |           |              |           |            |
| 44 |                                        |              |                   |              |           |           |       |           |              |           |            |
| 45 |                                        |              |                   |              |           |           |       |           |              |           |            |
| 46 |                                        |              |                   |              |           |           |       |           |              |           |            |

|    |                                        |               |                 |              |           |         |       |           |              |         |           |
|----|----------------------------------------|---------------|-----------------|--------------|-----------|---------|-------|-----------|--------------|---------|-----------|
| 1  |                                        |               |                 |              |           |         |       |           |              |         |           |
| 2  |                                        |               |                 |              |           |         |       |           |              |         |           |
| 3  |                                        |               |                 |              |           |         |       |           |              |         |           |
| 4  |                                        |               |                 |              |           |         |       |           |              |         |           |
| 5  | Nippon Kayaku Co., Ltd.                | 974,487       | 958,195 [6,487] | 55,685 [377] | 855,809   | 222,740 | 0 [0] | 222,740   | 0 [0]        | 579,124 | 3,868,780 |
| 6  |                                        | [6,598]       |                 |              | [5,794]   | [1,508] |       | [1,508]   |              | [3,921] | [26,194]  |
| 7  |                                        |               |                 |              |           |         |       |           |              |         |           |
| 8  | Astellas Pharma Inc.                   | 600,000       | 340,000 [2,302] | 1,400,000    | 100,000   | 0 [0]   | 0 [0] | 1,100,000 | 0 [0]        | 50,000  | 3,590,000 |
| 9  |                                        | [4,062]       |                 | [9,479]      | [677]     |         |       | [7,448]   |              | [339]   | [24,306]  |
| 10 |                                        |               |                 |              |           |         |       |           |              |         |           |
| 11 | Nippon Shinyaku Co., Ltd.              | 33,411 [226]  | 33,411 [226]    | 2,851,072    | 0 [0]     | 0 [0]   | 0 [0] | 211,603   | 0 [0]        | 0 [0]   | 3,129,497 |
| 12 |                                        |               |                 | [19,303]     |           |         |       | [1,433]   |              |         | [21,188]  |
| 13 |                                        |               |                 |              |           |         |       |           |              |         |           |
| 14 | Asahi Kasei Pharma Corporation         | 77,959 [528]  | 326,155 [2,208] | 2,138,304    | 0 [0]     | 0 [0]   | 0 [0] | 111,370   | 0 [0]        | 448,664 | 3,102,452 |
| 15 |                                        |               |                 | [14,477]     |           |         |       | [754]     |              | [3,038] | [21,005]  |
| 16 |                                        |               |                 |              |           |         |       |           |              |         |           |
| 17 | Sanofi K.K.                            | 0 [0]         | 312,500 [2,116] | 960,000      | 370,000   | 100,000 | 0 [0] | 750,000   | 0 [0]        | 100,000 | 2,592,500 |
| 18 |                                        |               |                 | [6,500]      | [2,505]   | [677]   |       | [5,078]   |              | [677]   | [17,552]  |
| 19 |                                        |               |                 |              |           |         |       |           |              |         |           |
| 20 | Otsuka Holdings Co., Ltd. <sup>e</sup> | 100,000 [677] | 770,000 [5,213] | 1,087,912    | 0 [0]     | 46,286  | 0 [0] | 0 [0]     | 0 [0]        | 200,000 | 2,204,198 |
| 21 |                                        |               |                 | [7,366]      |           | [313]   |       |           |              | [1,354] | [14,923]  |
| 22 |                                        |               |                 |              |           |         |       |           |              |         |           |
| 23 | Mochida Pharmaceutical Co., Ltd.       | 0 [0]         | 679,357 [4,600] | 790,727      | 111,370   | 0 [0]   | 0 [0] | 0 [0]     | 0 [0]        | 567,987 | 2,149,441 |
| 24 |                                        |               |                 | [5,354]      | [754]     |         |       |           |              | [3,846] | [14,553]  |
| 25 |                                        |               |                 |              |           |         |       |           |              |         |           |
| 26 | Peijin Pharma Limited.                 | 550,000       | 359,790 [2,436] | 1,020,000    | 0 [0]     | 0 [0]   | 0 [0] | 0 [0]     | 0 [0]        | 170,000 | 2,099,790 |
| 27 |                                        | [3,724]       |                 | [6,906]      |           |         |       |           |              | [1,151] | [14,217]  |
| 28 |                                        |               |                 |              |           |         |       |           |              |         |           |
| 29 | AbbVie GK,                             | 0 [0]         | 735,042 [4,977] | 245,014      | 1,046,885 | 0 [0]   | 0 [0] | 0 [0]     | 55,685 [377] | 0 [0]   | 2,082,626 |
| 30 |                                        |               |                 | [1,659]      | [7,088]   |         |       |           |              |         | [14,100]  |
| 31 |                                        |               |                 |              |           |         |       |           |              |         |           |
| 32 | Shionogi & Co., Ltd.                   | 556,848       | 443,416 [3,002] | 567,160      | 206,240   | 0 [0]   | 0 [0] | 0 [0]     | 0 [0]        | 175,304 | 1,948,968 |
| 33 |                                        | [3,770]       |                 | [3,840]      | [1,396]   |         |       |           |              | [1,187] | [13,195]  |
| 34 |                                        |               |                 |              |           |         |       |           |              |         |           |
| 35 | Kyorin Pharmaceutical Co., Ltd.        | 1,443,680     | 144,368 [977]   | 72,184 [489] | 0 [0]     | 0 [0]   | 0 [0] | 206,241   | 0 [0]        | 51,560  | 1,918,033 |
| 36 |                                        | [9,774]       |                 |              |           |         |       | [1,396]   |              | [349]   | [12,986]  |
| 37 |                                        |               |                 |              |           |         |       |           |              |         |           |
| 38 |                                        |               |                 |              |           |         |       |           |              |         |           |
| 39 |                                        |               |                 |              |           |         |       |           |              |         |           |
| 40 |                                        |               |                 |              |           |         |       |           |              |         |           |
| 41 |                                        |               |                 |              |           |         |       |           |              |         |           |
| 42 |                                        |               |                 |              |           |         |       |           |              |         |           |
| 43 |                                        |               |                 |              |           |         |       |           |              |         |           |
| 44 |                                        |               |                 |              |           |         |       |           |              |         |           |
| 45 |                                        |               |                 |              |           |         |       |           |              |         |           |
| 46 |                                        |               |                 |              |           |         |       |           |              |         |           |



|    |                                        |               |                   |              |         |       |              |         |       |         |           |
|----|----------------------------------------|---------------|-------------------|--------------|---------|-------|--------------|---------|-------|---------|-----------|
| 1  |                                        |               |                   |              |         |       |              |         |       |         |           |
| 2  |                                        |               |                   |              |         |       |              |         |       |         |           |
| 3  |                                        |               |                   |              |         |       |              |         |       |         |           |
| 4  |                                        |               |                   |              |         |       |              |         |       |         |           |
| 5  | Tsumura & Co.                          | 33,411 [226]  | 1,347,578 [9,124] | 167,055      | 55,685  | 0 [0] | 77,959 [528] | 0 [0]   | 0 [0] | 0 [0]   | 1,681,688 |
| 6  |                                        |               |                   | [1,131]      | [377]   |       |              |         |       |         | [11,386]  |
| 7  |                                        |               |                   |              |         |       |              |         |       |         |           |
| 8  | Meiji Seika Pharma Co., Ltd.           | 649,656       | 154,680 [1,047]   | 278,424      | 103,120 | 0 [0] | 0 [0]        | 0 [0]   | 0 [0] | 103,120 | 1,289,000 |
| 9  |                                        | [4,398]       |                   | [1,885]      | [698]   |       |              |         |       | [698]   | [8,727]   |
| 10 |                                        |               |                   |              |         |       |              |         |       |         |           |
| 11 | Terumo Corporation                     | 110,440 [748] | 585,332 [3,963]   | 77,308 [523] | 0 [0]   | 0 [0] | 0 [0]        | 0 [0]   | 0 [0] | 441,760 | 1,214,840 |
| 12 |                                        |               |                   |              |         |       |              |         |       | [2,991] | [8,225]   |
| 13 |                                        |               |                   |              |         |       |              |         |       |         |           |
| 14 | Kissei Pharmaceutical Co., Ltd.        | 222,740       | 55,685 [377]      | 0 [0]        | 0 [0]   | 0 [0] | 0 [0]        | 144,781 | 0 [0] | 701,634 | 1,124,840 |
| 15 |                                        | [1,508]       |                   |              |         |       |              | [980]   |       | [4,750] | [7,616]   |
| 16 |                                        |               |                   |              |         |       |              |         |       |         |           |
| 17 | Zeria Pharmaceutical Co., Ltd.         | 77,959 [528]  | 645,946 [4,373]   | 222,740      | 0 [0]   | 0 [0] | 0 [0]        | 0 [0]   | 0 [0] | 0 [0]   | 946,645   |
| 18 |                                        |               |                   | [1,508]      |         |       |              |         |       |         | [6,409]   |
| 19 |                                        |               |                   |              |         |       |              |         |       |         |           |
| 20 | Mitsubishi Tanabe Pharma Corporation   | 77,959 [528]  | 712,768 [4,826]   | 33,411 [226] | 0 [0]   | 0 [0] | 0 [0]        | 0 [0]   | 0 [0] | 111,370 | 935,508   |
| 21 |                                        |               |                   |              |         |       |              |         |       | [754]   | [6,334]   |
| 22 |                                        |               |                   |              |         |       |              |         |       |         |           |
| 23 | EA Pharma Co., Ltd.                    | 0 [0]         | 752,776 [5,097]   | 0 [0]        | 0 [0]   | 0 [0] | 0 [0]        | 0 [0]   | 0 [0] | 30,936  | 783,712   |
| 24 |                                        |               |                   |              |         |       |              |         |       | [209]   | [5,306]   |
| 25 |                                        |               |                   |              |         |       |              |         |       |         |           |
| 26 | Taisho Toyama Pharmaceutical Co., Ltd. | 590,261       | 0 [0]             | 33,411 [226] | 0 [0]   | 0 [0] | 0 [0]        | 0 [0]   | 0 [0] | 77,959  | 701,631   |
| 27 |                                        | [3,996]       |                   |              |         |       |              |         |       | [528]   | [4,750]   |
| 28 |                                        |               |                   |              |         |       |              |         |       |         |           |
| 29 | Kowa Company, Ltd.                     | 0 [0]         | 33,411 [226]      | 0 [0]        | 0 [0]   | 0 [0] | 0 [0]        | 0 [0]   | 0 [0] | 556,851 | 590,262   |
| 30 |                                        |               |                   |              |         |       |              |         |       | [3,770] | [3,996]   |
| 31 |                                        |               |                   |              |         |       |              |         |       |         |           |
| 32 | Hisamitsu Pharmaceutical Co., Inc.     | 22,274 [151]  | 89,096 [603]      | 0 [0]        | 167,055 | 0 [0] | 15,591 [106] | 0 [0]   | 0 [0] | 245,014 | 539,030   |
| 33 |                                        |               |                   |              | [1131]  |       |              |         |       | [1,659] | [3,649]   |
| 34 |                                        |               |                   |              |         |       |              |         |       |         |           |
| 35 | Novo Nordisk Pharma Ltd.               | 0 [0]         | 0 [0]             | 474,360      | 0 [0]   | 0 [0] | 0 [0]        | 0 [0]   | 0 [0] | 0 [0]   | 474,360   |
| 36 |                                        |               |                   | [3,212]      |         |       |              |         |       |         | [3,212]   |
| 37 |                                        |               |                   |              |         |       |              |         |       |         |           |
| 38 |                                        |               |                   |              |         |       |              |         |       |         |           |
| 39 |                                        |               |                   |              |         |       |              |         |       |         |           |
| 40 |                                        |               |                   |              |         |       |              |         |       |         |           |
| 41 |                                        |               |                   |              |         |       |              |         |       |         |           |
| 42 |                                        |               |                   |              |         |       |              |         |       |         |           |
| 43 |                                        |               |                   |              |         |       |              |         |       |         |           |
| 44 |                                        |               |                   |              |         |       |              |         |       |         |           |
| 45 |                                        |               |                   |              |         |       |              |         |       |         |           |
| 46 |                                        |               |                   |              |         |       |              |         |       |         |           |

|    |                                  |               |                 |         |        |       |              |         |              |         |
|----|----------------------------------|---------------|-----------------|---------|--------|-------|--------------|---------|--------------|---------|
| 1  |                                  |               |                 |         |        |       |              |         |              |         |
| 2  |                                  |               |                 |         |        |       |              |         |              |         |
| 3  |                                  |               |                 |         |        |       |              |         |              |         |
| 4  |                                  |               |                 |         |        |       |              |         |              |         |
| 5  | Sanwa Kagaku Kenkyusho Co., Ltd. | 0 [0]         | 0 [0]           | 445,480 | 0 [0]  | 0 [0] | 0 [0]        | 0 [0]   | 0 [0]        | 445,480 |
| 6  |                                  |               | [3,016]         |         |        |       |              |         |              | [3,016] |
| 7  |                                  |               |                 |         |        |       |              |         |              |         |
| 8  | Aska Pharmaceutical Co., Ltd.    | 0 [0]         | 111,370 [754]   | 0 [0]   | 77,959 | 0 [0] | 33,411 [226] | 144,781 | 0 [0]        | 55,685  |
| 9  |                                  |               |                 |         | [528]  |       |              | [980]   |              | [377]   |
| 10 |                                  |               |                 |         |        |       |              |         |              |         |
| 11 | Shire Japan K.K.                 | 0 [0]         | 0 [0]           | 367,521 | 0 [0]  | 0 [0] | 0 [0]        | 0 [0]   | 0 [0]        | 367,521 |
| 12 |                                  |               |                 | [2,488] |        |       |              |         |              | [2,488] |
| 13 |                                  |               |                 |         |        |       |              |         |              |         |
| 14 | Nihon Pharmaceutical Co., Ltd.   | 0 [0]         | 0 [0]           | 245,014 | 0 [0]  | 0 [0] | 0 [0]        | 33,411  | 33,411 [226] | 0 [0]   |
| 15 |                                  |               |                 | [1,659] |        |       |              | [226]   |              | [2,111] |
| 16 |                                  |               |                 |         |        |       |              |         |              |         |
| 17 | Nippon Chemiphar Co., Ltd.       | 0 [0]         | 167,055 [1,131] | 0 [0]   | 0 [0]  | 0 [0] | 0 [0]        | 0 [0]   | 0 [0]        | 111,370 |
| 18 |                                  |               |                 |         |        |       |              |         |              | [754]   |
| 19 |                                  |               |                 |         |        |       |              |         |              |         |
| 20 | Ayumi Pharmaceutical Corporation | 226,864       | 0 [0]           | 0 [0]   | 0 [0]  | 0 [0] | 0 [0]        | 0 [0]   | 0 [0]        | 226,864 |
| 21 |                                  | [1,536]       |                 |         |        |       |              |         |              | [1,536] |
| 22 |                                  |               |                 |         |        |       |              |         |              |         |
| 23 | Mylan Seiyaku Ltd.               | 0 [0]         | 206,240 [1,396] | 0 [0]   | 0 [0]  | 0 [0] | 0 [0]        | 0 [0]   | 0 [0]        | 206,240 |
| 24 |                                  |               |                 |         |        |       |              |         |              | [1,396] |
| 25 |                                  |               |                 |         |        |       |              |         |              |         |
| 26 | Kracie Holdings, Ltd.            | 0 [0]         | 30,936 [209]    | 0 [0]   | 0 [0]  | 0 [0] | 0 [0]        | 0 [0]   | 0 [0]        | 103,120 |
| 27 |                                  |               |                 |         |        |       |              |         |              | [698]   |
| 28 |                                  |               |                 |         |        |       |              |         |              |         |
| 29 | GlaxoSmithKline K.K.             | 111,370 [754] | 0 [0]           | 0 [0]   | 0 [0]  | 0 [0] | 0 [0]        | 0 [0]   | 0 [0]        | 111,370 |
| 30 |                                  |               |                 |         |        |       |              |         |              | [754]   |
| 31 |                                  |               |                 |         |        |       |              |         |              |         |
| 32 | Minophagen Pharmaceutical Co.    | 0 [0]         | 0 [0]           | 0 [0]   | 0 [0]  | 0 [0] | 0 [0]        | 0 [0]   | 110,440      | 0 [0]   |
| 33 |                                  |               |                 |         |        |       |              |         | [748]        | [748]   |
| 34 |                                  |               |                 |         |        |       |              |         |              |         |
| 35 | Maruho Co., Ltd.                 | 0 [0]         | 103,120 [698]   | 0 [0]   | 0 [0]  | 0 [0] | 0 [0]        | 0 [0]   | 0 [0]        | 103,120 |
| 36 |                                  |               |                 |         |        |       |              |         |              | [698]   |
| 37 |                                  |               |                 |         |        |       |              |         |              |         |
| 38 |                                  |               |                 |         |        |       |              |         |              |         |
| 39 |                                  |               |                 |         |        |       |              |         |              |         |
| 40 |                                  |               |                 |         |        |       |              |         |              |         |
| 41 |                                  |               |                 |         |        |       |              |         |              |         |
| 42 |                                  |               |                 |         |        |       |              |         |              |         |
| 43 |                                  |               |                 |         |        |       |              |         |              |         |
| 44 |                                  |               |                 |         |        |       |              |         |              |         |
| 45 |                                  |               |                 |         |        |       |              |         |              |         |
| 46 |                                  |               |                 |         |        |       |              |         |              |         |

|    |                                                 |                            |                          |                          |                         |                       |                    |                       |                    |                         |                            |
|----|-------------------------------------------------|----------------------------|--------------------------|--------------------------|-------------------------|-----------------------|--------------------|-----------------------|--------------------|-------------------------|----------------------------|
| 1  |                                                 |                            |                          |                          |                         |                       |                    |                       |                    |                         |                            |
| 2  |                                                 |                            |                          |                          |                         |                       |                    |                       |                    |                         |                            |
| 3  |                                                 |                            |                          |                          |                         |                       |                    |                       |                    |                         |                            |
| 4  |                                                 |                            |                          |                          |                         |                       |                    |                       |                    |                         |                            |
| 5  | Torii Pharmaceutical Co., Ltd.                  | 0 [0]                      | 0 [0]                    | 51,130 [346]             | 0 [0]                   | 0 [0]                 | 0 [0]              | 0 [0]                 | 51,130 [346]       | 0 [0]                   | 102,260<br>[692]           |
| 6  |                                                 |                            |                          |                          |                         |                       |                    |                       |                    |                         |                            |
| 7  | EN Otsuka Pharmaceutical Co., Ltd. <sup>c</sup> | 0 [0]                      | 89,096 [603]             | 0 [0]                    | 0 [0]                   | 0 [0]                 | 0 [0]              | 0 [0]                 | 0 [0]              | 0 [0]                   | 89,096 [603]               |
| 8  |                                                 |                            |                          |                          |                         |                       |                    |                       |                    |                         |                            |
| 9  | Kaken Pharmaceutical Co., Ltd.                  | 0 [0]                      | 0 [0]                    | 0 [0]                    | 77,959<br>[528]         | 0 [0]                 | 0 [0]              | 0 [0]                 | 0 [0]              | 0 [0]                   | 77,959 [528]               |
| 10 |                                                 |                            |                          |                          |                         |                       |                    |                       |                    |                         |                            |
| 11 |                                                 |                            |                          |                          |                         |                       |                    |                       |                    |                         |                            |
| 12 | Horay Industries, Inc.                          | 0 [0]                      | 0 [0]                    | 0 [0]                    | 77,080<br>[522]         | 0 [0]                 | 0 [0]              | 0 [0]                 | 0 [0]              | 0 [0]                   | 77,080 [522]               |
| 13 |                                                 |                            |                          |                          |                         |                       |                    |                       |                    |                         |                            |
| 14 |                                                 |                            |                          |                          |                         |                       |                    |                       |                    |                         |                            |
| 15 | Santen Pharmaceutical Co., Ltd.                 | 0 [0]                      | 0 [0]                    | 51,560 [349]             | 0 [0]                   | 0 [0]                 | 0 [0]              | 0 [0]                 | 0 [0]              | 0 [0]                   | 51,560 [349]               |
| 16 |                                                 |                            |                          |                          |                         |                       |                    |                       |                    |                         |                            |
| 17 | Foyama Chemical Co., Ltd.                       | 33,410 [226]               | 0 [0]                    | 0 [0]                    | 0 [0]                   | 0 [0]                 | 0 [0]              | 0 [0]                 | 0 [0]              | 0 [0]                   | 33,410 [226]               |
| 18 |                                                 |                            |                          |                          |                         |                       |                    |                       |                    |                         |                            |
| 19 | Total                                           | 216,806,522<br>[1,467,884] | 139,690,202<br>[945,770] | 119,219,713<br>[807,175] | 49,287,661<br>[333,701] | 9,213,401<br>[62,379] | 570,533<br>[3,863] | 7,862,285<br>[53,231] | 562,502<br>[3,808] | 42,240,495<br>[285,988] | 585,453,314<br>[3,963,800] |
| 20 |                                                 |                            |                          |                          |                         |                       |                    |                       |                    |                         |                            |
| 21 |                                                 |                            |                          |                          |                         |                       |                    |                       |                    |                         |                            |
| 22 |                                                 |                            |                          |                          |                         |                       |                    |                       |                    |                         |                            |
| 23 |                                                 |                            |                          |                          |                         |                       |                    |                       |                    |                         |                            |
| 24 |                                                 |                            |                          |                          |                         |                       |                    |                       |                    |                         |                            |
| 25 |                                                 |                            |                          |                          |                         |                       |                    |                       |                    |                         |                            |
| 26 |                                                 |                            |                          |                          |                         |                       |                    |                       |                    |                         |                            |
| 27 |                                                 |                            |                          |                          |                         |                       |                    |                       |                    |                         |                            |
| 28 |                                                 |                            |                          |                          |                         |                       |                    |                       |                    |                         |                            |
| 29 |                                                 |                            |                          |                          |                         |                       |                    |                       |                    |                         |                            |
| 30 |                                                 |                            |                          |                          |                         |                       |                    |                       |                    |                         |                            |
| 31 |                                                 |                            |                          |                          |                         |                       |                    |                       |                    |                         |                            |
| 32 |                                                 |                            |                          |                          |                         |                       |                    |                       |                    |                         |                            |
| 33 |                                                 |                            |                          |                          |                         |                       |                    |                       |                    |                         |                            |
| 34 |                                                 |                            |                          |                          |                         |                       |                    |                       |                    |                         |                            |
| 35 |                                                 |                            |                          |                          |                         |                       |                    |                       |                    |                         |                            |
| 36 |                                                 |                            |                          |                          |                         |                       |                    |                       |                    |                         |                            |
| 37 |                                                 |                            |                          |                          |                         |                       |                    |                       |                    |                         |                            |
| 38 |                                                 |                            |                          |                          |                         |                       |                    |                       |                    |                         |                            |
| 39 |                                                 |                            |                          |                          |                         |                       |                    |                       |                    |                         |                            |
| 40 |                                                 |                            |                          |                          |                         |                       |                    |                       |                    |                         |                            |
| 41 |                                                 |                            |                          |                          |                         |                       |                    |                       |                    |                         |                            |
| 42 |                                                 |                            |                          |                          |                         |                       |                    |                       |                    |                         |                            |
| 43 |                                                 |                            |                          |                          |                         |                       |                    |                       |                    |                         |                            |
| 44 |                                                 |                            |                          |                          |                         |                       |                    |                       |                    |                         |                            |
| 45 |                                                 |                            |                          |                          |                         |                       |                    |                       |                    |                         |                            |
| 46 |                                                 |                            |                          |                          |                         |                       |                    |                       |                    |                         |                            |

We converted Japanese yen (¥) to Pound Sterling (£), using the average monthly exchange rate for 2016, namely ¥147.7 yen per £1.

**Supplementary Material 3. List of oncology drugs with Japanese domestic sales of at least ¥5 billion [£33.9 million] in 2016**

| Pharmaceutical company          | Drug name                | 2016 Sales (Billion, ¥) <sup>†</sup> | 2016 Sales (Million, £) <sup>†</sup> | Respirology | Gastroenterology | Hematology | Breast | Head and neck | Gynaecology | Urology | Dermatology | Other |
|---------------------------------|--------------------------|--------------------------------------|--------------------------------------|-------------|------------------|------------|--------|---------------|-------------|---------|-------------|-------|
| Astellas Pharma Inc.            | Enzalutamide             | 23.4                                 | 158.4                                | No          | No               | No         | No     | No            | No          | Yes     | No          | No    |
| Chugai Pharmaceutical Co., Ltd. | Bevacizumab              | 92.1                                 | 623.6                                | Yes         | Yes              | No         | Yes    | Yes           | Yes         | No      | No          | Yes   |
| Chugai Pharmaceutical Co., Ltd. | Trastuzumab              | 34.1                                 | 230.9                                | No          | Yes              | No         | Yes    | No            | No          | No      | No          | No    |
| Chugai Pharmaceutical Co., Ltd. | Rituximab                | 32.1 <sup>†</sup>                    | 217.3 <sup>†</sup>                   | No          | No               | Yes        | No     | No            | No          | No      | No          | No    |
| Chugai Pharmaceutical Co., Ltd. | Capecitabine             | 12.3                                 | 83.3                                 | No          | Yes              | No         | Yes    | No            | No          | No      | No          | No    |
| Chugai Pharmaceutical Co., Ltd. | Pertuzumab               | 11.9                                 | 80.6                                 | No          | No               | No         | Yes    | No            | No          | No      | No          | No    |
| Chugai Pharmaceutical Co., Ltd. | Alectinib                | 11.9                                 | 80.6                                 | Yes         | No               | No         | No     | No            | No          | No      | No          | No    |
| Chugai Pharmaceutical Co., Ltd. | Erlotinib                | 11.5                                 | 77.9                                 | Yes         | Yes              | No         | No     | No            | No          | No      | No          | No    |
| Chugai Pharmaceutical Co., Ltd. | Trastuzumab<br>Emtansine | 8.3                                  | 56.2                                 | No          | No               | No         | Yes    | No            | No          | No      | No          | No    |
| Daiichi Sankyo Co., Ltd.        | Denosumab                | 13.9                                 | 94.1                                 | Yes         | Yes              | Yes        | Yes    | Yes           | Yes         | Yes     | Yes         | Yes   |

|    |                        |                |                   |                    |     |     |     |     |     |     |     |     |     |
|----|------------------------|----------------|-------------------|--------------------|-----|-----|-----|-----|-----|-----|-----|-----|-----|
| 1  |                        |                |                   |                    |     |     |     |     |     |     |     |     |     |
| 2  |                        |                |                   |                    |     |     |     |     |     |     |     |     |     |
| 3  |                        |                |                   |                    |     |     |     |     |     |     |     |     |     |
| 4  |                        |                |                   |                    |     |     |     |     |     |     |     |     |     |
| 5  | Eisai Co., Ltd.        | Eribulin       | 7.8               | 52.8               | No  | No  | No  | Yes | No  | No  | No  | No  | Yes |
| 6  |                        |                |                   |                    |     |     |     |     |     |     |     |     |     |
| 7  | Eli Lilly Japan K.K.   | Pemetrexed     | 37.3              | 252.5              | Yes | No  |
| 8  |                        |                |                   |                    |     |     |     |     |     |     |     |     |     |
| 9  | Eli Lilly Japan K.K.   | Ramucirumab    | 28.9              | 195.7              | Yes | Yes | No  |
| 10 |                        |                |                   |                    |     |     |     |     |     |     |     |     |     |
| 11 | Nippon Boehringer      | Afatinib       | 8.7               | 58.9               | Yes | No  |
| 12 | Ingelheim Co., Ltd.    |                |                   |                    |     |     |     |     |     |     |     |     |     |
| 13 |                        |                |                   |                    |     |     |     |     |     |     |     |     |     |
| 14 | Novartis International | Imatinib       | 27.5              | 186.2              | No  | Yes | Yes | No  | No  | No  | No  | No  | No  |
| 15 | AG                     |                |                   |                    |     |     |     |     |     |     |     |     |     |
| 16 |                        |                |                   |                    |     |     |     |     |     |     |     |     |     |
| 17 | Novartis International | Nilotinib      | 20.7              | 140.1              | No  | No  | Yes | No  | No  | No  | No  | No  | No  |
| 18 | AG                     |                |                   |                    |     |     |     |     |     |     |     |     |     |
| 19 |                        |                |                   |                    |     |     |     |     |     |     |     |     |     |
| 20 | Novartis International | Everolimus     | 15.1 <sup>†</sup> | 102.2 <sup>†</sup> | Yes | Yes | No  | Yes | Yes | No  | Yes | No  | No  |
| 21 | AG                     |                |                   |                    |     |     |     |     |     |     |     |     |     |
| 22 |                        |                |                   |                    |     |     |     |     |     |     |     |     |     |
| 23 | Ono Pharmaceutical     | Nivolumab      | 103.9             | 703.5              | Yes | No  | Yes | No  | Yes | No  | Yes | Yes | No  |
| 24 | Co., Ltd.              |                |                   |                    |     |     |     |     |     |     |     |     |     |
| 25 |                        |                |                   |                    |     |     |     |     |     |     |     |     |     |
| 26 | Daiho Pharmaceutical   | Tegafur/Gimer  | 26.9              | 182.1              | Yes | Yes | No  | Yes | Yes | No  | No  | No  | No  |
| 27 | Co., Ltd.              | acil/Oteracil  |                   |                    |     |     |     |     |     |     |     |     |     |
| 28 |                        |                |                   |                    |     |     |     |     |     |     |     |     |     |
| 29 | Daiho Pharmaceutical   | nab-Paclitaxel | 20.7              | 140.1              | Yes | Yes | No  | Yes | No  | No  | No  | No  | No  |
| 30 | Co., Ltd.              |                |                   |                    |     |     |     |     |     |     |     |     |     |
| 31 |                        |                |                   |                    |     |     |     |     |     |     |     |     |     |
| 32 | Daiho Pharmaceutical   | Calcium        | 9.7               | 65.7               | No  | Yes | No  |
| 33 | Co., Ltd.              | Folate         |                   |                    |     |     |     |     |     |     |     |     |     |
| 34 |                        |                |                   |                    |     |     |     |     |     |     |     |     |     |
| 35 | Daiho Pharmaceutical   | Tegafur,       | 6.5               | 44.0               | Yes | Yes | No  | Yes | Yes | Yes | Yes | No  | No  |
| 36 | Co., Ltd.              | Uracil         |                   |                    |     |     |     |     |     |     |     |     |     |
| 37 |                        |                |                   |                    |     |     |     |     |     |     |     |     |     |
| 38 |                        |                |                   |                    |     |     |     |     |     |     |     |     |     |
| 39 |                        |                |                   |                    |     |     |     |     |     |     |     |     |     |
| 40 |                        |                |                   |                    |     |     |     |     |     |     |     |     |     |
| 41 |                        |                |                   |                    |     |     |     |     |     |     |     |     |     |
| 42 |                        |                |                   |                    |     |     |     |     |     |     |     |     |     |
| 43 |                        |                |                   |                    |     |     |     |     |     |     |     |     |     |
| 44 |                        |                |                   |                    |     |     |     |     |     |     |     |     |     |
| 45 |                        |                |                   |                    |     |     |     |     |     |     |     |     |     |
| 46 |                        |                |                   |                    |     |     |     |     |     |     |     |     |     |

1  
2  
3  
4  
5  
6  
7  
8  
9  
10  
11  
12  
13  
14  
15  
16  
17  
18  
19  
20  
21  
22  
23  
24  
25  
26  
27  
28  
29  
30  
31  
32  
33  
34  
35  
36  
37  
38  
39  
40  
41  
42  
43  
44  
45  
46

|                                 |             |                   |                  |    |     |    |     |    |    |     |    |    |
|---------------------------------|-------------|-------------------|------------------|----|-----|----|-----|----|----|-----|----|----|
| Takeda Pharmaceutical Co., Ltd. | Leuprorelin | 48.6 <sup>†</sup> | 329 <sup>†</sup> | No | No  | No | Yes | No | No | Yes | No | No |
| Takeda Pharmaceutical Co., Ltd. | Panitumumab | 18.8              | 127.3            | No | Yes | No | No  | No | No | No  | No | No |
| Yakult Honsha Co., Ltd.         | Oxaliplatin | 18.4              | 124.6            | No | Yes | No | No  | No | No | No  | No | No |

We converted Japanese yen (¥) to Pound Sterling (£), using the average monthly exchange rate for 2016, namely ¥147.7 yen per £1; A coverage under the Japanese National Health Insurance scheme in specific oncology subspecialty was considered by the end of the fiscal year of 2016 (March 31, 2017); <sup>†</sup> The sales includes that used for conditions other than cancer.

**Supplementary Material 4. Newly-approved oncology drugs and drugs with added indications during the fiscal years of 2015 and 2016.**

| Pharmaceutical company          | Drug name    | Date of approval   | Type of approval | Type of cancer             |
|---------------------------------|--------------|--------------------|------------------|----------------------------|
| AstraZeneca plc                 | Vandetanib   | September 28, 2015 | New approval     | Thyroid cancer             |
| AstraZeneca plc                 | Osimertinib  | March 28, 2016     | New approval     | Non-small cell lung cancer |
| Bayer Yakuhin, Ltd.             | Sorafenib    | February 29, 2016  | Added indication | Thyroid cancer             |
| Bayer Yakuhin, Ltd.             | Xofigo       | March 28, 2016     | New approval     | Prostate cancer            |
| Bristol-Myers Squibb K.K.       | Ipilimumab   | July 3, 2015       | New approval     | Melanoma                   |
| Bristol-Myers Squibb K.K.       | Paclitaxel   | September 24, 2015 | Added indication | Gastric cancer             |
| Bristol-Myers Squibb K.K.       | Elotuzumab   | September 28, 2016 | New approval     | Multiple myeloma           |
| Celgene Corporation             | Lenalidomide | December 21, 2015  | Added indication | Multiple myeloma           |
| Celgene Corporation             | Lenalidomide | March 2, 2017      | Added indication | Adult T-cell leukemia      |
| Chugai Pharmaceutical Co., Ltd. | Capecitabine | November 20, 2015  | Added indication | Gastric cancer             |
| Chugai Pharmaceutical Co., Ltd. | Bevacizumab  | May 23, 2016       | Added indication | Cervical cancer            |
| Chugai Pharmaceutical Co., Ltd. | Capecitabine | August 26, 2016    | Added indication | Rectal cancer              |

|                               |                       |                    |                  |                              |
|-------------------------------|-----------------------|--------------------|------------------|------------------------------|
| Eisai Co., Ltd.               | Eribulin              | February 29, 2016  | Added indication | Sarcoma                      |
| Eli Lilly Japan K.K.          | Ramucirumab           | May 23, 2016       | Added indication | Colorectal cancer            |
| Eli Lilly Japan K.K.          | Ramucirumab           | June 20, 2016      | Added indication | Non-small cell lung cancer   |
| GlaxoSmithKline K.K.          | Lapatinib             | November 20, 2015  | Added indication | Breast cancer                |
| Janssen Pharmaceutical K.K.   | Ibrutinib             | March 28, 2016     | New approval     | Chronic lymphocytic leukemia |
| Janssen Pharmaceutical K.K.   | Bortezomib            | June 26, 2015      | Added indication | Mantle cell lymphoma         |
| Janssen Pharmaceutical K.K.   | ibrutinib             | December 2, 2016   | Added indication | Mantle cell lymphoma         |
| Meiji Seika Pharma Co., Ltd.  | Talaporfin            | May 26, 2015       | Added indication | Esophageal cancer            |
| Minophagen Pharmaceutical Co. | Bexarotene            | January 22, 2016   | New approval     | Cutaneous T cell lymphoma    |
| MSD K.K.                      | Peginterferon Alfa-2b | May 26, 2015       | Added indication | Melanoma                     |
| MSD K.K.                      | Pembrolizumab         | September 28, 2016 | New approval     | Melanoma                     |
| MSD K.K.                      | Pembrolizumab         | December 19, 2016  | Added indication | Non-small cell lung cancer   |
| Mylan Seiyaku Ltd.            | Paclitaxel            | September 24, 2015 | Added indication | Gastric cancer               |
| Nippon Kayaku Co., Ltd.       | Paclitaxel            | September 24, 2015 | Added indication | Gastric cancer               |
| Nippon Kayaku Co., Ltd.       | Nogitecan             | November 20, 2015  | Added indication | Cervical cancer              |
| Novartis Pharma K.K.          | Panobinostat          | July 3, 2015       | New approval     | Multiple myeloma             |



|    |                                 |                  |                    |                  |                              |
|----|---------------------------------|------------------|--------------------|------------------|------------------------------|
| 1  |                                 |                  |                    |                  |                              |
| 2  |                                 |                  |                    |                  |                              |
| 3  |                                 |                  |                    |                  |                              |
| 4  |                                 |                  |                    |                  |                              |
| 5  | Novartis Pharma K.K.            | Ruxolitinib      | September 24, 2015 | Added indication | Polycythemia vera            |
| 6  |                                 |                  |                    |                  |                              |
| 7  | Novartis Pharma K.K.            | Dabrafenib       | March 28, 2016     | New approval     | Melanoma                     |
| 8  |                                 |                  |                    |                  |                              |
| 9  | Novartis Pharma K.K.            | Trametinib       | March 28, 2016     | New approval     | Melanoma                     |
| 10 |                                 |                  |                    |                  |                              |
| 11 | Novartis Pharma K.K.            | Ceritinib        | March 28, 2016     | New approval     | Non-small cell lung cancer   |
| 12 |                                 |                  |                    |                  |                              |
| 13 | Novartis Pharma K.K.            | Everolimus       | August 26, 2016    | Added indication | Neuro-endocrine tumor        |
| 14 |                                 |                  |                    |                  |                              |
| 15 | Ono Pharmaceutical Co., Ltd.    | Nivolumab        | February 29, 2016  | Added indication | Melanoma                     |
| 16 |                                 |                  |                    |                  |                              |
| 17 | Ono Pharmaceutical Co., Ltd.    | Nivolumab        | December 17, 2015  | Added indication | Non-small cell lung cancer   |
| 18 |                                 |                  |                    |                  |                              |
| 19 | Ono Pharmaceutical Co., Ltd.    | Carfilzomib      | July 4, 2016       | New approval     | Multiple myeloma             |
| 20 |                                 |                  |                    |                  |                              |
| 21 | Ono Pharmaceutical Co., Ltd.    | Nivolumab        | August 26, 2016    | Added indication | Renal cell cancer            |
| 22 |                                 |                  |                    |                  |                              |
| 23 | Ono Pharmaceutical Co., Ltd.    | Nivolumab        | December 2, 2016   | Added indication | Hodgkin lymphoma             |
| 24 |                                 |                  |                    |                  |                              |
| 25 | Ono Pharmaceutical Co., Ltd.    | Nivolumab        | March 24, 2017     | Added indication | Head and neck cancer         |
| 26 |                                 |                  |                    |                  |                              |
| 27 | Otsuka Pharmaceutical Co., Ltd. | Ponatinib        | September 28, 2016 | New approval     | Chronic myelogenous leukemia |
| 28 |                                 |                  |                    |                  |                              |
| 29 |                                 |                  |                    |                  | Multiple myeloma             |
| 30 |                                 |                  |                    |                  | Non-Hodgkin lymphoma         |
| 31 | Sanofi K.K.                     | Plerixafor       | December 19, 2016  | New approval     | Hodgkin                      |
| 32 |                                 |                  |                    |                  | lymphoma                     |
| 33 |                                 |                  |                    |                  |                              |
| 34 |                                 |                  |                    |                  |                              |
| 35 |                                 |                  |                    |                  |                              |
| 36 | Sanofi K.K.                     | Aflibercept Beta | March 30, 2017     | New approval     | Colorectal cancer            |
| 37 |                                 |                  |                    |                  |                              |
| 38 |                                 |                  |                    |                  |                              |
| 39 |                                 |                  |                    |                  |                              |
| 40 |                                 |                  |                    |                  |                              |
| 41 |                                 |                  |                    |                  |                              |
| 42 |                                 |                  |                    |                  |                              |
| 43 |                                 |                  |                    |                  |                              |
| 44 |                                 |                  |                    |                  |                              |
| 45 |                                 |                  |                    |                  |                              |
| 46 |                                 |                  |                    |                  |                              |

|    |                                    |                  |                    |                  |                    |
|----|------------------------------------|------------------|--------------------|------------------|--------------------|
| 1  |                                    |                  |                    |                  |                    |
| 2  |                                    |                  |                    |                  |                    |
| 3  |                                    |                  |                    |                  |                    |
| 4  |                                    |                  |                    |                  |                    |
| 5  | Shionogi & Co., Ltd.               | Cyclophosphamide | June 26, 2015      | Added indication | Malignant lymphoma |
| 6  |                                    |                  |                    |                  |                    |
| 7  | Shionogi & Co., Ltd.               | Prednisolone     | June 26, 2015      | Added indication | Malignant lymphoma |
| 8  |                                    |                  |                    |                  |                    |
| 9  | Taiho Pharmaceutical Co., Ltd.     | Trabectedin      | September 28, 2015 | New approval     | Sarcoma            |
| 10 |                                    |                  |                    |                  |                    |
| 11 | Takeda Pharmaceutical Company Ltd. | Prednisolone     | June 26, 2015      | Added indication | Malignant lymphoma |
| 12 |                                    |                  |                    |                  |                    |
| 13 |                                    |                  |                    |                  | Prostate cancer    |
| 14 | Takeda Pharmaceutical Company Ltd. | Leuprorelin      | September 28, 2015 | New approval     | Breast cancer      |
| 15 |                                    |                  |                    |                  |                    |
| 16 | Takeda Pharmaceutical Company Ltd. | Ixazomib         | March 30, 2017     | New approval     | Multiple myeloma   |
| 17 |                                    |                  |                    |                  |                    |
| 18 |                                    |                  |                    |                  |                    |
| 19 | Yakult Honsha Company, Limited.    | Oxaliplatin      | November 20, 2015  | Added indication | Gastric cancer     |
| 20 |                                    |                  |                    |                  |                    |
| 21 |                                    |                  |                    |                  |                    |
| 22 |                                    |                  |                    |                  |                    |
| 23 |                                    |                  |                    |                  |                    |
| 24 |                                    |                  |                    |                  |                    |
| 25 |                                    |                  |                    |                  |                    |
| 26 |                                    |                  |                    |                  |                    |
| 27 |                                    |                  |                    |                  |                    |
| 28 |                                    |                  |                    |                  |                    |
| 29 |                                    |                  |                    |                  |                    |
| 30 |                                    |                  |                    |                  |                    |
| 31 |                                    |                  |                    |                  |                    |
| 32 |                                    |                  |                    |                  |                    |
| 33 |                                    |                  |                    |                  |                    |
| 34 |                                    |                  |                    |                  |                    |
| 35 |                                    |                  |                    |                  |                    |
| 36 |                                    |                  |                    |                  |                    |
| 37 |                                    |                  |                    |                  |                    |
| 38 |                                    |                  |                    |                  |                    |
| 39 |                                    |                  |                    |                  |                    |
| 40 |                                    |                  |                    |                  |                    |
| 41 |                                    |                  |                    |                  |                    |
| 42 |                                    |                  |                    |                  |                    |
| 43 |                                    |                  |                    |                  |                    |
| 44 |                                    |                  |                    |                  |                    |
| 45 |                                    |                  |                    |                  |                    |
| 46 |                                    |                  |                    |                  |                    |

**STROBE 2007 (v4) Statement—Checklist of items that should be included in reports of *cross-sectional studies***

| Section/Topic                | Item # | Recommendation                                                                                                                                                                       | Reported on page # |
|------------------------------|--------|--------------------------------------------------------------------------------------------------------------------------------------------------------------------------------------|--------------------|
| <b>Title and abstract</b>    | 1      | (a) Indicate the study's design with a commonly used term in the title or the abstract                                                                                               | 1                  |
|                              |        | (b) Provide in the abstract an informative and balanced summary of what was done and what was found                                                                                  | 2-4                |
| <b>Introduction</b>          |        |                                                                                                                                                                                      |                    |
| Background/rationale         | 2      | Explain the scientific background and rationale for the investigation being reported                                                                                                 | 5-11               |
| Objectives                   | 3      | State specific objectives, including any prespecified hypotheses                                                                                                                     | 11                 |
| <b>Methods</b>               |        |                                                                                                                                                                                      |                    |
| Study design                 | 4      | Present key elements of study design early in the paper                                                                                                                              | 11-16              |
| Setting                      | 5      | Describe the setting, locations, and relevant dates, including periods of recruitment, exposure, follow-up, and data collection                                                      | 11-14              |
| Participants                 | 6      | (a) Give the eligibility criteria, and the sources and methods of selection of participants                                                                                          | 12                 |
| Variables                    | 7      | Clearly define all outcomes, exposures, predictors, potential confounders, and effect modifiers. Give diagnostic criteria, if applicable                                             | 14-16              |
| Data sources/<br>measurement | 8*     | For each variable of interest, give sources of data and details of methods of assessment (measurement). Describe comparability of assessment methods if there is more than one group | 14-16              |
| Bias                         | 9      | Describe any efforts to address potential sources of bias                                                                                                                            | Not applicable     |
| Study size                   | 10     | Explain how the study size was arrived at                                                                                                                                            | 12                 |
| Quantitative variables       | 11     | Explain how quantitative variables were handled in the analyses. If applicable, describe which groupings were chosen and why                                                         | 14-16              |
| Statistical methods          | 12     | (a) Describe all statistical methods, including those used to control for confounding                                                                                                | 14-16              |
|                              |        | (b) Describe any methods used to examine subgroups and interactions                                                                                                                  | 14-16              |
|                              |        | (c) Explain how missing data were addressed                                                                                                                                          | Not applicable     |
|                              |        | (d) If applicable, describe analytical methods taking account of sampling strategy                                                                                                   | 14-16              |
|                              |        | (e) Describe any sensitivity analyses                                                                                                                                                | 14-16              |

|                          |     |                                                                                                                                                                                                              |                |
|--------------------------|-----|--------------------------------------------------------------------------------------------------------------------------------------------------------------------------------------------------------------|----------------|
| <b>Results</b>           |     |                                                                                                                                                                                                              |                |
| Participants             | 13* | (a) Report numbers of individuals at each stage of study—eg numbers potentially eligible, examined for eligibility, confirmed eligible, included in the study, completing follow-up, and analysed            | 17             |
|                          |     | (b) Give reasons for non-participation at each stage                                                                                                                                                         | 17             |
|                          |     | (c) Consider use of a flow diagram                                                                                                                                                                           | Not applicable |
| Descriptive data         | 14* | (a) Give characteristics of study participants (eg demographic, clinical, social) and information on exposures and potential confounders                                                                     | 17             |
|                          |     | (b) Indicate number of participants with missing data for each variable of interest                                                                                                                          | Not applicable |
| Outcome data             | 15* | Report numbers of outcome events or summary measures                                                                                                                                                         | 17-20          |
| Main results             | 16  | (a) Give unadjusted estimates and, if applicable, confounder-adjusted estimates and their precision (eg, 95% confidence interval). Make clear which confounders were adjusted for and why they were included | 17-20          |
|                          |     | (b) Report category boundaries when continuous variables were categorized                                                                                                                                    | 14-15          |
|                          |     | (c) If relevant, consider translating estimates of relative risk into absolute risk for a meaningful time period                                                                                             | Not applicable |
| Other analyses           | 17  | Report other analyses done—eg analyses of subgroups and interactions, and sensitivity analyses                                                                                                               | 20             |
| <b>Discussion</b>        |     |                                                                                                                                                                                                              |                |
| Key results              | 18  | Summarise key results with reference to study objectives                                                                                                                                                     | 23             |
| Limitations              | 19  | Discuss limitations of the study, taking into account sources of potential bias or imprecision. Discuss both direction and magnitude of any potential bias                                                   | 29-30          |
| Interpretation           | 20  | Give a cautious overall interpretation of results considering objectives, limitations, multiplicity of analyses, results from similar studies, and other relevant evidence                                   | 23-29          |
| Generalisability         | 21  | Discuss the generalisability (external validity) of the study results                                                                                                                                        | 27-29          |
| <b>Other information</b> |     |                                                                                                                                                                                                              |                |
| Funding                  | 22  | Give the source of funding and the role of the funders for the present study and, if applicable, for the original study on which the present article is based                                                | 32             |

\*Give information separately for cases and controls in case-control studies and, if applicable, for exposed and unexposed groups in cohort and cross-sectional studies.

**Note:** An Explanation and Elaboration article discusses each checklist item and gives methodological background and published examples of transparent reporting. The STROBE checklist is best used in conjunction with this article (freely available on the Web sites of PLoS Medicine at <http://www.plosmedicine.org/>, Annals of Internal Medicine at <http://www.annals.org/>, and Epidemiology at <http://www.epidem.com/>). Information on the STROBE Initiative is available at [www.strobe-statement.org](http://www.strobe-statement.org).
