# Supplementary material for: Pharmaceutical payments to certified oncology specialists in Japan in 2016: a retrospective observational cross-sectional analysis
Source: PubMed Central journal article supplement — BMJ Open. 2019 Sep 6;9(9):e028805. doi: 10.1136/bmjopen-2018-028805 (PMC6731803; doi:10.1136/bmjopen-2018-028805), 2019-09-06
Supplement: bmjopen-2018-028805supp001.pdf [file bmjopen-2018-028805supp001.pdf]

**Supplementary Material 1. Seventy-eight pharmaceutical companies sampled and the start and end date of the period when the payment data was disclosed**

| Pharmaceutical company                          | Period of the payment data in 2016 |                   |
|-------------------------------------------------|------------------------------------|-------------------|
|                                                 | Start date                         | End date          |
| AbbVie GK                                       | January 1, 2016                    | December 31, 2016 |
| Asahi Kasei Pharma Corporation                  | April 1, 2016                      | March 31, 2017    |
| Aska Pharmaceutical Co., Ltd.                   | April 1, 2016                      | March 31, 2017    |
| Astellas Pharma Inc.                            | April 1, 2016                      | March 31, 2017    |
| AstraZeneca plc                                 | January 1, 2016                    | December 31, 2016 |
| Ayumi Pharmaceutical Corporation                | April 1, 2016                      | March 31, 2017    |
| Bayer Yakuhin, Ltd.                             | January 1, 2016                    | December 31, 2016 |
| Bee Brand Medico Dental. Co., Ltd. <sup>a</sup> | April 1, 2016                      | March 31, 2017    |
| Biofermin Seiyaku Co., Ltd. <sup>b</sup>        | April 1, 2016                      | March 31, 2017    |
| Bristol-Myers Squibb K.K.                       | April 1, 2016                      | March 31, 2017    |
| Celgene Corporation                             | January 1, 2016                    | December 31, 2016 |
| Chugai Pharmaceutical Co., Ltd.                 | January 1, 2016                    | December 31, 2016 |
| Daiichi Sankyo Company, Limited.                | April 1, 2016                      | March 31, 2017    |
| EA Pharma Co., Ltd.                             | April 1, 2016                      | March 31, 2017    |
| Eisai Co., Ltd.                                 | January 1, 2016                    | December 31, 2016 |
| Eli Lilly Japan K.K.                            | January 1, 2016                    | December 31, 2016 |
| EN Otsuka Pharmaceutical Co., Ltd. <sup>c</sup> | January 1, 2016                    | December 31, 2016 |
| Fujimoto Pharmaceutical Corporation             | July 1, 2016                       | June 30, 2017     |
| Fuso Pharmaceutical Industries, Ltd.            | April 1, 2016                      | March 31, 2017    |
| GlaxoSmithKline K.K.                            | January 1, 2016                    | December 31, 2016 |
| Hisamitsu Pharmaceutical Co., Inc.              | March 1, 2016                      | February 28, 2017 |
| Janssen Pharmaceutical K.K.                     | January 1, 2016                    | December 31, 2016 |
| Japan Tobacco Inc. <sup>d</sup>                 | Not available                      | Not available     |
| Kaken Pharmaceutical Co., Ltd.                  | April 1, 2016                      | March 31, 2017    |
| Kissei Pharmaceutical Co., Ltd.                 | April 1, 2016                      | March 31, 2017    |
| Kowa Company, Ltd.                              | April 1, 2016                      | March 31, 2017    |
| Kracie Holdings, Ltd.                           | January 1, 2016                    | December 31, 2016 |
| Kyorin Pharmaceutical Co., Ltd.                 | April 1, 2016                      | March 31, 2017    |

|                                                  |                  |                    |
|--------------------------------------------------|------------------|--------------------|
| Kyoto Pharmaceutical Industries, Ltd.            | June 1, 2016     | May 31, 2017       |
| Kyowa Hakko Kirin Company, Ltd.                  | January 1, 2016  | December 31, 2016  |
| Maruho Co., Ltd.                                 | October 1, 2016  | September 30, 2017 |
| Maruishi Pharmaceutical Co., Ltd.                | April 1, 2016    | March 31, 2017     |
| Meiji Seika Pharma Co., Ltd.                     | April 1, 2016    | March 31, 2017     |
| Merck Serono Co., Ltd.                           | January 1, 2016  | December 31, 2016  |
| Minophagen Pharmaceutical Co.                    | April 1, 2016    | March 31, 2017     |
| Mitsubishi Tanabe Pharma Corporation             | April 1, 2016    | March 31, 2017     |
| Mochida Pharmaceutical Co., Ltd.                 | April 1, 2016    | March 31, 2017     |
| MSD K.K.                                         | January 1, 2016  | December 31, 2016  |
| Mylan Seiyaku Ltd.                               | January 1, 2016  | December 31, 2016  |
| Nihon Pharmaceutical Co., Ltd.                   | April 1, 2016    | March 31, 2017     |
| Nippon Boehringer Ingelheim Co., Ltd.            | January 1, 2016  | December 31, 2016  |
| Nippon Chemiphar Co., Ltd.                       | January 1, 2016  | December 31, 2016  |
| Nippon Kayaku Co., Ltd.                          | April 1, 2016    | March 31, 2017     |
| Nippon Shinyaku Co., Ltd.                        | April 1, 2016    | March 31, 2017     |
| Nippon Zoki Pharmaceutical Co., Ltd.             | April 1, 2016    | March 31, 2017     |
| Novartis Pharma K.K.                             | January 1, 2016  | December 31, 2016  |
| Novo Nordisk Pharma Ltd.                         | January 1, 2016  | December 31, 2016  |
| Ono Pharmaceutical Co., Ltd.                     | April 1, 2016    | March 31, 2017     |
| Otsuka Holdings Co., Ltd. <sup>e</sup>           | January 1, 2016  | December 31, 2016  |
| Otsuka Pharmaceutical Co., Ltd.                  | January 1, 2016  | December 31, 2016  |
| Otsuka Pharmaceutical Factory, Inc. <sup>f</sup> | January 1, 2016  | December 31, 2016  |
| Pfizer Japan Inc.                                | December 1, 2015 | November 30, 2016  |
| POLA-Pharma.                                     | January 1, 2016  | December 31, 2016  |
| Research Institute for Microbial Diseases        | April 1, 2016    | March 31, 2017     |
| Sanofi K.K.                                      | January 1, 2016  | December 31, 2016  |
| Santen Pharmaceutical Co., Ltd.                  | April 1, 2016    | March 31, 2017     |
| Sanwa Kagaku Kenkyusho Co., Ltd.                 | April 1, 2016    | March 31, 2017     |
| Seikagaku Corporation                            | April 1, 2016    | March 31, 2017     |
| Senju Pharmaceutical Co., Ltd.                   | April 1, 2016    | March 31, 2017     |
| Shionogi & Co., Ltd.                             | April 1, 2016    | March 31, 2017     |
| Shire Japan K.K.                                 | January 1, 2016  | December 31, 2016  |
| Sumitomo Dainippon Pharma Co., Ltd.              | April 1, 2016    | March 31, 2017     |

|                                                     |                 |                   |
|-----------------------------------------------------|-----------------|-------------------|
| Taiho Pharmaceutical Co., Ltd.                      | January 1, 2016 | December 31, 2016 |
| Taisho Pharmaceutical Co., Ltd.                     | April 1, 2016   | March 31, 2017    |
| Taisho Toyama Pharmaceutical Co., Ltd. <sup>g</sup> | April 1, 2016   | March 31, 2017    |
| Takeda Pharmaceutical Company Ltd.                  | April 1, 2016   | March 31, 2017    |
| Teijin Pharma Limited.                              | April 1, 2016   | March 31, 2017    |
| Teikoku Seiyaku Co., Ltd.                           | January 1, 2016 | December 31, 2016 |
| Terumo Corporation                                  | April 1, 2016   | March 31, 2017    |
| Toa Eiyo Ltd.                                       | April 1, 2016   | March 31, 2017    |
| Toray Industries, Inc.                              | April 1, 2016   | March 31, 2017    |
| Torii Pharmaceutical Co., Ltd.                      | January 1, 2016 | December 31, 2016 |
| Toyama Chemical Co., Ltd.                           | April 1, 2016   | March 31, 2017    |
| Tsumura & Co.                                       | April 1, 2016   | March 31, 2017    |
| UCB Japan Co., Ltd.                                 | January 1, 2016 | December 31, 2016 |
| Wakamoto Pharmaceutical Co., Ltd.                   | April 1, 2016   | March 31, 2017    |
| Yakult Honsha Company, Limited.                     | April 1, 2016   | March 31, 2017    |
| Zeria Pharmaceutical Co., Ltd.                      | April 1, 2016   | March 31, 2017    |

<sup>a</sup> Affiliated company of Ono Pharmaceutical Co., Ltd.; <sup>b</sup> affiliated company of Taisho

Pharmaceutical Co., Ltd.; <sup>c</sup> affiliated company of Otsuka Pharmaceutical Co., Ltd.; <sup>d</sup> the company

left the Japan Pharmaceutical Manufacturers Association on March 31, 2018; <sup>e</sup> affiliated company of

Otsuka Pharmaceutical Co., Ltd.; <sup>f</sup> affiliated company of Otsuka Pharmaceutical Co., Ltd.; <sup>g</sup>

affiliated company of Taisho Pharmaceutical Co., Ltd. and Toyama Chemical Co., Ltd.

**Supplementary Material 2. Monetary value of payment (¥ [£]) in each company according to oncology subspecialty**

| Company                               | Respirology             | Gastroenterology        | Hematology              | Breast                 | Head and neck         | Gynaecology        | Urology              | Dermatology  | Other or undetermined | Total                    |
|---------------------------------------|-------------------------|-------------------------|-------------------------|------------------------|-----------------------|--------------------|----------------------|--------------|-----------------------|--------------------------|
| Chugai Pharmaceutical Co., Ltd.       | 32,937,605<br>[223,003] | 34,760,717<br>[235,347] | 17,702,450<br>[119,854] | 10,548,519<br>[71,419] | 0 [0]                 | 332,202<br>[2,249] | 229,104<br>[1,551]   | 0 [0]        | 7,319,896<br>[49,559] | 103,830,493<br>[702,982] |
| AstraZeneca plc                       | 44,013,864<br>[297,995] | 1,342,002 [9,086]       | 111,370 [754]           | 3,454,557<br>[23,389]  | 623,673<br>[4,223]    | 77,959 [528]       | 1,269,618<br>[8,596] | 0 [0]        | 1,035,742<br>[7,012]  | 51,928,785<br>[351,583]  |
| Taiho Pharmaceutical Co., Ltd.        | 14,561,511<br>[98,588]  | 24,880,266<br>[168,451] | 2,116,030<br>[14,327]   | 4,176,377<br>[28,276]  | 222,740<br>[1,508]    | 33,411 [226]       | 0 [0]                | 33,411 [226] | 4,699,814<br>[31,820] | 50,723,560<br>[343,423]  |
| Ono Pharmaceutical Co., Ltd.          | 29,657,836<br>[200,798] | 4,219,238<br>[28,566]   | 5,746,692<br>[38,908]   | 1,124,838<br>[7,616]   | 2,450,141<br>[16,589] | 0 [0]              | 133,644<br>[905]     | 0 [0]        | 4,499,348<br>[30,463] | 47,831,737<br>[323,844]  |
| Eli Lilly Japan K.K.                  | 24,707,436<br>[167,281] | 14,101,874<br>[95,476]  | 412,069<br>[2,790]      | 4,145,014<br>[28,064]  | 0 [0]                 | 0 [0]              | 0 [0]                | 0 [0]        | 1,458,947<br>[9,878]  | 44,825,340<br>[303,489]  |
| Bristol-Myers Squibb K.K.             | 16,471,626<br>[111,521] | 1,848,742<br>[12,517]   | 12,617,772<br>[85,428]  | 33,411<br>[226]        | 356,384<br>[2,413]    | 0 [0]              | 334,111<br>[2,262]   | 0 [0]        | 1,781,920<br>[12,064] | 33,443,966<br>[226,432]  |
| Takeda Pharmaceutical Company Ltd.    | 329,974<br>[2,234]      | 14,889,129<br>[100,807] | 9,781,123<br>[66,223]   | 579,124<br>[3,921]     | 57,276<br>[388]       | 0 [0]              | 286,381<br>[1,939]   | 0 [0]        | 2,357,953<br>[15,964] | 28,280,960<br>[191,476]  |
| Novartis Pharma K.K.                  | 4,031,596<br>[27,296]   | 2,609,889<br>[17,670]   | 13,667,153<br>[92,533]  | 5,260,980<br>[35,619]  | 77,959<br>[528]       | 0 [0]              | 55,685<br>[377]      | 0 [0]        | 1,500,084<br>[10,156] | 27,203,346<br>[184,180]  |
| Nippon Boehringer Ingelheim Co., Ltd. | 24,840,981<br>[168,185] | 189,329 [1,282]         | 434,110<br>[2,939]      | 0 [0]                  | 0 [0]                 | 0 [0]              | 0 [0]                | 0 [0]        | 523,439<br>[3,544]    | 25,987,859<br>[175,950]  |

|                                     |                       |                        |                        |                       |                       |       |                       |                    |                       |                         |
|-------------------------------------|-----------------------|------------------------|------------------------|-----------------------|-----------------------|-------|-----------------------|--------------------|-----------------------|-------------------------|
| Kyowa Hakko Kirin Company, Ltd.     | 4,065,005<br>[27,522] | 1,425,536 [9,652]      | 7,127,681<br>[48,258]  | 4,181,946<br>[28,314] | 111,370<br>[754]      | 0 [0] | 0 [0]                 | 222,740<br>[1,508] | 3,073,817<br>[20,811] | 20,208,095<br>[136,819] |
| Pfizer Japan Inc.                   | 7,782,876<br>[52,694] | 788,768 [5,340]        | 6,543,478<br>[44,302]  | 638,311<br>[4,322]    | 0 [0]                 | 0 [0] | 217,649<br>[1,474]    | 0 [0]              | 538,396<br>[3,645]    | 16,509,478<br>[111,777] |
| Merck Serono Co., Ltd.              | 1,002,330<br>[6,786]  | 11,588,836<br>[78,462] | 245,014<br>[1,659]     | 111,370<br>[754]      | 1,603,728<br>[10,858] | 0 [0] | 0 [0]                 | 0 [0]              | 1,826,468<br>[12,366] | 16,377,746<br>[110,885] |
| Eisai Co., Ltd.                     | 890,961<br>[6,032]    | 1,624,796<br>[11,001]  | 1,982,386<br>[13,422]  | 7,244,821<br>[49,051] | 1,948,977<br>[13,196] | 0 [0] | 0 [0]                 | 0 [0]              | 2,617,195<br>[17,720] | 16,309,136<br>[110,421] |
| Celgene Corporation                 | 0 [0]                 | 226,864 [1,536]        | 14,722,632<br>[99,679] | 0 [0]                 | 0 [0]                 | 0 [0] | 0 [0]                 | 0 [0]              | 257,800<br>[1,745]    | 15,207,296<br>[102,961] |
| Daiichi Sankyo Company, Limited.    | 1,826,473<br>[12,366] | 1,789,335<br>[12,115]  | 700,236<br>[4,741]     | 2,615,204<br>[17,706] | 0 [0]                 | 0 [0] | 389,796<br>[2,639]    | 0 [0]              | 1,451,057<br>[9,824]  | 8,772,101<br>[59,391]   |
| Bayer Yakuhin, Ltd.                 | 77,959 [528]          | 4,397,978<br>[29,776]  | 645,946<br>[4,373]     | 1,264,054<br>[8,558]  | 863,118<br>[5,844]    | 0 [0] | 278,425<br>[1,885]    | 0 [0]              | 813,001<br>[5,504]    | 8,340,481<br>[56,469]   |
| Yakult Honsha Company, Limited.     | 412,486<br>[2,793]    | 5,946,230<br>[40,259]  | 51,561 [349]           | 381,548<br>[2,583]    | 0 [0]                 | 0 [0] | 0 [0]                 | 0 [0]              | 1,526,201<br>[10,333] | 8,318,026<br>[56,317]   |
| Janssen Pharmaceutical K.K.         | 0 [0]                 | 0 [0]                  | 5,924,886<br>[40,114]  | 0 [0]                 | 0 [0]                 | 0 [0] | 1,742,945<br>[11,801] | 55,685 [377]       | 0 [0]                 | 7,723,516<br>[52,292]   |
| MSD K.K.                            | 2,224,616<br>[15,062] | 946,647 [6,409]        | 2,338,771<br>[15,835]  | 278,425<br>[1,885]    | 529,009<br>[3,582]    | 0 [0] | 0 [0]                 | 0 [0]              | 0 [0]                 | 6,317,468<br>[42,772]   |
| Sumitomo Dainippon Pharma Co., Ltd. | 478,658<br>[3,241]    | 1,926,703<br>[13,045]  | 2,712,881<br>[18,368]  | 0 [0]                 | 0 [0]                 | 0 [0] | 0 [0]                 | 0 [0]              | 77,959 [528]          | 5,196,201<br>[35,181]   |

|                                        |                      |                 |                       |                      |                    |       |                      |              |                    |                       |
|----------------------------------------|----------------------|-----------------|-----------------------|----------------------|--------------------|-------|----------------------|--------------|--------------------|-----------------------|
| Nippon Kayaku Co., Ltd.                | 974,487<br>[6,598]   | 958,195 [6,487] | 55,685 [377]          | 855,809<br>[5,794]   | 222,740<br>[1,508] | 0 [0] | 222,740<br>[1,508]   | 0 [0]        | 579,124<br>[3,921] | 3,868,780<br>[26,194] |
| Astellas Pharma Inc.                   | 600,000<br>[4,062]   | 340,000 [2,302] | 1,400,000<br>[9,479]  | 100,000<br>[677]     | 0 [0]              | 0 [0] | 1,100,000<br>[7,448] | 0 [0]        | 50,000 [339]       | 3,590,000<br>[24,306] |
| Nippon Shinyaku Co., Ltd.              | 33,411 [226]         | 33,411 [226]    | 2,851,072<br>[19,303] | 0 [0]                | 0 [0]              | 0 [0] | 211,603<br>[1,433]   | 0 [0]        | 0 [0]              | 3,129,497<br>[21,188] |
| Asahi Kasei Pharma Corporation         | 77,959 [528]         | 326,155 [2,208] | 2,138,304<br>[14,477] | 0 [0]                | 0 [0]              | 0 [0] | 111,370<br>[754]     | 0 [0]        | 448,664<br>[3,038] | 3,102,452<br>[21,005] |
| Sanofi K.K.                            | 0 [0]                | 312,500 [2,116] | 960,000<br>[6,500]    | 370,000<br>[2,505]   | 100,000<br>[677]   | 0 [0] | 750,000<br>[5,078]   | 0 [0]        | 100,000 [677]      | 2,592,500<br>[17,552] |
| Otsuka Holdings Co., Ltd. <sup>e</sup> | 100,000 [677]        | 770,000 [5,213] | 1,087,912<br>[7,366]  | 0 [0]                | 46,286<br>[313]    | 0 [0] | 0 [0]                | 0 [0]        | 200,000<br>[1,354] | 2,204,198<br>[14,923] |
| Mochida Pharmaceutical Co., Ltd.       | 0 [0]                | 679,357 [4,600] | 790,727<br>[5,354]    | 111,370<br>[754]     | 0 [0]              | 0 [0] | 0 [0]                | 0 [0]        | 567,987<br>[3,846] | 2,149,441<br>[14,553] |
| Teijin Pharma Limited.                 | 550,000<br>[3,724]   | 359,790 [2,436] | 1,020,000<br>[6,906]  | 0 [0]                | 0 [0]              | 0 [0] | 0 [0]                | 0 [0]        | 170,000<br>[1,151] | 2,099,790<br>[14,217] |
| AbbVie GK,                             | 0 [0]                | 735,042 [4,977] | 245,014<br>[1,659]    | 1,046,885<br>[7,088] | 0 [0]              | 0 [0] | 0 [0]                | 55,685 [377] | 0 [0]              | 2,082,626<br>[14,100] |
| Shionogi & Co., Ltd.                   | 556,848<br>[3,770]   | 443,416 [3,002] | 567,160<br>[3,840]    | 206,240<br>[1,396]   | 0 [0]              | 0 [0] | 0 [0]                | 0 [0]        | 175,304<br>[1,187] | 1,948,968<br>[13,195] |
| Kyorin Pharmaceutical Co., Ltd.        | 1,443,680<br>[9,774] | 144,368 [977]   | 72,184 [489]          | 0 [0]                | 0 [0]              | 0 [0] | 206,241<br>[1,396]   | 0 [0]        | 51,560 [349]       | 1,918,033<br>[12,986] |

|                                        |                    |                   |                    |                   |       |              |                  |       |                    |                       |
|----------------------------------------|--------------------|-------------------|--------------------|-------------------|-------|--------------|------------------|-------|--------------------|-----------------------|
| Tsumura & Co.                          | 33,411 [226]       | 1,347,578 [9,124] | 167,055<br>[1,131] | 55,685<br>[377]   | 0 [0] | 77,959 [528] | 0 [0]            | 0 [0] | 0 [0]              | 1,681,688<br>[11,386] |
| Meiji Seika Pharma Co., Ltd.           | 649,656<br>[4,398] | 154,680 [1,047]   | 278,424<br>[1,885] | 103,120<br>[698]  | 0 [0] | 0 [0]        | 0 [0]            | 0 [0] | 103,120 [698]      | 1,289,000<br>[8,727]  |
| Terumo Corporation                     | 110,440 [748]      | 585,332 [3,963]   | 77,308 [523]       | 0 [0]             | 0 [0] | 0 [0]        | 0 [0]            | 0 [0] | 441,760<br>[2,991] | 1,214,840<br>[8,225]  |
| Kissei Pharmaceutical Co., Ltd.        | 222,740<br>[1,508] | 55,685 [377]      | 0 [0]              | 0 [0]             | 0 [0] | 0 [0]        | 144,781<br>[980] | 0 [0] | 701,634<br>[4,750] | 1,124,840<br>[7,616]  |
| Zeria Pharmaceutical Co., Ltd.         | 77,959 [528]       | 645,946 [4,373]   | 222,740<br>[1,508] | 0 [0]             | 0 [0] | 0 [0]        | 0 [0]            | 0 [0] | 0 [0]              | 946,645<br>[6,409]    |
| Mitsubishi Tanabe Pharma Corporation   | 77,959 [528]       | 712,768 [4,826]   | 33,411 [226]       | 0 [0]             | 0 [0] | 0 [0]        | 0 [0]            | 0 [0] | 111,370 [754]      | 935,508<br>[6,334]    |
| EA Pharma Co., Ltd.                    | 0 [0]              | 752,776 [5,097]   | 0 [0]              | 0 [0]             | 0 [0] | 0 [0]        | 0 [0]            | 0 [0] | 30,936 [209]       | 783,712<br>[5,306]    |
| Taisho Toyama Pharmaceutical Co., Ltd. | 590,261<br>[3,996] | 0 [0]             | 33,411 [226]       | 0 [0]             | 0 [0] | 0 [0]        | 0 [0]            | 0 [0] | 77,959 [528]       | 701,631<br>[4,750]    |
| Kowa Company, Ltd.                     | 0 [0]              | 33,411 [226]      | 0 [0]              | 0 [0]             | 0 [0] | 0 [0]        | 0 [0]            | 0 [0] | 556,851<br>[3,770] | 590,262<br>[3,996]    |
| Hisamitsu Pharmaceutical Co., Inc.     | 22,274 [151]       | 89,096 [603]      | 0 [0]              | 167,055<br>[1131] | 0 [0] | 15,591 [106] | 0 [0]            | 0 [0] | 245,014<br>[1,659] | 539,030<br>[3,649]    |
| Novo Nordisk Pharma Ltd.               | 0 [0]              | 0 [0]             | 474,360<br>[3,212] | 0 [0]             | 0 [0] | 0 [0]        | 0 [0]            | 0 [0] | 0 [0]              | 474,360<br>[3,212]    |

|                                  |                    |                 |                    |                 |       |              |                  |                  |               |                    |
|----------------------------------|--------------------|-----------------|--------------------|-----------------|-------|--------------|------------------|------------------|---------------|--------------------|
| Sanwa Kagaku Kenkyusho Co., Ltd. | 0 [0]              | 0 [0]           | 445,480<br>[3,016] | 0 [0]           | 0 [0] | 0 [0]        | 0 [0]            | 0 [0]            | 0 [0]         | 445,480<br>[3,016] |
| Aska Pharmaceutical Co., Ltd.    | 0 [0]              | 111,370 [754]   | 0 [0]              | 77,959<br>[528] | 0 [0] | 33,411 [226] | 144,781<br>[980] | 0 [0]            | 55,685 [377]  | 423,206<br>[2,865] |
| Shire Japan K.K.                 | 0 [0]              | 0 [0]           | 367,521<br>[2,488] | 0 [0]           | 0 [0] | 0 [0]        | 0 [0]            | 0 [0]            | 0 [0]         | 367,521<br>[2,488] |
| Nihon Pharmaceutical Co., Ltd.   | 0 [0]              | 0 [0]           | 245,014<br>[1,659] | 0 [0]           | 0 [0] | 0 [0]        | 33,411<br>[226]  | 33,411 [226]     | 0 [0]         | 311,836<br>[2,111] |
| Nippon Chemiphar Co., Ltd.       | 0 [0]              | 167,055 [1,131] | 0 [0]              | 0 [0]           | 0 [0] | 0 [0]        | 0 [0]            | 0 [0]            | 111,370 [754] | 278,425<br>[1,885] |
| Ayumi Pharmaceutical Corporation | 226,864<br>[1,536] | 0 [0]           | 0 [0]              | 0 [0]           | 0 [0] | 0 [0]        | 0 [0]            | 0 [0]            | 0 [0]         | 226,864<br>[1,536] |
| Mylan Seiyaku Ltd.               | 0 [0]              | 206,240 [1,396] | 0 [0]              | 0 [0]           | 0 [0] | 0 [0]        | 0 [0]            | 0 [0]            | 0 [0]         | 206,240<br>[1,396] |
| Kracie Holdings, Ltd.            | 0 [0]              | 30,936 [209]    | 0 [0]              | 0 [0]           | 0 [0] | 0 [0]        | 0 [0]            | 0 [0]            | 103,120 [698] | 134,056<br>[908]   |
| GlaxoSmithKline K.K.             | 111,370 [754]      | 0 [0]           | 0 [0]              | 0 [0]           | 0 [0] | 0 [0]        | 0 [0]            | 0 [0]            | 0 [0]         | 111,370<br>[754]   |
| Minophagen Pharmaceutical Co.    | 0 [0]              | 0 [0]           | 0 [0]              | 0 [0]           | 0 [0] | 0 [0]        | 0 [0]            | 110,440<br>[748] | 0 [0]         | 110,440<br>[748]   |
| Maruho Co., Ltd.                 | 0 [0]              | 103,120 [698]   | 0 [0]              | 0 [0]           | 0 [0] | 0 [0]        | 0 [0]            | 0 [0]            | 0 [0]         | 103,120<br>[698]   |



|                                                 |                            |                          |                          |                         |                       |                    |                       |                    |                         |                            |
|-------------------------------------------------|----------------------------|--------------------------|--------------------------|-------------------------|-----------------------|--------------------|-----------------------|--------------------|-------------------------|----------------------------|
| Torii Pharmaceutical Co., Ltd.                  | 0 [0]                      | 0 [0]                    | 51,130 [346]             | 0 [0]                   | 0 [0]                 | 0 [0]              | 0 [0]                 | 51,130 [346]       | 0 [0]                   | 102,260<br>[692]           |
| EN Otsuka Pharmaceutical Co., Ltd. <sup>c</sup> | 0 [0]                      | 89,096 [603]             | 0 [0]                    | 0 [0]                   | 0 [0]                 | 0 [0]              | 0 [0]                 | 0 [0]              | 0 [0]                   | 89,096 [603]               |
| Kaken Pharmaceutical Co., Ltd.                  | 0 [0]                      | 0 [0]                    | 0 [0]                    | 77,959<br>[528]         | 0 [0]                 | 0 [0]              | 0 [0]                 | 0 [0]              | 0 [0]                   | 77,959 [528]               |
| Toray Industries, Inc.                          | 0 [0]                      | 0 [0]                    | 0 [0]                    | 77,080<br>[522]         | 0 [0]                 | 0 [0]              | 0 [0]                 | 0 [0]              | 0 [0]                   | 77,080 [522]               |
| Santen Pharmaceutical Co., Ltd.                 | 0 [0]                      | 0 [0]                    | 51,560 [349]             | 0 [0]                   | 0 [0]                 | 0 [0]              | 0 [0]                 | 0 [0]              | 0 [0]                   | 51,560 [349]               |
| Toyama Chemical Co., Ltd.                       | 33,410 [226]               | 0 [0]                    | 0 [0]                    | 0 [0]                   | 0 [0]                 | 0 [0]              | 0 [0]                 | 0 [0]              | 0 [0]                   | 33,410 [226]               |
| Total                                           | 216,806,522<br>[1,467,884] | 139,690,202<br>[945,770] | 119,219,713<br>[807,175] | 49,287,661<br>[333,701] | 9,213,401<br>[62,379] | 570,533<br>[3,863] | 7,862,285<br>[53,231] | 562,502<br>[3,808] | 42,240,495<br>[285,988] | 585,453,314<br>[3,963,800] |

We converted Japanese yen (¥) to Pound Sterling (£), using the average monthly exchange rate for 2016, namely ¥147.7 yen per £1.

**Supplementary Material 3. List of oncology drugs with Japanese domestic sales of at least ¥5 billion [£33.9 million] in 2016**

| Pharmaceutical company          | Drug name                | 2016 Sales (Billion, ¥) <sup>†</sup> | 2016 Sales (Million, £) <sup>†</sup> | Respirology | Gastroenterology | Hematology | Breast | Head and neck | Gynaecology | Urology | Dermatology | Other |
|---------------------------------|--------------------------|--------------------------------------|--------------------------------------|-------------|------------------|------------|--------|---------------|-------------|---------|-------------|-------|
| Astellas Pharma Inc.            | Enzalutamide             | 23.4                                 | 158.4                                | No          | No               | No         | No     | No            | No          | Yes     | No          | No    |
| Chugai Pharmaceutical Co., Ltd. | Bevacizumab              | 92.1                                 | 623.6                                | Yes         | Yes              | No         | Yes    | Yes           | Yes         | No      | No          | No    |
| Chugai Pharmaceutical Co., Ltd. | Trastuzumab              | 34.1                                 | 230.9                                | No          | Yes              | No         | Yes    | No            | No          | No      | No          | No    |
| Chugai Pharmaceutical Co., Ltd. | Rituximab                | 32.1 <sup>†</sup>                    | 217.3 <sup>†</sup>                   | No          | No               | Yes        | No     | No            | No          | No      | No          | No    |
| Chugai Pharmaceutical Co., Ltd. | Capecitabine             | 12.3                                 | 83.3                                 | No          | Yes              | No         | Yes    | No            | No          | No      | No          | No    |
| Chugai Pharmaceutical Co., Ltd. | Pertuzumab               | 11.9                                 | 80.6                                 | No          | No               | No         | Yes    | No            | No          | No      | No          | No    |
| Chugai Pharmaceutical Co., Ltd. | Alectinib                | 11.9                                 | 80.6                                 | Yes         | No               | No         | No     | No            | No          | No      | No          | No    |
| Chugai Pharmaceutical Co., Ltd. | Erlotinib                | 11.5                                 | 77.9                                 | Yes         | Yes              | No         | No     | No            | No          | No      | No          | No    |
| Chugai Pharmaceutical Co., Ltd. | Trastuzumab<br>Emtansine | 8.3                                  | 56.2                                 | No          | No               | No         | Yes    | No            | No          | No      | No          | No    |
| Daiichi Sankyo Co., Ltd.        | Denosumab                | 13.9                                 | 94.1                                 | Yes         | Yes              | Yes        | Yes    | Yes           | Yes         | Yes     | Yes         | Yes   |

|                                          |                                |                   |                    |     |     |     |     |     |     |     |     |     |
|------------------------------------------|--------------------------------|-------------------|--------------------|-----|-----|-----|-----|-----|-----|-----|-----|-----|
| Eisai Co., Ltd.                          | Eribulin                       | 7.8               | 52.8               | No  | No  | No  | Yes | No  | No  | No  | No  | Yes |
| Eli Lilly Japan K.K.                     | Pemetrexed                     | 37.3              | 252.5              | Yes | No  |
| Eli Lilly Japan K.K.                     | Ramucirumab                    | 28.9              | 195.7              | Yes | Yes | No  |
| Nippon Boehringer<br>Ingelheim Co., Ltd. | Afatinib                       | 8.7               | 58.9               | Yes | No  |
| Novartis International<br>AG             | Imatinib                       | 27.5              | 186.2              | No  | Yes | Yes | No  | No  | No  | No  | No  | No  |
| Novartis International<br>AG             | Nilotinib                      | 20.7              | 140.1              | No  | No  | Yes | No  | No  | No  | No  | No  | No  |
| Novartis International<br>AG             | Everolimus                     | 15.1 <sup>†</sup> | 102.2 <sup>†</sup> | Yes | Yes | No  | Yes | Yes | No  | Yes | No  | No  |
| Ono Pharmaceutical<br>Co., Ltd.          | Nivolumab                      | 103.9             | 703.5              | Yes | No  | Yes | No  | Yes | No  | Yes | Yes | No  |
| Taiho Pharmaceutical<br>Co., Ltd.        | Tegafur/Gimer<br>acil/Oteracil | 26.9              | 182.1              | Yes | Yes | No  | Yes | Yes | No  | No  | No  | No  |
| Taiho Pharmaceutical<br>Co., Ltd.        | nab-Paclitaxel                 | 20.7              | 140.1              | Yes | Yes | No  | Yes | No  | No  | No  | No  | No  |
| Taiho Pharmaceutical<br>Co., Ltd.        | Calcium<br>Folate              | 9.7               | 65.7               | No  | Yes | No  |
| Taiho Pharmaceutical<br>Co., Ltd.        | Tegafur,<br>Uracil             | 6.5               | 44.0               | Yes | Yes | No  | Yes | Yes | Yes | Yes | No  | No  |

|                                 |             |                   |                  |    |     |    |     |    |    |     |    |    |
|---------------------------------|-------------|-------------------|------------------|----|-----|----|-----|----|----|-----|----|----|
| Takeda Pharmaceutical Co., Ltd. | Leuprorelin | 48.6 <sup>†</sup> | 329 <sup>†</sup> | No | No  | No | Yes | No | No | Yes | No | No |
| Takeda Pharmaceutical Co., Ltd. | Panitumumab | 18.8              | 127.3            | No | Yes | No | No  | No | No | No  | No | No |
| Yakult Honsha Co., Ltd.         | Oxaliplatin | 18.4              | 124.6            | No | Yes | No | No  | No | No | No  | No | No |

We converted Japanese yen (¥) to Pound Sterling (£), using the average monthly exchange rate for 2016, namely ¥147.7 yen per £1; A coverage under the Japanese National Health Insurance scheme in specific oncology subspecialty was considered by the end of the fiscal year of 2016 (March 31, 2017); <sup>†</sup> The sales includes that used for conditions other than cancer.

**Supplementary Material 4. Newly-approved oncology drugs and drugs with added indications during the fiscal years of 2015 and 2016.**

| Pharmaceutical company          | Drug name    | Date of approval   | Type of approval | Type of cancer             |
|---------------------------------|--------------|--------------------|------------------|----------------------------|
| AstraZeneca plc                 | Vandetanib   | September 28, 2015 | New approval     | Thyroid cancer             |
| AstraZeneca plc                 | Osimertinib  | March 28, 2016     | New approval     | Non-small cell lung cancer |
| Bayer Yakuhin, Ltd.             | Sorafenib    | February 29, 2016  | Added indication | Thyroid cancer             |
| Bayer Yakuhin, Ltd.             | Radium 223   | March 28, 2016     | New approval     | Prostate cancer            |
| Bristol-Myers Squibb K.K.       | Ipilimumab   | July 3, 2015       | New approval     | Melanoma                   |
| Bristol-Myers Squibb K.K.       | Paclitaxel   | September 24, 2015 | Added indication | Gastric cancer             |
| Bristol-Myers Squibb K.K.       | Elotuzumab   | September 28, 2016 | New approval     | Multiple myeloma           |
| Celgene Corporation             | Lenalidomide | December 21, 2015  | Added indication | Multiple myeloma           |
| Celgene Corporation             | Lenalidomide | March 2, 2017      | Added indication | Adult T-cell leukemia      |
| Chugai Pharmaceutical Co., Ltd. | Capecitabine | November 20, 2015  | Added indication | Gastric cancer             |
| Chugai Pharmaceutical Co., Ltd. | Bevacizumab  | May 23, 2016       | Added indication | Cervical cancer            |
| Chugai Pharmaceutical Co., Ltd. | Capecitabine | August 26, 2016    | Added indication | Rectal cancer              |

|                               |                       |                    |                  |                              |
|-------------------------------|-----------------------|--------------------|------------------|------------------------------|
| Eisai Co., Ltd.               | Eribulin              | February 29, 2016  | Added indication | Sarcoma                      |
| Eli Lilly Japan K.K.          | Ramucirumab           | May 23, 2016       | Added indication | Colorectal cancer            |
| Eli Lilly Japan K.K.          | Ramucirumab           | June 20, 2016      | Added indication | Non-small cell lung cancer   |
| GlaxoSmithKline K.K.          | Lapatinib             | November 20, 2015  | Added indication | Breast cancer                |
| Janssen Pharmaceutical K.K.   | Ibrutinib             | March 28, 2016     | New approval     | Chronic lymphocytic leukemia |
| Janssen Pharmaceutical K.K.   | Bortezomib            | June 26, 2015      | Added indication | Mantle cell lymphoma         |
| Janssen Pharmaceutical K.K.   | Ibrutinib             | December 2, 2016   | Added indication | Mantle cell lymphoma         |
| Meiji Seika Pharma Co., Ltd.  | Talaporfin            | May 26, 2015       | Added indication | Esophageal cancer            |
| Minophagen Pharmaceutical Co. | Bexarotene            | January 22, 2016   | New approval     | Cutaneous T cell lymphoma    |
| MSD K.K.                      | Peginterferon Alfa-2b | May 26, 2015       | Added indication | Melanoma                     |
| MSD K.K.                      | Pembrolizumab         | September 28, 2016 | New approval     | Melanoma                     |
| MSD K.K.                      | Pembrolizumab         | December 19, 2016  | Added indication | Non-small cell lung cancer   |
| Mylan Seiyaku Ltd.            | Paclitaxel            | September 24, 2015 | Added indication | Gastric cancer               |
| Nippon Kayaku Co., Ltd.       | Paclitaxel            | September 24, 2015 | Added indication | Gastric cancer               |
| Nippon Kayaku Co., Ltd.       | Nogitecan             | November 20, 2015  | Added indication | Cervical cancer              |
| Novartis Pharma K.K.          | Panobinostat          | July 3, 2015       | New approval     | Multiple myeloma             |

|                                 |                  |                    |                  |                                                                                  |
|---------------------------------|------------------|--------------------|------------------|----------------------------------------------------------------------------------|
| Novartis Pharma K.K.            | Ruxolitinib      | September 24, 2015 | Added indication | Polycythemia vera                                                                |
| Novartis Pharma K.K.            | Dabrafenib       | March 28, 2016     | New approval     | Melanoma                                                                         |
| Novartis Pharma K.K.            | Trametinib       | March 28, 2016     | New approval     | Melanoma                                                                         |
| Novartis Pharma K.K.            | Ceritinib        | March 28, 2016     | New approval     | Non-small cell lung cancer                                                       |
| Novartis Pharma K.K.            | Everolimus       | August 26, 2016    | Added indication | Neuro-endocrine tumor                                                            |
| Ono Pharmaceutical Co., Ltd.    | Nivolumab        | December 17, 2015  | Added indication | Non-small cell lung cancer                                                       |
| Ono Pharmaceutical Co., Ltd.    | Nivolumab        | February 29, 2016  | Added indication | Melanoma                                                                         |
| Ono Pharmaceutical Co., Ltd.    | Carfilzomib      | July 4, 2016       | New approval     | Multiple myeloma                                                                 |
| Ono Pharmaceutical Co., Ltd.    | Nivolumab        | August 26, 2016    | Added indication | Renal cell cancer                                                                |
| Ono Pharmaceutical Co., Ltd.    | Nivolumab        | December 2, 2016   | Added indication | Hodgkin lymphoma                                                                 |
| Ono Pharmaceutical Co., Ltd.    | Nivolumab        | March 24, 2017     | Added indication | Head and neck cancer                                                             |
| Otsuka Pharmaceutical Co., Ltd. | Ponatinib        | September 28, 2016 | New approval     | Chronic myelogenous leukemia<br>Acute lymphoblastic leukemia<br>Multiple myeloma |
| Sanofi K.K.                     | Plerixafor       | December 19, 2016  | New approval     | Non-Hodgkin lymphoma<br>Hodgkin lymphoma                                         |
| Sanofi K.K.                     | Aflibercept Beta | March 30, 2017     | New approval     | Colorectal cancer                                                                |

---

|                                    |                  |                    |                  |                                  |
|------------------------------------|------------------|--------------------|------------------|----------------------------------|
| Shionogi & Co., Ltd.               | Cyclophosphamide | June 26, 2015      | Added indication | Malignant lymphoma               |
| Shionogi & Co., Ltd.               | Prednisolone     | June 26, 2015      | Added indication | Malignant lymphoma               |
| Taiho Pharmaceutical Co., Ltd.     | Trabectedin      | September 28, 2015 | New approval     | Sarcoma                          |
| Takeda Pharmaceutical Company Ltd. | Prednisolone     | June 26, 2015      | Added indication | Malignant lymphoma               |
| Takeda Pharmaceutical Company Ltd. | Leuprorelin      | September 28, 2015 | New approval     | Prostate cancer<br>Breast cancer |
| Takeda Pharmaceutical Company Ltd. | Ixazomib         | March 30, 2017     | New approval     | Multiple myeloma                 |
| Yakult Honsha Company, Limited.    | Oxaliplatin      | November 20, 2015  | Added indication | Gastric cancer                   |

---
